# Supplementary material
Source: PubMed Central journal article supplement (PMC6583690)
Supplement: jama-319-2486-s001.pdf [file jama-319-2486-s001.pdf]

1 **Front Page of Clinical Study Protocol of Fruquintinib**2 **CFDA Approval No.: 2013L01502, 2013L01503**

3

4

**Study Protocol**

5

6 **Study Title:** Fruquintinib randomised, double-blind, placebo-controlled, multicentre  
7 Phase III trial to compare efficacy and safety in combination with BSC vs. BSC in  
8 advanced colorectal cancer patients who have progressed after second-line  
9 chemotherapy (FRESCO).

10

11 **Short Title:** A Phase III clinical trial of Fruquintinib or placebo in treatment of  
12 advanced colorectal cancer patients who have progressed after second-line  
13 chemotherapy.

14

|                   |                            |
|-------------------|----------------------------|
| Protocol No.:     | 2013-013-00CH1             |
| Study Drug:       | Fruquintinib (HMPL-013)    |
| Study Objectives: | Efficacy and safety        |
| Sponsor:          | Hutchison Medi Pharma Ltd. |

15

16 Statement of proprietary: The Protocol is a property of Hutchison Medi Pharma Ltd.,  
17 and unauthorized spreading, copy or publishing is strictly prohibited.

18

19 **Clinical Study Protocol Signature Page\_01**

20

21 Signature of the representative from the Sponsor

22

23

24 Your signature on this page indicates that the final Clinical Study Protocol is  
25 accepted.

26

27

28 Name: Ye Hua

Title: Head of Clinical Development and  
Regulatory Affairs

29

30

31

32 Signature:

Date:

33

34 **Clinical Study Protocol Signature Page\_02**

35

36 Signature of the Principal Investigator

37

38 Your signature on this page indicates that the final Clinical Study Protocol is  
39 accepted.

40

41

42 Name:

43

44 Signature:

Date:

45

46 **(Urgent) Contact Information of the Sponsor**

47 Should any medical emergency occur, please contact the Project Leader of the study  
48 team. If the Project Leader is unavailable, please call the Safety Reporting Contact at  
49 the corresponding telephone number listed below.

|                       | <b>Name</b> | <b>Tel</b>                  |
|-----------------------|-------------|-----------------------------|
| Project Leader        | Songhua FAN | 021-20673058<br>18516082311 |
| Safety Report Contact | Xiaoyun XI  | 021-20673061<br>18601688469 |

50

51

## Table of Contents

|    |                                                                                      |    |
|----|--------------------------------------------------------------------------------------|----|
| 52 | (Urgent) Contact Information of the Sponsor .....                                    | 4  |
| 53 | Abbreviations .....                                                                  | 8  |
| 54 | Synopsis .....                                                                       | 11 |
| 55 | 1 Background Information .....                                                       | 18 |
| 56 | 1.1 Colorectal Cancer .....                                                          | 18 |
| 57 | 1.2 Overview of Fruquintinib .....                                                   | 19 |
| 58 | 1.3 Clinical Application Experience for Fruquintinib .....                           | 20 |
| 59 | 1.3.1 Phase I Clinical Study Results of Fruquintinib for the Treatment of Advanced   |    |
| 60 | Solid Tumors .....                                                                   | 20 |
| 61 | 1.3.2 Phase Ib Study of Fruquintinib as Third-line or above Therapy for Treatment of |    |
| 62 | Advanced Colorectal Cancer .....                                                     | 21 |
| 63 | 1.4 Recommended Dose for Phase III Clinical Trial .....                              | 23 |
| 64 | 2 Study Objectives .....                                                             | 23 |
| 65 | 2.1 Primary Efficacy Endpoint .....                                                  | 23 |
| 66 | 2.2 Secondary Efficacy Endpoints .....                                               | 23 |
| 67 | 3 Study Design .....                                                                 | 24 |
| 68 | 3.1 Overview .....                                                                   | 24 |
| 69 | 3.1.1 Rationale of Study Design .....                                                | 24 |
| 70 | 3.1.2 Randomization Methods .....                                                    | 26 |
| 71 | 3.1.3 Reasonability of Study Design .....                                            | 26 |
| 72 | 3.1.4 End of Study .....                                                             | 26 |
| 73 | 3.2 Sample Size Determination .....                                                  | 27 |
| 74 | 4 Study Population .....                                                             | 27 |
| 75 | 4.1 Inclusion Criteria .....                                                         | 27 |
| 76 | 4.2 Exclusion Criteria .....                                                         | 28 |
| 77 | 4.3 End of Treatment (Withdrawal) Criteria .....                                     | 30 |
| 78 | 4.4 Subject Withdrawl During Treatment .....                                         | 30 |
| 79 | 4.5 Subject Withdrawal During Follow up .....                                        | 31 |
| 80 | 4.6 Subjects Replacement .....                                                       | 31 |
| 81 | 4.7 Drop-out Criteria .....                                                          | 31 |
| 82 | 5 Assessment Plan and Procedures .....                                               | 32 |
| 83 | 5.1 Screening Examination and Qualification Form .....                               | 39 |
| 84 | 5.2 Subjects Enrollment Procedures .....                                             | 39 |
| 85 | 5.3 Clinical Assessment .....                                                        | 40 |
| 86 | 5.3.1 Efficacy .....                                                                 | 40 |
| 87 | 5.3.1.1 Efficacy Endpoints .....                                                     | 40 |
| 88 | 5.3.1.2 Efficacy Assessment .....                                                    | 40 |
| 89 | 5.3.2 Performance Status .....                                                       | 41 |
| 90 | 5.3.3 Clinical Safety Assessment .....                                               | 41 |
| 91 | 5.3.3.1 Safety Endpoints .....                                                       | 41 |
| 92 | 5.3.3.2 Assessment of AEs, Safety Laboratory Parameters and Other Test Results       |    |

|     |        |                                                                            |    |
|-----|--------|----------------------------------------------------------------------------|----|
| 93  |        | 42                                                                         |    |
| 94  | 5.4    | Biomarker Exploratory Study .....                                          | 43 |
| 95  | 5.4.1  | Biomarker Observation Endpoints.....                                       | 43 |
| 96  | 5.4.2  | Specimen for Biomarker Analysis and Time of Collection.....                | 43 |
| 97  | 6      | Investigational Products and Administration .....                          | 44 |
| 98  | 6.1    | Investigational Products .....                                             | 44 |
| 99  | 6.1.1. | Drugs Provider .....                                                       | 44 |
| 100 | 6.1.2. | Specifications and Storage Life of the Investigational Products.....       | 44 |
| 101 | 6.1.3. | Labeling of the Investigational Products .....                             | 45 |
| 102 | 6.1.4. | Storage of the Investigational Products .....                              | 45 |
| 103 | 6.1.5. | Randomization of the Investigational Products .....                        | 45 |
| 104 | 6.1.6. | Investigational Products Accountability .....                              | 45 |
| 105 | 6.1.7. | Investigational Products Disposition .....                                 | 45 |
| 106 | 6.2    | Administration Method .....                                                | 46 |
| 107 | 6.2.1  | Dosage and Cycle .....                                                     | 46 |
| 108 | 6.2.2  | Mode of Administration.....                                                | 46 |
| 109 | 6.3    | Dose Adjustment During the Study.....                                      | 47 |
| 110 | 6.3.1  | Treatment Principles for Toxicities During the Study.....                  | 47 |
| 111 | 6.3.2  | Treatment of Toxic and Side Effects Possibly Related to Fruquintinib ..... | 48 |
| 112 | 6.3.3  | Standard for Dose Adjustment Induced by Investigational Products Related   |    |
| 113 |        | Toxicities.....                                                            | 50 |
| 114 | 6.3.4  | Treatment of Drug Overdose .....                                           | 55 |
| 115 | 6.4    | Blinding.....                                                              | 55 |
| 116 | 6.5    | Concomitant Treatment.....                                                 | 56 |
| 117 | 6.6    | Other Concomitant Treatments .....                                         | 56 |
| 118 | 6.7    | Treatment Compliance .....                                                 | 57 |
| 119 | 7      | Safety .....                                                               | 57 |
| 120 | 7.1    | Safety Parameters and Definitions .....                                    | 57 |
| 121 | 7.1.1  | Adverse Event (AE).....                                                    | 57 |
| 122 | 7.1.2  | Serious Adverse Events (SAEs).....                                         | 57 |
| 123 | 7.1.3  | Special Events Stipulated in the Protocol .....                            | 58 |
| 124 | 7.2    | Safety Parameters Collection and Assessment.....                           | 59 |
| 125 | 7.2.1  | Definition of AE Reporting Time.....                                       | 59 |
| 126 | 7.2.2  | AE Severity Assessment .....                                               | 59 |
| 127 | 7.2.3  | Drug-event Relationship .....                                              | 60 |
| 128 | 7.3    | Recording and Reporting of Safety Parameters .....                         | 61 |
| 129 | 7.3.1. | AE Recording .....                                                         | 61 |
| 130 | 7.3.2. | Expedited Reporting of SAEs .....                                          | 64 |
| 131 | 7.3.3. | Reporting of Special Events Stipulated by the Protocol .....               | 65 |
| 132 | 7.4    | Subjects Follow-up.....                                                    | 65 |
| 133 | 7.4.1  | Follow up of AEs .....                                                     | 65 |
| 134 | 7.4.2  | Follow up of SAEs.....                                                     | 66 |
| 135 | 7.4.3  | Follow-up of Special Events Regulated by the Protocol.....                 | 66 |

|     |         |                                                                                             |     |
|-----|---------|---------------------------------------------------------------------------------------------|-----|
| 136 | 7.5     | Emergency Unblinding .....                                                                  | 66  |
| 137 | 8       | Statistical Analysis Plan .....                                                             | 67  |
| 138 | 8.1     | Primary and Secondary Endpoints .....                                                       | 67  |
| 139 | 8.1.1   | Efficacy Endpoint .....                                                                     | 67  |
| 140 | 8.1.2   | Safety Endpoints: .....                                                                     | 68  |
| 141 | 8.2     | Statistics and Analysis Method .....                                                        | 68  |
| 142 | 8.2.1.  | Statistical Model .....                                                                     | 68  |
| 143 | 8.2.2.  | Types of Analysis .....                                                                     | 69  |
| 144 | 8.2.1.1 | Efficacy Analysis .....                                                                     | 69  |
| 145 | 8.2.1.2 | Safety Data Analysis .....                                                                  | 69  |
| 146 | 8.3     | Statistical Analysis Plan .....                                                             | 70  |
| 147 | 8.4     | Sample Size .....                                                                           | 70  |
| 148 | 9       | Data Quality Assurance .....                                                                | 71  |
| 149 | 10      | Data Monitoring Committee (DMC) .....                                                       | 71  |
| 150 | 11      | Ethics .....                                                                                | 72  |
| 151 | 11.1    | Local Regulations/Declaration of Helsinki .....                                             | 72  |
| 152 | 11.2    | Informed Consent .....                                                                      | 72  |
| 153 | 11.3    | Independent Ethics Committee (IEC)/Institution Review Board (IRB) .....                     | 72  |
| 154 | 12      | Protocol Modification .....                                                                 | 73  |
| 155 | 13      | Conditions of Study Termination .....                                                       | 73  |
| 156 | 14      | Study Documents, CRFs and Records Retention .....                                           | 74  |
| 157 | 14.1    | Investigators Files/Records Retention .....                                                 | 74  |
| 158 | 14.2    | Original Documents and Background Materials .....                                           | 74  |
| 159 | 14.3    | Direct Access to the Original Data and Documents .....                                      | 74  |
| 160 | 15      | Study Monitoring .....                                                                      | 74  |
| 161 | 16      | Confidentiality of the Study Documents and Patients' Records .....                          | 75  |
| 162 | 17      | Data Publication and Business Confidentiality Protection .....                              | 75  |
| 163 | 18      | References .....                                                                            | 77  |
| 164 |         | Appendix 1 ECOG Performance Status .....                                                    | 78  |
| 165 |         | Appendix 2 Response Evaluation Criteria in Solid Tumors RECIST Version 1.1 .....            | 79  |
| 166 |         | Appendix 3 Restricted and Prohibited Drugs and Food .....                                   | 98  |
| 167 |         | Appendix 4 Safety Data Report .....                                                         | 100 |
| 168 |         | Appendix 5 Clinical Evaluation of Liver Damage .....                                        | 101 |
| 169 |         | Appendix 6 Treatment of Hypertension (Extracted from Hypertension Treatment Guidelines) ... | 103 |
| 170 |         |                                                                                             |     |
| 171 |         |                                                                                             |     |

172 **Abbreviations**

| Terms and abbreviations | Definition                                                                           |
|-------------------------|--------------------------------------------------------------------------------------|
| AE                      | Adverse Event                                                                        |
| A/G                     | Albumin/globulin                                                                     |
| ALB                     | Albumin                                                                              |
| ALP                     | Alkaline phosphatase                                                                 |
| ALT                     | Alanine aminotransferase/glutamic-pyruvic transaminase                               |
| ANC                     | Absolute neutrophil count                                                            |
| APTT                    | Activated partial thromboplastin time                                                |
| AST                     | Aspartate aminotransferase/glutamic-oxalacetic transaminase                          |
| AUC <sub>0-24 hr</sub>  | Area under the concentration-time curve from 0 to 24 hours after drug administration |
| BSC                     | Best supportive care                                                                 |
| BUN                     | Blood urea nitrogen                                                                  |
| CEA                     | Carcino-embryonic antigen                                                            |
| CHOL                    | Cholesterol                                                                          |
| c-MET                   | Mesenchymal epithelial cells transforming factor                                     |
| CNS                     | Central nervous system                                                               |
| CR                      | Complete response                                                                    |
| CRC                     | Colorectal cancer                                                                    |
| CRF/eCRF                | Case Report Form/Electronic Case Report Form                                         |
| CT                      | Computed tomography                                                                  |
| CTC AE                  | Common Terminology Criteria for Adverse Event                                        |
| DCR                     | Disease control rate                                                                 |
| DFS                     | Disease free survival                                                                |
| DLT                     | Dose limiting toxicity                                                               |
| DMC                     | Data Monitoring Committee                                                            |
| ECG                     | Electrocardiogram                                                                    |



|            |                                                                                |
|------------|--------------------------------------------------------------------------------|
| ECOG       | Eastern Cooperative Oncology Group                                             |
| EGFR       | Epidermal growth factor receptor                                               |
| EORTC      | European Organization for Research and Treatment of Cancer                     |
| EC         | Ethics Committee                                                               |
| EOT        | End of Treatment                                                               |
| FDA        | Food and Drug Administration                                                   |
| FDG-PET    | Fluorodeoxyglucose positron emission tomography                                |
| FIB        | Fibrinogen                                                                     |
| Glu        | Glucose                                                                        |
| HFS        | Hand-foot syndrome                                                             |
| IC50       | Half maximal inhibitory concentration                                          |
| ICF        | Informed Consent Form                                                          |
| ICH        | International Conference on Harmonization                                      |
| INR        | International normalized ratio                                                 |
| ITT        | Intension to treat                                                             |
| IWRS       | Interactive Web Response System                                                |
| LDH        | Lactic dehydrogenase                                                           |
| LOAEL      | Lowest Observed Adverse Effect Level                                           |
| LVEF       | Left ventricular ejection fraction                                             |
| MedDRA     | Medical Dictionary for Regulatory Activities                                   |
| mg         | Milligram                                                                      |
| mL         | Milliliter                                                                     |
| MRI        | Magnetic Resonance Imaging                                                     |
| MTD        | Maximum Tolerated Dose                                                         |
| NCCN       | National Comprehensive Cancer Network                                          |
| NCI        | National Cancer Institute                                                      |
| NCI CTC AE | The National Cancer Institute Common Terminology Criteria<br>for Adverse Event |
| NE         | Not evaluable                                                                  |

|        |                                              |
|--------|----------------------------------------------|
| NOAEL  | No observed adverse effect level             |
| NSCLC  | Non-small-cell lung cancer                   |
| ORR    | Objective Response Rate                      |
| OS     | Overall Survival                             |
| PD     | Progressive disease or pharmacodynamics      |
| PDGFR  | Platelet-derived growth factor receptor      |
| PFS    | Progression-free Survival                    |
| PK     | Pharmacokinetics                             |
| p.o.   | Per os (oral administration)                 |
| PR     | Partial response                             |
| PS     | Performance status                           |
| PSA    | Prostate specific antigen                    |
| PT     | Prothrombin time                             |
| QD     | <i>quaque die</i> /once daily                |
| RECIST | Response Evaluation Criteria In Solid Tumors |
| SAE    | Serious Adverse Event                        |
| SD     | Stable Disease                               |
| TG     | Triglyceride                                 |
| TKi    | Tyrosine kinase inhibitor                    |
| TP     | Total protein                                |
| TSH    | Thyroid stimulating hormone                  |
| TT     | Thrombin time                                |
| TTP    | Time to progression                          |
| ULN    | Upper Limit of Normal                        |
| VEGF   | Vascular endothelial growth factor           |
| VEGFR  | Vascular endothelial growth factor receptor  |
| WHO    | World Health Organization                    |

174 **Synopsis**

|                            |                                                                                                                                                                                                                                                                                                                                                                                                                                                                                                                                                                                                                                                                                                                                                                                                                |
|----------------------------|----------------------------------------------------------------------------------------------------------------------------------------------------------------------------------------------------------------------------------------------------------------------------------------------------------------------------------------------------------------------------------------------------------------------------------------------------------------------------------------------------------------------------------------------------------------------------------------------------------------------------------------------------------------------------------------------------------------------------------------------------------------------------------------------------------------|
| Study Drug Name            | Fruquintinib                                                                                                                                                                                                                                                                                                                                                                                                                                                                                                                                                                                                                                                                                                                                                                                                   |
| Protocol No.               | 2013-013-00CH1                                                                                                                                                                                                                                                                                                                                                                                                                                                                                                                                                                                                                                                                                                                                                                                                 |
| Study Title                | Fruquintinib randomised, double-blind, placebo-controlled, multicentre Phase III trial to compare efficacy and safety in combination with BSC vs. BSC in advanced colorectal cancer patients who have progressed after second-line chemotherapy (FRESCO).                                                                                                                                                                                                                                                                                                                                                                                                                                                                                                                                                      |
| Short Title                | A Phase III clinical trial of Fruquintinib or placebo in treatment of advanced colorectal cancer patients who have progressed after second-line chemotherapy.                                                                                                                                                                                                                                                                                                                                                                                                                                                                                                                                                                                                                                                  |
| Phase                      | III                                                                                                                                                                                                                                                                                                                                                                                                                                                                                                                                                                                                                                                                                                                                                                                                            |
| Sponsor                    | Hutchison Medi Pharma Ltd.                                                                                                                                                                                                                                                                                                                                                                                                                                                                                                                                                                                                                                                                                                                                                                                     |
| Principal Investigator     | Prof. Jin LI                                                                                                                                                                                                                                                                                                                                                                                                                                                                                                                                                                                                                                                                                                                                                                                                   |
| Co-principal Investigator  | Prof. Shukui Qin                                                                                                                                                                                                                                                                                                                                                                                                                                                                                                                                                                                                                                                                                                                                                                                               |
| Study Sites                | Multiple clinical trial sites including Fudan University Cancer Hospital                                                                                                                                                                                                                                                                                                                                                                                                                                                                                                                                                                                                                                                                                                                                       |
| Planned Number of Subjects | Approximately 400 subjects are planned to be enrolled.                                                                                                                                                                                                                                                                                                                                                                                                                                                                                                                                                                                                                                                                                                                                                         |
| Study Duration             | Recruitment period is estimated to be about 15 months.<br>The study duration is estimated to be from Dec 2014 to Sep 2016.                                                                                                                                                                                                                                                                                                                                                                                                                                                                                                                                                                                                                                                                                     |
| Study Objective            | To evaluate the efficacy and safety of Fruquintinib in advanced colorectal cancer patients who have progressed after second-line chemotherapy.                                                                                                                                                                                                                                                                                                                                                                                                                                                                                                                                                                                                                                                                 |
| Study Design               | <p>This is a randomized, double-blind, placebo-controlled, multicenter Phase III clinical trial to compare the efficacy and safety of Fruquintinib in combination with BSC versus placebo in combination with BSC in patients with advanced colorectal cancer. Approximately 400 subjects will be randomized into either of the following treatment group at the ratio of 2:1 ( Fruquintinib vs. placebo):</p> <ul style="list-style-type: none"> <li>• Fruquintinib 5mg, orally, QD, in combination with BSC.</li> <li>• Placebo in combination with BSC.</li> </ul> <p>Rrandomization will be stratified based on the following factors:</p> <ul style="list-style-type: none"> <li>• Prior use of VEGF inhibitor treatment (Yes vs. No)</li> <li>• K-Ras gene status (wild type vs. mutant type)</li> </ul> |

|                        |                                                                                                                                                                                                                                                                                                                                                                                                                                                                                                                                                                                                                                                                                                                                                                                                                                             |
|------------------------|---------------------------------------------------------------------------------------------------------------------------------------------------------------------------------------------------------------------------------------------------------------------------------------------------------------------------------------------------------------------------------------------------------------------------------------------------------------------------------------------------------------------------------------------------------------------------------------------------------------------------------------------------------------------------------------------------------------------------------------------------------------------------------------------------------------------------------------------|
|                        | Subjects will receive study treatment with each cycle consisting of 4 weeks (1 cycle includes 3 weeks of continuous medication and 1 week of drug interruption [referred to as “3 wks on/1 wk off” for short]). Tumor evaluation will be performed using imaging method every 8 weeks until progressive disease (PD). Safety parameters include adverse event (AE), laboratory changes, vital signs and ECG changes. The tumor treatment and survival follow up after PD will also be recorded.                                                                                                                                                                                                                                                                                                                                             |
| Study Drug             | Fruquintinib Capsule                                                                                                                                                                                                                                                                                                                                                                                                                                                                                                                                                                                                                                                                                                                                                                                                                        |
| Active Ingredient/     | Fruquintinib (HMPL-013)                                                                                                                                                                                                                                                                                                                                                                                                                                                                                                                                                                                                                                                                                                                                                                                                                     |
| Dose                   | 5mg, QD, 3 wks on and 1 wk off                                                                                                                                                                                                                                                                                                                                                                                                                                                                                                                                                                                                                                                                                                                                                                                                              |
| Mode of Administration | Orally at fasting state                                                                                                                                                                                                                                                                                                                                                                                                                                                                                                                                                                                                                                                                                                                                                                                                                     |
| Treatment              | Subjects should continue the treatment until the occurrence of the following events or the termination of the trial:                                                                                                                                                                                                                                                                                                                                                                                                                                                                                                                                                                                                                                                                                                                        |
| Duration               | <ul style="list-style-type: none"> <li>• PD confirmed by Response Evaluation Criteria in Solid Tumors (RECIST Version 1.1);</li> <li>• Death;</li> <li>• Unable to return to <math>\leq</math> NCI CTC AE Grade 1 or the baseline value within 14 days after drug interruption caused by adverse reaction;</li> <li>• Abnormal liver function of NCI CTC AE Grade 4, bleeding of NCI CTC AE Grade 3 and above, artery thrombosis of any grade, or any other fatal adverse reaction of Grade 4;</li> <li>• Subject’s withdrawal of consent;</li> <li>• Any subject that should withdraw from the study treatment for his/her best interests according to the investigator;</li> <li>• Pregnancy of subjects during the study;</li> <li>• Subject’s poor compliance or unable to follow the Protocol;</li> <li>• Lost of follow up</li> </ul> |
| Control Drug           | Matching placebo of Fruquintinib                                                                                                                                                                                                                                                                                                                                                                                                                                                                                                                                                                                                                                                                                                                                                                                                            |
| Indications            | Advanced colorectal cancer (CRC)                                                                                                                                                                                                                                                                                                                                                                                                                                                                                                                                                                                                                                                                                                                                                                                                            |
| Evaluation             |                                                                                                                                                                                                                                                                                                                                                                                                                                                                                                                                                                                                                                                                                                                                                                                                                                             |
| —Efficacy              | <p><b>Primary Efficacy Endpoint:</b><br/>Overall Survival (OS)</p> <p><b>Secondary Efficacy Endpoints:</b><br/>Progression-free survival (PFS) (According to RECIST Version 1.1)</p>                                                                                                                                                                                                                                                                                                                                                                                                                                                                                                                                                                                                                                                        |

|                    |                                                                                                                                                                                                                                                                                                                                                                                                                                                                                                                                                                                                                                                                                                                                                                                                                                                                                                                                                                                                                                                                                                                                                                                                                                                                                                                                                                                                                                                                                                                                                                                                                                                                                                                                                                                                                                                                                                                                                                                                                |
|--------------------|----------------------------------------------------------------------------------------------------------------------------------------------------------------------------------------------------------------------------------------------------------------------------------------------------------------------------------------------------------------------------------------------------------------------------------------------------------------------------------------------------------------------------------------------------------------------------------------------------------------------------------------------------------------------------------------------------------------------------------------------------------------------------------------------------------------------------------------------------------------------------------------------------------------------------------------------------------------------------------------------------------------------------------------------------------------------------------------------------------------------------------------------------------------------------------------------------------------------------------------------------------------------------------------------------------------------------------------------------------------------------------------------------------------------------------------------------------------------------------------------------------------------------------------------------------------------------------------------------------------------------------------------------------------------------------------------------------------------------------------------------------------------------------------------------------------------------------------------------------------------------------------------------------------------------------------------------------------------------------------------------------------|
|                    | Objective Response Rate (ORR), Disease Control Rate (DCR), Duration of response (DOR) and stable disease (SD)                                                                                                                                                                                                                                                                                                                                                                                                                                                                                                                                                                                                                                                                                                                                                                                                                                                                                                                                                                                                                                                                                                                                                                                                                                                                                                                                                                                                                                                                                                                                                                                                                                                                                                                                                                                                                                                                                                  |
| —Safety            | Adverse events (AEs) will be judged and graded in accordance with NCI CTC AE Version 4.0 and comprehensive safety and tolerance evaluations will be performed based on the incidence, severity and outcomes of AEs.                                                                                                                                                                                                                                                                                                                                                                                                                                                                                                                                                                                                                                                                                                                                                                                                                                                                                                                                                                                                                                                                                                                                                                                                                                                                                                                                                                                                                                                                                                                                                                                                                                                                                                                                                                                            |
| Inclusion Criteria | <p>Patients can be enrolled in the study only if they meet all of the following criteria:</p> <ol style="list-style-type: none"> <li>1. Fully understand the study and signed the Informed Consent Form (ICF) out of their own will;</li> <li>2. Histologically and/or cytologically diagnosed with metastatic CRC (Phase IV), any other histological type is excluded</li> <li>3. Subjects who failed at least second-line standard chemotherapies including Fluorouracil, Oxaliplatin or Irinotecan. Failed chemotherapies are defined as occurrence of PD or intolerable toxicities during the treatment or within 3 months after the last dose.<br/>Notes: a) Each line of treatment up to PD includes one or more chemo drugs used for <math>\geq 1</math> cycle; b) Previous adjuvant/neoadjuvant therapy is allowed. If relapse or metastasis occurs during the adjuvant/neoadjuvant treatment period or within 6 months after the completion of the above treatment, then the adjuvant/neoadjuvant therapy is considered as the failure of first-line systemic chemotherapy for PD; c) Previous antitumor treatment regimen including chemotherapy combined with targeting drugs such as EGFR inhibitors (Cetuximab or Panitumumab, etc.) or VEGF inhibitors is allowed.</li> <li>4. Subjects must not received any systemic anti-tumor therapies such as chemotherapy or radiotherapy, immunotherapy, biological or hormonal therapy in the last 4 weeks, and have not received any VEGFR inhibitor treatment;</li> <li>5. 18-75 years of age (inclusive);</li> <li>6. Body weight <math>\geq 40</math>Kg;</li> <li>7. ECOG Performance Status (ECOG PS) <math>\leq 1(0-1)</math>;</li> <li>8. Heart function test: Left Ventricular Ejection Fraction (LVEF) <math>\geq 50\%</math> (echocardiogram test);</li> <li>9. Evident measurable lesion (s) that meets the Response Evaluation Criteria in Solid Tumors (RECIST 1.1);</li> <li>10. Expected survival <math>&gt; 12</math> weeks.</li> </ol> |
| Exclusion Criteria | <p>Patients shall not be enrolled in this study for any of the following criteria:</p> <ol style="list-style-type: none"> <li>1. Absolute neutrophil count (ANC) <math>&lt; 1.5 \times 10^9/L</math>, or blood platelet count (PLT) <math>&lt; 100 \times 10^9/L</math>, or hemoglobin <math>&lt; 90g/L</math>; blood transfusion within 1 week before enrollment for the purpose of enrollment is not allowed;</li> <li>2. Serum total bilirubin <math>&gt; 1.5 \times</math> Upper Limit of Normal (ULN); Alanine transaminase (ALT) and/or Aspartate transferase (AST) <math>&gt; 2.5 \times</math> ULN (subject to</li> </ol>                                                                                                                                                                                                                                                                                                                                                                                                                                                                                                                                                                                                                                                                                                                                                                                                                                                                                                                                                                                                                                                                                                                                                                                                                                                                                                                                                                              |

|  |                                                                                                                                                                                                                                                                                                                                                                                                                                                                                                                                                                                                                                                                                                                                                                                                                                                                                                                                                                                                                                                                                                                                                                                                                                                                                                                                                                                                                                                                                                                                                                                                                                                                                                                                                                                                                                                                                                                                                                                                                                                                                                                                                                                                                                                                                                                                                                                                                    |
|--|--------------------------------------------------------------------------------------------------------------------------------------------------------------------------------------------------------------------------------------------------------------------------------------------------------------------------------------------------------------------------------------------------------------------------------------------------------------------------------------------------------------------------------------------------------------------------------------------------------------------------------------------------------------------------------------------------------------------------------------------------------------------------------------------------------------------------------------------------------------------------------------------------------------------------------------------------------------------------------------------------------------------------------------------------------------------------------------------------------------------------------------------------------------------------------------------------------------------------------------------------------------------------------------------------------------------------------------------------------------------------------------------------------------------------------------------------------------------------------------------------------------------------------------------------------------------------------------------------------------------------------------------------------------------------------------------------------------------------------------------------------------------------------------------------------------------------------------------------------------------------------------------------------------------------------------------------------------------------------------------------------------------------------------------------------------------------------------------------------------------------------------------------------------------------------------------------------------------------------------------------------------------------------------------------------------------------------------------------------------------------------------------------------------------|
|  | <p>the normal value of each site), or ALT and/or AST &gt; 5×ULN for patients with liver metastases;</p> <ol style="list-style-type: none"> <li>3. Creatinine clearance rate &lt; 50mL/min;</li> <li>4. Uncontrollable hypertension with monotherapy, i.e. systolic blood pressure &gt; 140mmHg or diastolic blood pressure &gt; 90mmHg after monotherapy treatment.</li> <li>5. Clinically significant electrolyte abnormality;</li> <li>6. Result of urine protein test with 2+ or above, or urinary protein quantity ≥ 1.0g/24 h;</li> <li>7. Unrecovered from the toxicity of previous anticancer therapy (NCI CTC AE &gt; Grade 1, except for alopecia and neurotoxicity ≤ Grade 2 caused by Oxaliplatin), not fully recovered from previous surgeries or the time from the previous anticancer therapy or surgery is less than 4 weeks;</li> <li>8. Central Nervous System (CNS) metastatic disease or prior cerebral metastasis;</li> <li>9. Subjects with presence of clinically detectable second primary malignant tumors at the enrollment, or other malignant tumors within the last 5 years (excluding adequately treated skin basal cell carcinoma or carcinoma in situ of cervix).</li> <li>10. Clinically uncontrolled active infection, such as acute pneumonia, active hepatitis B or hepatitis C, etc. (previous medical history of hepatitis B virus infection regardless of whether controlled by medication, HBV DNA ≥ 10<sup>4</sup> × copy number or ≥ 2000 IU/mL);</li> <li>11. Having difficulty in swallowing or known drug malabsorption;</li> <li>12. Concurrent duodenal ulcer, ulcerative colitis, intestinal obstruction, other gastrointestinal diseases or other conditions that may lead to gastrointestinal bleeding or perforation according to the investigator's judgment; or with a history of intestinal perforation or intestinal fistula, which were not fully recovered after surgery;</li> <li>13. History of artery thrombosis or deep venous thrombosis within 6 months before enrollment, or having evidence or a history of bleeding tendency within 2 months before enrollment, regardless of severity;</li> <li>14. Occurrence of stroke or transient ischemic attack within 12 months before enrollment;</li> <li>15. Activated Partial Thromboplastin Time (APTT) or prothrombin time (PT) &gt; 1.5×ULN (subject to the normal range of each site);</li> </ol> |
|--|--------------------------------------------------------------------------------------------------------------------------------------------------------------------------------------------------------------------------------------------------------------------------------------------------------------------------------------------------------------------------------------------------------------------------------------------------------------------------------------------------------------------------------------------------------------------------------------------------------------------------------------------------------------------------------------------------------------------------------------------------------------------------------------------------------------------------------------------------------------------------------------------------------------------------------------------------------------------------------------------------------------------------------------------------------------------------------------------------------------------------------------------------------------------------------------------------------------------------------------------------------------------------------------------------------------------------------------------------------------------------------------------------------------------------------------------------------------------------------------------------------------------------------------------------------------------------------------------------------------------------------------------------------------------------------------------------------------------------------------------------------------------------------------------------------------------------------------------------------------------------------------------------------------------------------------------------------------------------------------------------------------------------------------------------------------------------------------------------------------------------------------------------------------------------------------------------------------------------------------------------------------------------------------------------------------------------------------------------------------------------------------------------------------------|

|                        |                                                                                                                                                                                                                                                                                                                                                                                                                                                                                                                                                                                                                                                                                                                                                                                                                                                                                                                                                                                                                                                                                                                                                                                                                                                                                                                                                                                                                                                                                                                                                                                                                                                                                                                                                                        |
|------------------------|------------------------------------------------------------------------------------------------------------------------------------------------------------------------------------------------------------------------------------------------------------------------------------------------------------------------------------------------------------------------------------------------------------------------------------------------------------------------------------------------------------------------------------------------------------------------------------------------------------------------------------------------------------------------------------------------------------------------------------------------------------------------------------------------------------------------------------------------------------------------------------------------------------------------------------------------------------------------------------------------------------------------------------------------------------------------------------------------------------------------------------------------------------------------------------------------------------------------------------------------------------------------------------------------------------------------------------------------------------------------------------------------------------------------------------------------------------------------------------------------------------------------------------------------------------------------------------------------------------------------------------------------------------------------------------------------------------------------------------------------------------------------|
|                        | <p>16. Skin wounds, surgical site, trauma site, severe mucosal ulcers or fracture not completely healed;</p> <p>17. Acute myocardial infarction, severe/unstable angina or received coronary artery bypass surgery within 6 months prior to enrollment; or patients with cardiac insufficiency of NYHA Grade 2 or above;</p> <p>18. Pregnant or lactating women, or female subjects of childbearing potentials with positive pregnancy test result before the first dose of the study treatment;</p> <p>19. Any clinical or laboratory abnormalities or compliance that considered as unfit to participate in this clinical trial according to the investigator;</p> <p>20. Serious psychological or psychiatric disorders;</p> <p>21. Participated in any other drug clinical trial during the last 4 weeks.</p>                                                                                                                                                                                                                                                                                                                                                                                                                                                                                                                                                                                                                                                                                                                                                                                                                                                                                                                                                      |
| End of Treatment (EOT) | <p>Subjects are considered to have completed the study treatment should the following conditions occur:</p> <ol style="list-style-type: none"> <li>1. PD (Normally, patients should discontinue the investigational products in the event of PD which is confirmed after CT/MRI examination and according to RECIST v1.1. Despite of the occurrence of progressive disease radiographically judged by the treating physician, if the clinical symptoms of the patient are significantly improved or stabilized; or obvious necrosis, liquefaction or degeneration appear in the tumor lesion; the patient can obtain survival benefit from continuation of the investigational products, the patient can continue the study treatment under close observation after obtaining the informed consent of the patient and approval from sponsor and the Leading PI of the leading site. However, the patient will be considered to have developed PD according to RECIST v1.1).</li> <li>2. Death;</li> <li>3. End of the entire trial</li> </ol> <p>Criteria for Study Treatment Withdrawal</p> <ol style="list-style-type: none"> <li>4. Unable to return to <math>\leq</math>NCI CTC AE Grade 1 or baseline value within 14 days after drug interruption caused by adverse reactions;</li> <li>5. Abnormal liver function of NCI CTC AE Grade 4 and bleeding of NCI CTC AE Grade 3 or above; arterial thrombosis of any severity; any other fatal adverse event of Grade 4. .</li> <li>6. Pregnancy;</li> <li>7. In the opinion of the investigator, the subject should withdraw from the study treatment for his/her best interests;</li> <li>8. Subjects or their legal representatives request to withdraw from the study;</li> <li>9. Lost to follow up;</li> </ol> |

|                                                                                                                                                                                                                                                                                                                                                                                                                                                                                                                                                                                                                                                                                                                                                                                                                                                                                                                                                                                                                                                                                                                                                                                                                                                                                                                                                                                                                                                                                                                                                                                                                                                                   |                                                                                                                                                                                                                                                                                                                                                                                                                                                                                                                                                                                                                                                                                                                                                                                                                                                                                                                                                                                                                                                                                                                                                                                                                                                                       |
|-------------------------------------------------------------------------------------------------------------------------------------------------------------------------------------------------------------------------------------------------------------------------------------------------------------------------------------------------------------------------------------------------------------------------------------------------------------------------------------------------------------------------------------------------------------------------------------------------------------------------------------------------------------------------------------------------------------------------------------------------------------------------------------------------------------------------------------------------------------------------------------------------------------------------------------------------------------------------------------------------------------------------------------------------------------------------------------------------------------------------------------------------------------------------------------------------------------------------------------------------------------------------------------------------------------------------------------------------------------------------------------------------------------------------------------------------------------------------------------------------------------------------------------------------------------------------------------------------------------------------------------------------------------------|-----------------------------------------------------------------------------------------------------------------------------------------------------------------------------------------------------------------------------------------------------------------------------------------------------------------------------------------------------------------------------------------------------------------------------------------------------------------------------------------------------------------------------------------------------------------------------------------------------------------------------------------------------------------------------------------------------------------------------------------------------------------------------------------------------------------------------------------------------------------------------------------------------------------------------------------------------------------------------------------------------------------------------------------------------------------------------------------------------------------------------------------------------------------------------------------------------------------------------------------------------------------------|
|                                                                                                                                                                                                                                                                                                                                                                                                                                                                                                                                                                                                                                                                                                                                                                                                                                                                                                                                                                                                                                                                                                                                                                                                                                                                                                                                                                                                                                                                                                                                                                                                                                                                   | 10. Poor compliance, or unable to follow the Protocol.                                                                                                                                                                                                                                                                                                                                                                                                                                                                                                                                                                                                                                                                                                                                                                                                                                                                                                                                                                                                                                                                                                                                                                                                                |
| Drop-out Criteria                                                                                                                                                                                                                                                                                                                                                                                                                                                                                                                                                                                                                                                                                                                                                                                                                                                                                                                                                                                                                                                                                                                                                                                                                                                                                                                                                                                                                                                                                                                                                                                                                                                 | <p>All the subjects who have signed the Informed Consent Form, and were confirmed eligible after screening and were randomized into the study have rights to withdraw from the study at any time.</p> <ol style="list-style-type: none"> <li>1. Subjects who have only signed the Informed Consent Form and were confirmed eligible after screening but were not randomized into the study will not be considered as drop out;</li> <li>2. Subjects who have withdrawn from the study for any reason at any time without taking at least one dose of investigational products and were unable to be evaluated for safety, and/or who were inevaluable for efficacy due to the failure to complete one cycle of treatment will be considered as drop-out. For drop-out cases, the reasons for drop out must be recorded in the CRF by the investigator and the related tumor evaluations should be completed as far as possible, and the final visit should be recorded as well.</li> <li>3. Subjects who have PD after enrolment with clear medical evidence will not be considered as drop out, but radiographical evidence must be provided; subjects who withdraw from the study due to intolerable toxicity will not be considered as drop out either.</li> </ol> |
| <p><b>Statistical Analysis:</b></p> <p>This is a matching placebo-controlled study, in which superiority test will be performed.</p> <p>Overall survival (OS) is defined as the time interval (days) from randomization to death caused by any reason. For patients without report of death at the time of analysis, the date of last known to survive will be the censoring date. Progression-free survival (PFS) is defined as the time interval (days) from randomization to PD or death. The comparison of OS between the two groups will be done by using the Intention to Treat (ITT) population. The final OS data analysis will be performed when 280 deaths occur in the ITT population.</p> <p>Stratified log-rank test will be used for the comparison of OS between the Fruquintinib group and the placebo group at a two-sided significance level of 0.05. The same stratification factors used for randomization will be used for statistical analysis: prior use of VEGF inhibitor (yes vs. no), K-Ras gene state (wild type vs. mutant type).</p> <p>Unstratified log-rank test results will be provided as well. For the median survival time (MST) in each treatment group, Kaplan-Meier estimates will be presented with curves to provide visually intuitive description of the differences between the two treatment groups. The estimation of treatment effects will be presented by the Hazard Ratio (HR) estimated by stratified COX model in a 95% Confidential Interval (CI).</p> <p><b>Sample Size Determination</b></p> <p>The number of primary endpoint events required for efficacy assessment will be calculated based on the</p> |                                                                                                                                                                                                                                                                                                                                                                                                                                                                                                                                                                                                                                                                                                                                                                                                                                                                                                                                                                                                                                                                                                                                                                                                                                                                       |



following assumptions:

- A two-sided significance level of 0.05;
- An 80% test power will be ensured when the true HR of treatment group/control group is 0.7, in other words, the median OS time is extended from 6.3 months to 9 months;
- The enrollment rate is 30 subjects per month, which can be achieved within 3 months after trial initiation;

Under the premise of these assumptions, approximately 400 subjects will be enrolled in nearly 15 months in this study. The final analysis of OS will be performed when about 280 OS (or death) events have been observed in 7 months after the end of enrollment.

Meanwhile the sample size will be adjusted according to the result of Phase II intestinal cancer trial of Fruquintinib (POC) and the overall survival data of the latest third-line and above placebo treatments for advance intestinal cancer at that time.

175

176

# 177 **1 Background Information**

178 For more details, see Investigator's Brochure in which the comprehensive information  
179 on study drug is provided<sup>[6]</sup>.

## 180 **1.1 Colorectal Cancer**

181 Colorectal Cancer (CRC) is a common malignancy, of which the worldwide incidence  
182 ranks the third place in both males and females. Its overall incidence rate in the  
183 western countries ranks the second place, and its number of new cases and that of  
184 mortality ranks the third place in the US in 2003. According to the International  
185 Agency for Research on Cancer (IARC), in Asia, especially economically developed  
186 regions, the CRC incidence also increased rapidly, and the number is almost close to  
187 that in the western countries. Since 2010, CRC has become the second cancer in  
188 morbidity and mortality in China, and its incidence in coastal areas has reached  
189 56/100000, with the morbidity age becoming increasingly younger. In Shanghai, the  
190 annual average increase of CRC incidence is 4.2%, ranking the second place in all  
191 cancers, accounting for 13.08% of its total population.

192 The most common therapy for advanced CRC is chemotherapy treatment, and  
193 combination regimens of various chemotherapy drugs such as  
194 Fluorouracil/Leucovorin (5FU/LV), Capecitabine, Irinotecan, Oxaliplatin and etc. are  
195 commonly used. In recent years, monoclonal antibody Bevacizumab against vascular  
196 endothelial growth factor (VEGF), and monoclonal antibodies Cetuximab and  
197 Panitumumab against the epidermal growth factor receptor (epidermal growth factor  
198 receptor, EGFR) are combined with chemotherapy respectively as the first-line  
199 treatment of patients with advanced CRC, and patient outcomes have been  
200 significantly improved <sup>[1-2]</sup>. Patients with CRC that are ineffectively treated by  
201 first-line therapy are mainly treated with second-line chemotherapy, of which the  
202 mechanisms of action of these drugs varies, so the treatment of choice mainly depends  
203 on the type of tumor, chemotherapy time, and side effects of the drugs, and the  
204 efficacy and safety of some drugs require further evaluation <sup>[2-3]</sup>. Bayer's  
205 multitargeted kinase inhibitor regorafenib, approved by the FDA in 2012, is of strong  
206 vascular endothelial growth factor receptor (VEGFR) kinase inhibitor activity and can  
207 inhibit angiogenesis well. The CORRECT trial showed that for the treatment of  
208 advanced CRC in patients ineffectively treated by second-line chemotherapy, the  
209 primary endpoint of median survival of Regorafenib group is 1.4 months longer  
210 compared with that of the placebo group (6.4m vs. 5.0m) and the hazard ratio is 0.773,  
211  $p = 0.0051$  <sup>[4]</sup>. In June 2014 at Spanish WCGIC, Bayer published the Phase III study  
212 (CONCUR trial) results of Regorafenib as third-line or above therapy for the

213 treatment of colorectal cancer in Asian patients, and the primary endpoint of median  
214 survival of Regorafenib is 2.5 months longer than that of the placebo (8.8m vs. 6.3m)  
215 and the hazard ratio is 0.55,  $p = 0.0012$ .

216 Angiogenesis is the most critical step in the occurrence and development of malignant  
217 tumors. Studies have showed that tumor angiogenesis can provide nutrients and  
218 remove the metabolites, and help tumor cells to transfer to the other parts of the body  
219 through new blood vessels. Therefore, effective inhibition of angiogenesis in the  
220 tumor region can suppress the growth of tumor cells, and reduce the incidence of  
221 metastasis. Currently, anti-angiogenesis has become the most promising new strategy  
222 for cancer treatment. The development of tumor angiogenesis is associated with a  
223 variety of vascular factors, because angiogenesis can be stimulated by a variety of  
224 angiogenic growth factors secreted by rapid growing tumor cells in anaerobic  
225 condition. One important factor is vascular endothelial cell growth factor (VEGF),  
226 which is found to be one of the main inducible factors related to tumor angiogenesis,  
227 so the VEGF/VEGFR signaling pathway is considered to be one of the most  
228 promising targets in molecular targeted therapies <sup>[5]</sup>.

229 In recent years, small molecule targeting anticancer drugs have been developed  
230 successfully, such as highly selective VEGF monoclonal antibody drug Bevacizumab  
231 for the treatment of advanced CRC and breast cancer, and Sunitinib for renal cell  
232 carcinoma and Sorafenib for liver cancer and renal cell carcinoma, promoting the  
233 transition from conventional treatment to individualized comprehensive ones, and  
234 many patients have benefit from controlled tumors and prolonged survival. Among  
235 them, Bevacizumab has fully proved the effectiveness of the target VEGF as well as  
236 its importance in the research and development of new drugs for its great clinical  
237 success. Sunitinib and Sorafenib belong to multiple targets (including VEGFR) small  
238 molecule kinase inhibitors, with simultaneous inhibition of tumor angiogenesis and  
239 cancer growth signaling kinase. However, great toxic side effects will occur due to  
240 excessive kinase inhibition. Therefore, the development of selective VEGFR II has  
241 become a global hotspot.

## 242 **1.2 Overview of Fruquintinib**

243 Fruquintinib is a small-molecule compound closely related to angiogenesis and targets  
244 the VEGF receptor kinase family. It is independently developed by Hutchison Medi  
245 Pharma Ltd. (hereinafter referred to as "the Sponsor"), with complete independent  
246 intellectual property right. Fruquintinib mainly exerts its function on the VEGFR  
247 family transmembrane receptors (VEGFR 1, 2 and 3) in the vascular endothelial cells.  
248 According to the tests, half inhibitory concentration (IC<sub>50</sub>) of Fruquintinib against  
249 VEGFR2, VEGFR1 and VEGFR3 are 35nM, 33nM and 0.5nM, respectively, and it  
250 has no inhibition (IC<sub>50</sub>> 3μM) on the activities of a variety of cell proliferation and

251 cell cycle associated kinases including cyclin-dependent kinases (CDK1, 2, 5), EGFR  
252 and mesenchymal-epithelial transition factor (c-Met). Besides, Fruquintinib also has  
253 no significant inhibition on the activities of platelet-derived growth factor receptor  
254 (PDGFR $\beta$ ) kinase (IC<sub>50</sub>>1 $\mu$ M). Therefore, with high kinase selectivity, Fruquintinib  
255 has a good selectivity at the molecular level.

256 The direct killing effect of Fruquintinib is very weak in 13 kinds of cells including  
257 primary human umbilical vein endothelial cells (HUVEC) (IC<sub>50</sub> $\geq$  30  $\mu$ M, with IC<sub>50</sub>  
258 of 18.7 $\mu$ M on primary HUVEC). Compared with the VEGF-dependent proliferation  
259 of HUVEC (with IC<sub>50</sub> of only 1.7 nM), the difference is of more than 10,000 times.  
260 Fruquintinib has high efficiency and low toxicity in the enzymology and cellular  
261 levels.

262 In models of nude mouse subcutaneous transplantation tumor of human colon cancer  
263 HT-29, human non-small cell lung cancer NCI-H460 and human renal cancer Caki-1,  
264 the doses of Fruquintinib are 0.77, 1.92, 4.8 and 12 mg/kg (2.5 times increment), once  
265 daily (QD), oral administration for 3 continuous weeks, Fruquintinib showed a  
266 dose-dependent tumor growth inhibition. In refractory tumor models such as  
267 malignant melanoma A375, pancreatic BXPC-3, pancreatic Miapaca and hepatoma  
268 Bel-7402, the daily doses of 1.5, 5 and 15 mg/kg of Fruquintinib has a significant  
269 inhibition of tumor growth. Human gastric carcinoma BGC-823 model is the most  
270 sensitive to Fruquintinib, and a daily dose of 2 mg/kg almost completely inhibits its  
271 growth.

## 272 **1.3 Clinical Application Experience for Fruquintinib**

### 273 **1.3.1 Phase I Clinical Study Results of Fruquintinib for the Treatment of** 274 **Advanced Solid Tumors**

275 This study was conducted in Fudan University Cancer Hospital. A total of 40 subjects  
276 with advanced malignant solid tumors were enrolled from Jan 2011 to Oct 2012,  
277 among whom 18 were male and 22 were female, and all of them were of Han ethnic  
278 group of China.

- 279 1. This study confirmed that the maximum tolerated dose (MTD) of Fruquintinib in  
280 the treatment of advanced malignant solid tumor patients with the administration  
281 mode of “orally, QD, continuous medication” was 4mg; and that for the  
282 administration mode of ‘3 wks on/ 1 wk off’ was 6mg.
- 283 2. Fruquintinib related adverse events observed in this study were all observed in the  
284 clinical studies of similar VEGFR targeted drugs, and no new safety information  
285 was obtained. The incidence of adverse events leading to treatment interruption or  
286 dose reduction was relatively low since the adverse events were mostly mild to

287 moderate. The most common adverse events during the study included hand-foot  
288 syndrome, hypertension, proteinuria and elevation of thyrotropic hormone, with  
289 majority of which were associated with mechanism of action of anti-angiogenesis,  
290 and the incidence and severity were similar to those of the same kind of VEGFR  
291 targeted drug; the incidence of other nonspecific adverse reactions such as  
292 gastrointestinal reaction (nausea, vomiting and loss of appetite, etc.), pain,  
293 transaminase increased, serum creatinine increased, and electrolyte abnormality  
294 was relatively low.

295 3. The preliminary efficacy analysis had shown that Fruquintinib had significant  
296 effect on subjects with advanced tumors ineffectively treated by multi-line  
297 therapies, with significant objective response rate (ORR) and disease control rate  
298 (DCR). Among the evaluable subjects, the tumor ORR and DCR for the 4mg dose  
299 group were 46.67% and 86.67% respectively; and the ORR and DCR for the 5mg  
300 “3 wks on/ 1 wk off” dose group were 57.14% and 85.71% respectively.

301 4. Fruquintinib deserves further research and development considering its clinical  
302 safety, tolerance and preliminary efficacy assessment results. The recommended  
303 doses for Phase II clinical study were 4mg, QD, orally, continuous medication,  
304 and 5mg, QD, orally, “3 wks on/ 1 wk off”.

### 305 **1.3.2 Phase Ib Study of Fruquintinib as Third-line or above Therapy for** 306 **Treatment of Advanced Colorectal Cancer**

307 The study “A randomized, open-label, Phase Ib study of Fruquintinib “4mg  
308 continuous medication” and “5mg 3 wks on/ 1 wk off” as the third-line or above  
309 treatment in patients with advanced colorectal cancer” was started in December 2012  
310 based on the results of Phase I dose escalation study and the proposed recommended  
311 dose. The study was conducted in Fudan University Shanghai Cancer Center and Sun  
312 Yat-sen University Cancer Center. The objective of this study was to further evaluate  
313 the safety, tolerance, PK characteristics and clinical efficacy of the two different  
314 modes of administration in treating advanced colorectal cancer, and to recommend  
315 better dose and mode of administration for Phase II/III studies.

### 316 **Conclusion of the Randomized Study (40 Cases)**

317 A total of 40 subjects were enrolled in the 2 sites (24 cases enrolled in site 01, Fudan  
318 University Shanghai Cancer Center and 16 cases enrolled in site 02, Sun Yat-sen  
319 University Cancer Center) up to 17 Sep 2013. 20 subjects were in the 4mg continuous

320 medication group (Group A), and the other 20 were in the 5mg, 3 wks on/ 1 wk off  
321 group (Group B). All the subjects received at least 2 cycles of Fruquintinib treatment  
322 or reached the primary endpoints for interim analysis.

323 The conclusions of the interim analysis were as follows:

324 For safety and tolerance: compared with Group A, Group B presented superior safety  
325 and tolerance considering the incidence of adverse events of Grade 3 or above and  
326 Grade 3 hand-foot syndrome. And the incidence of Grade 3 or above toxicities in  
327 Group B was significantly lower than that in the continuous medication group, and the  
328 difference was of significance. Also, the incidence of SAEs and AEs leading to  
329 permanent drug withdrawal as well as temporarily drug discontinuance/dose reduction  
330 was lower in Group B compared to Group A, which however, had no statistical  
331 significance.

332 Group B (5mg, QD, 3 wks on/ 1 wk off) was comparable to Group A (4mg, QD,  
333 continuous medication) in efficacy. For Group B, the DCR was 83.3%, and the  
334 16-week PFS rate was 65%, while for Group A, DCR was 76.4%, and the 16-week  
335 PFS rate was 35%.

336 According to the above findings, the mode of administration of Group B (5mg, QD, 3  
337 wks on/ 1 wk off) was chosen for the extension stage of the Phase Ib study, after  
338 discussion with investigators. And at the same time, the recommended dose and mode  
339 of administration were further defined as “5mg, QD, 3 wks on/ 1 wk off” for Phase  
340 III/III study of Fruquintinib.

#### 341 **Conclusion of Extension Trial (5mg 3 wks on /1 wk off, 42 Cases)**

342 A total of 22 subjects were enrolled in extension trial. As of 24 Apr 2014, totally 42  
343 subjects received Fruquintinib 5mg 3/1 treatment throughout the Phase Ib trial, all of  
344 which reached the primary endpoint for analysis.

345 The most common adverse reactions were hand-foot syndrome, proteinuria,  
346 hoarseness, elevation of thyrotropic hormone, hypertension, weakness, rash and blood  
347 platelet decrease, etc. Toxicities  $\geq$ Grade 3 related to study drug was relatively rare,  
348 and the only event with incidence  $>10\%$  was hypertension (19.4%).

349 The clinical efficacy observed: 16-PFS%=65%, DCR=83.3%; the median of  
350 progression-free survival (PFS) was about 5.3 months. For the 5mg, 3 wks on/ 1 wk  
351 off dose group in which 20 cases were randomized, the 6m-OS% was 70%, and  
352 9m-OS% was 50%.

## 353 **1.4 Recommended Dose for Phase III Clinical Trial**

354 The dose and mode of administration determined for the study are based on the safety  
355 and efficacy results of dose tolerance Phase I study (2009-013-00CH1) and Phase Ib  
356 study for the treatment of advanced colorectal cancer (2012-013-00CH3). And the  
357 recommended dose and mode of administration in Phase III trial are determined as  
358 ‘Fruquintinib 5mg, QD, 3wks on /1wk off ’.

## 359 **2 Study Objectives**

360 To compare the efficacy and safety of Fruquintinib in combination with best  
361 supportive care (BSC) versus placebo in combination with BSC in  
362 advanced colorectal cancer patients who have progressed after second-line  
363 chemotherapy.

### 364 **2.1 Primary Efficacy Endpoint**

365 ♦ Overall Survival (OS)

### 366 **2.2 Secondary Efficacy Endpoints**

367 ♦ Progression-free survival (PFS)

368 ♦ Objective response rate (ORR= complete response [CR]+partial response  
369 [PR])

370 ♦ Disease control rate (DCR=complete response [CR]+partial response  
371 [PR]+stable disease [SD])

372 ♦ Duration of response (DOR) and stable disease (SD)/treatment duration

373

### 374 3 Study Design

#### 375 3.1 Overview

##### 376 3.1.1 Rationale of Study Design

377 This is a randomized, double-blind, placebo-controlled, multicenter Phase III clinical  
 378 trial to compare the efficacy and safety of Fruquintinib in combination with BSC  
 379 versus matching placebo in combination with BSC in advanced colorectal cancer  
 380 patients who have progressed after second-line chemotherapy.

381 After checking the eligibility criteria, subjects will be randomized into either  
 382 Fruquintinib in combination with BSC group (treatment group) or placebo in  
 383 combination with BSC group (control group) at a ratio of 2:1. (Figure 1)

- 384 • Treatment group: subjects will receive Fruquintinib 5mg orally, QD, in  
 385 combination with BSC, 3 wks on/ 1 wk off.
- 386 • Control group: subjects will receive matching placebo 5mg orally, QD, in  
 387 combination with BSC, 3 wks on/ 1 wk off.

388 Figure 1 Overall Study Design

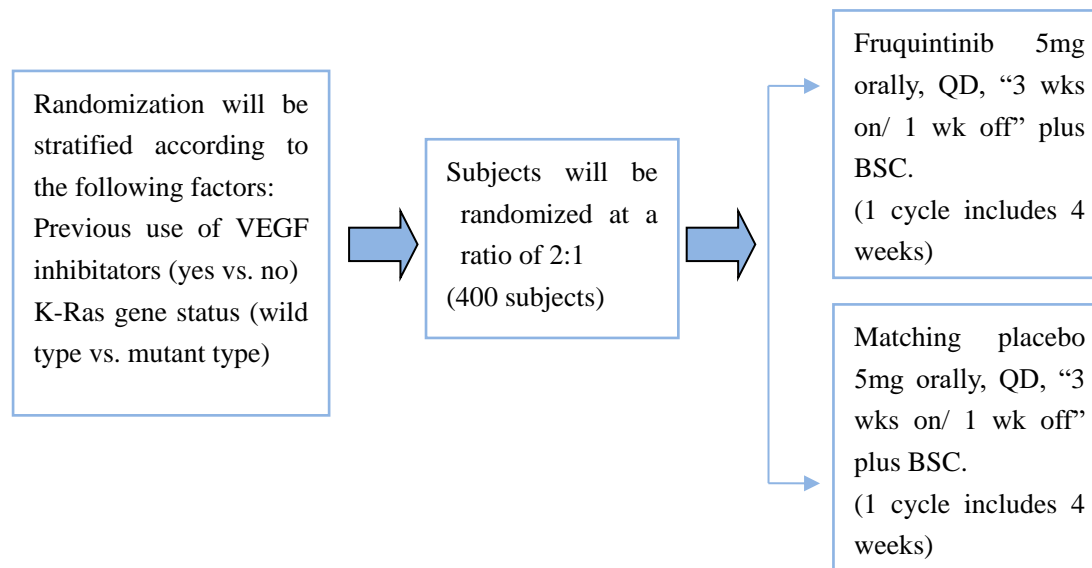

389

390 A treatment cycle is 28 days. Subjects' safety assessment and drug accountability will  
 391 be performed by each treatment cycle. Continuous drug safety monitoring and  
 392 assessment will be performed through the whole study period (including a 30-day  
 393 observation period after the end of treatment).



394 Patients will receive study treatment with each cycle of 4 weeks (1 cycle of study  
 395 treatment includes 3 weeks of continuous medication treatment and 1 week of drug  
 396 interruption) or until the occurrence of progressive disease (PD), death, unacceptable  
 397 toxicity, withdrawal of consent, or other conditions that meet the End of Treatment  
 398 criteria judged by physician for the best interest of the subjects. The tumor will be  
 399 evaluated radiographically using CT/MRI imaging method every 8 weeks, until the  
 400 occurrence of PD. If the subject has premature termination of the treatment for any  
 401 reason without receiving tumor evaluation, a timely imaging examination and tumor  
 402 evaluation are recommended. Safety parameters include Adverse Event (AE),  
 403 laboratory parameter changes, vital signs and ECG changes. Besides, the medication  
 404 and survival follow up after PD will be recorded.

405 If any subject develops PD, it will be considered as the end of treatment. The subjects  
 406 who, according to the investigator's discretion, can still benefit from the study  
 407 treatment after developing PD can continue to take the prior investigational product  
 408 (Fruquintinib or matching placebo, neither of the investigator, sponsor and the  
 409 subjects know which investigational product the subject is receiving) after the  
 410 investigator's consultation with the sponsor. The sponsor then will only provides  
 411 investigational products and free examination for safety evaluation; and during which  
 412 data other than SAE, safety data and survival status will not be collected.

413 This study will be divided into 3 stages, Baseline Period, Treatment Period and  
 414 Follow-up Period, from the start of treatment to the end of treatment, post-treatment  
 415 until final death.

#### 416 **Table 1 Time of the 3 Stages of the Study**

| Screening/Baseline                                                  | Treatment                                                                                             | Follow-up            |
|---------------------------------------------------------------------|-------------------------------------------------------------------------------------------------------|----------------------|
| D-21~D1(Before the 1 <sup>st</sup> study drug administration on D1) | D 1 of the 1 <sup>st</sup> cycle until End of Treatment (EOT) (including 1 week of drug interruption) | EOT to End of Study. |

417 The subjects can withdraw from the study in the following 4 conditions:

- 418 1. Death
- 419 2. Lost to follow-up
- 420 3. withdrawal of consent and refuse to provide information afterwards
- 421 4. End of Study

### 422 3.1.2 Randomization Methods

423 After screening, subjects who meet the eligibility criteria will be randomized into  
424 Fruquintinib in combination with BSC or matching placebo in combination with BSC  
425 group at a ratio of 2:1 according to the blinding principles, and stratified  
426 randomization will be performed. The stratified factors include prior use of VEGF  
427 inhibitors (yes vs. no), K-Ras gene status (wild type vs. mutant type). The  
428 Randomized number of each subject will be assigned to the investigator through the  
429 interactive web response system (IWRS).

### 430 3.1.3 Reasonability of Study Design

431 Advanced colorectal cancer cannot be cured by surgery. General treatment principles  
432 are aiming at controlling disease progression and prolonging survival. Commonly  
433 used drugs include Fluorouracil, Oxaliplatin, Irinotecan, Bevacizumab and  
434 monotherapy or combination treatment of anti-EGFG antibody that can improve  
435 prognosis. However, there are no effective treatment methods for subjects  
436 ineffectively treated by the above therapies, so BSC turns out to be the standard  
437 treatment. In that case, there are unsatisfying medical needs for subjects who failed to  
438 multi-line therapy in prolonged survival (including overall survival and  
439 progression-free survival) and the improvement of clinical symptoms. And subjects  
440 be enrolled in this study should be the above mentioned patients with advanced  
441 colorectal cancer and have received all approved and confirmed regimen and  
442 developed PD. As there is no effective standard treatment for the patients with  
443 advanced colorectal cancer who failed to second-line therapy, it is reasonable to  
444 provide them with BSC and placebo. The dose and mode of administration to be used  
445 in this clinical study are on the basis of summary results of dose escalation tolerability  
446 Phase I trial for Fruquintinib and the Phase Ib clinical study with third-line or above  
447 therapies for the treatment of advanced colorectal cancer.

### 448 3.1.4 End of Study

449 The primary endpoint is Overall Survival (OS), statistical unblinding will be  
450 conducted and then PFS will be analyzed and summarized in 1 month after subject  
451 enrollment was completed and about 300 PFS events were observed. OS will be  
452 analyzed and summarized in 7 months after the enrollment is completed and about  
453 280 OS events are observed (the entire trial is completed).

454 End of Study requirements: when 280 OS events have been observed. After the End  
455 of Study, the sponsor will continue to provide investigational drugs to subjects who  
456 do not achieve PFS, but data other than SAE will not be collected.

### 457 **3.2 Sample Size Determination**

458 The number of primary endpoint events required for efficacy assessment is calculated  
459 based on the following assumptions:

- 460 • A two-sided significance level of 0.05;
- 461 • An 80% test power will be ensured when the true Hazard Ratio (HR) of treatment  
462 group/control group is 0.7, in other words, the median OS time is extended from  
463 6.3 months to 9 months;
- 464 • The enrollment rate is 30 subjects per month, which can be achieved within 3  
465 months after study initiation;

466 Under the premise of these assumptions, approximately 400 subjects will be enrolled  
467 in this study in nearly 15 months. The PFS will be analyzed and summarized in 1  
468 month after the end of the enrollment and about 300 PFS events are observed. The OS  
469 will be analyzed and summarized in 7 months after enrollment is completed and about  
470 280 OS events are observed.

471 Meanwhile the sample size will be adjusted according to the result of Phase II  
472 intestinal cancer clinical trial of Fruquintinib (POC) and the overall survival data of  
473 the latest third-line and above placebo treatments for advance intestinal cancer at that  
474 time.

## 475 **4 Study Population**

### 476 **4.1 Inclusion Criteria**

477 Patients can be enrolled in this study only if they meet all of the following criteria:

- 478 1. Fully understand the study and signed the Informed Consent Form (ICF) out of  
479 their own will;
- 480 2. Histologically or cytologically diagnosed with metastasis CRC (Phase IV), any  
481 other histological type is excluded;
- 482 3. Subjects who failed at least second-line standard chemotherapies including  
483 Fluorouracil, Oxaliplatin, Irinotecan. Failed chemotherapies are defined as the  
484 occurrence of PD or intolerable toxicities during the treatment or within 3 months  
485 after the last dose.

486 Notes: a) Each line of treatments for advanced disease until PD includes one or more  
487 chemo drugs used for  $\geq 1$  cycle; b) Previous adjuvant/neoadjuvant therapy is allowed.  
488 If relapse or metastasis occur during the adjuvant/neoadjuvant treatment period or  
489 within 6 months after the completion of the above treatment, that  
490 adjuvant/neoadjuvant therapy is considered as the failure of first-line systemic  
491 chemotherapy for PD; c) Previous antitumor treatment regimen including  
492 chemotherapy combined with targeting drugs such as EGFR inhibitors (Cetuximab or  
493 Panitumumab, etc.) or VEGF inhibitors is allowed.

- 494 4. Subject must not receive any systematically anti-tumor therapies such as  
495 chemotherapy or radiotherapy, immunotherapy, biological or hormonal therapy  
496 during the last 4 weeks, and never receive any vascular endothelial growth factor  
497 (VEGFR) inhibitor treatment;
- 498 5. 18-75 years of age (inclusive);
- 499 6. Body weight  $\geq 40$  Kg;
- 500 7. ECOG Performance Status (ECOGPS)  $\leq 1$  (0-1);
- 501 8. Heart function test: Left Ventricular Ejection Fraction (LVEF)  $\geq 50\%$   
502 (echocardiogram test);
- 503 9. Evident measurable lesion(s) that meet the Response Evaluation Criteria in Solid  
504 Tumors (RECIST 1.1);
- 505 10. Expected survival  $> 12$  weeks.

## 506 4.2 Exclusion Criteria

507 Patients shall not be enrolled in this study for any of the following criteria:

- 508 1. Absolute neutrophil count (ANC)  $< 1.5 \times 10^9/L$ , or blood platelet count (PLT)  
509  $< 100 \times 10^9/L$ , or hemoglobin  $< 90g/L$ ; blood transfusion within 1 week before  
510 enrollment for the purpose of enrollment is not allowed;
- 511 2. Serum total bilirubin  $> 1.5 \times$  Upper Limit of Normal (ULN); Alanine transaminase  
512 (ALT) and/or Aspartate transferase (AST)  $> 2.5 \times$  ULN (subject to the normal value  
513 at each site); or ALT and/or AST  $> 5 \times$  ULN for patients with liver metastases;
- 514 3. Creatinine clearance rate  $< 50$  mL/min;
- 515 4. Uncontrolled hypertension by monotherapy, i.e. systolic blood  
516 pressure  $> 140$  mmHg or diastolic blood pressure  $> 90$  mmHg after monotherapy  
517 treatment.
- 518 5. Clinical significant electrolyte abnormality;
- 519 6. Results of urine protein detection with 2+ or above, or urinary protein quantity  
520  $\geq 1.0g/24h$ ;

- 521 7. Unrecovered toxicity from previous anticancer therapies (NCI CTC AE > Grade 1,  
522 except for alopecia and  $\leq$ Grade 2 neurotoxicity caused by Oxaliplatin), not fully  
523 recovered from previous surgeries; or the time from the last anticancer therapy or  
524 surgery is less than 4 weeks;
- 525 8. Central Nervous System (CNS) metastatic disease or prior cerebral metastasis;
- 526 9. Subjects with presence of clinically detectable second primary malignant tumors  
527 at enrollment, or other malignant tumors within the last 5 years (excluding  
528 adequately treated skin basal cell carcinoma or carcinoma in situ of cervix).
- 529 10. Clinically uncontrolled active infection, such as acute pneumonia, active hepatitis  
530 B or hepatitis C ( previous medical history of hepatitis B virus infection regardless  
531 of drug control, HBV DNA  $\geq 10^4$  ×copy number or  $\geq 2000$  IU/mL);
- 532 11. Difficulty in swallowing or known drug malabsorption;
- 533 12. Duodenal ulcer, ulcerative colitis, intestinal obstruction, other gastrointestinal  
534 diseases or other conditions that may lead to gastrointestinal bleeding or  
535 perforation according to the investigator's judgment; or with a history of intestinal  
536 perforation or intestinal fistula, which were not fully recovered after surgery;
- 537 13. History of artery thrombosis or deep venous thrombosis within 6 months before  
538 enrollment, or have evidence or a history of bleeding tendency within 2 months  
539 before the enrollment, regardless of severity;
- 540 14. Occurrence of stroke or transient ischemic attack within 12 months before the  
541 enrollment;
- 542 15. Activated Partial Thromboplastin Time (APTT) and/or prothrombin time (PT) >  
543 1.5×ULN (subject to the normal range at each site);
- 544 16. Skin wounds, surgical site, trauma site, severe mucosal ulcers or fracture not  
545 completely healed;
- 546 17. Acute myocardial infarction, severe/unstable angina or received coronary artery  
547 bypass surgery within 6 months prior to enrollment; or patients with cardiac  
548 insufficiency of NYHA Grade 2 or above;
- 549 18. Pregnant or lactating women Or female subjects with childbearing potentials with  
550 positive pregnancy test result before the first time of study drug treatment;
- 551 19. Any clinical or laboratory abnormalities or compliance concerns unfit to  
552 participate in this clinical trial according to the investigator's judgment;
- 553 20. Serious psychological or psychiatric disorders;
- 554 21. Participated in any other drug clinical trial during the last 4 weeks.

### 555 **4.3 End of Treatment (Withdrawal) Criteria**

556 Subjects are considered End of Treatment should the following conditions occur  
557 (Among which, 1-3 is considered as completed the study treatment, while 4-10 is  
558 considered as withdrawal from the treatment):

- 559 1. PD (Normally, patients should discontinue the investigational products in the  
560 event of PD which is confirmed after CT/MRI examination and according to  
561 RECIST v1.1. Despite of the occurrence of progressive disease  
562 radiographically judged by the treating physician, if the clinical symptoms of  
563 the patient are significantly improved or stabilized; or obvious necrosis,  
564 liquefaction or degeneration appear in the tumor lesion; the patient can obtain  
565 survival benefit from the continuation of the investigational products, the  
566 patient can continue the study treatment under close observation after  
567 obtaining the informed consent of the patient and approval from sponsor and  
568 the Leading PI of the leading site. However, the patient will be considered as  
569 the occurrence of PD according to RECIST v1.1);
- 570 2. Death;
- 571 3. End of the entire trial;
- 572 4. Unable to return to  $\leq$ NCI CTC AE Grade 1 or baseline value within 14 days  
573 after drug interruption;
- 574 5. Abnormal liver function of NCI CTC AE Grade 4, bleeding of NCI CTC AE  
575 Grade 3 or above, arterial thrombosis of any severity, or any other  
576 life-threatening adverse event of Grade 4.
- 577 6. Pregnancy of the subjects;
- 578 7. In the opinion of the investigator, the subject should withdraw from the study  
579 for his/her best interests;
- 580 8. Subjects or their legal representatives request to withdraw from the study;
- 581 9. Lost to follow up;
- 582 10. Poor compliance, or unable to follow the Protocol.

### 583 **4.4 Subject Withdrawal During Treatment**

584 In any case, the reasons of subjects' withdrawal must be recorded in Case Report  
585 Form (CRF) and subjects' medical records. And all the follow-up results of the  
586 subjects who discontinue the treatment must be recorded in CRF, unused  
587 investigational products must be counted and returned. In the event that subject's  
588 discontinuation of treatment is caused by adverse events or clinical laboratory test

589 abnormalities, the subject should be continually followed up until he/she recovers  
590 from the event, stable disease or the event can be explained by other reasons.

591 All the subjects who discontinue the treatment (including both Fruquintinib and  
592 matching placebo treatment) will enter into the follow-up period. And the subjects  
593 discontinue the treatment for any reason will be followed up for survival until  
594 recording as death, except for patients' withdrawal consent and clearly expressed to  
595 refuse follow-up. The survival state will be evaluated every 2 months after the end of  
596 treatment. Subjects will not be followed up at the end of the study. In addition, for  
597 subjects who discontinue the treatment and without PD, tumor evaluation will be  
598 recorded in the CRF and medical record to the greatest extent until PD.

#### 599 **4.5 Subject Withdrawal During Follow up**

600 Subject must withdraw from the study for the following reasons:

- 601 • Lost to follow-up;
- 602 • Subjects refuse to continue participating in the study for any reason at any time  
603 during the treatment. They will not be adversely affected.
- 604 • As per the requirements from the sponsor.

#### 605 **4.6 Subjects Replacement**

606 No replacement will be performed for any subject who withdraws from this study.

#### 607 **4.7 Drop-out Criteria**

608 All the subjects who have signed the Informed Consent Form, and were confirmed  
609 eligible after screening and randomized into the study have rights to withdraw from  
610 the study at any time.

- 611 1. Subjects who have only signed the Informed Consent Form and were confirmed  
612 eligible after screening but were not randomized into the study will not be  
613 considered as drop out;
- 614 2. Subjects who have withdrawn from the study for any reason at any time without  
615 taking at least one dose of investigational product and were unable to be evaluated  
616 for safety, and/or who were inevaluable for efficacy due to the failure to complete  
617 one cycle of treatment will be considered as drop out. For drop-out cases, the  
618 reasons for drop out must be recorded in the CRF by the investigator and the  
619 related tumor evaluations should be completed as far as possible, and the final  
620 visit should be recorded as well.
- 621 3. Subjects who have PD after enrolment with clear medical evidence will not be

622 considered as drop out, but radiographical evidence must be provided; subjects  
623 who withdraw from the study due to intolerable toxicity will not be considered as  
624 drop out either.

## 625 **5 Assessment Plan and Procedures**

626 See Table 2 for the schedule of the study (Schedule of Activities).

627



628 **Table 2 Schedule of Activities**

| Protocol activities <sup>22</sup>                   | Screening                                            |                                                      | Study Treatment             |               |                |                |               |                |               |                |               |                | Follow Up Period         |                                     |
|-----------------------------------------------------|------------------------------------------------------|------------------------------------------------------|-----------------------------|---------------|----------------|----------------|---------------|----------------|---------------|----------------|---------------|----------------|--------------------------|-------------------------------------|
|                                                     |                                                      |                                                      | Cycle 1                     |               |                |                | Cycle 2       |                | Cycle 3       |                | Cycle 4       | Cycle 5 to EOT | EOT Follow up            | Survival Follow Up                  |
|                                                     | Screening 1 (≦21 days prior to 1 <sup>st</sup> dose) | Screening 2 (2≦7 days prior to 1 <sup>st</sup> dose) | C1D1 (1 <sup>st</sup> dose) | C1D8 (±2days) | C1D15 (±2days) | C1D22 (±2days) | C2D1 (±3days) | C2D15 (±2days) | C3D1 (±3days) | C3D15 (±2days) | C4D1 (±3days) | C5D1+ (±3days) | Within 30 days after EOT | Every two months after EOT(±7 days) |
| Informed Consent <sup>1</sup>                       | X                                                    |                                                      |                             |               |                |                |               |                |               |                |               |                |                          |                                     |
| Medical History/Oncology History <sup>2</sup>       | X                                                    |                                                      |                             |               |                |                |               |                |               |                |               |                |                          |                                     |
| Surgery <sup>3</sup>                                | X                                                    |                                                      |                             |               |                |                |               |                |               |                |               |                |                          |                                     |
| Current Medical History/Baseline Signs and Symptoms |                                                      | X                                                    |                             |               |                |                |               |                |               |                |               |                |                          |                                     |
| Physical Examination <sup>4</sup>                   |                                                      | X                                                    |                             | X             | X              | X              | X             | X              | X             | X              | X             | X              | X                        |                                     |
| ECOG <sup>5</sup>                                   |                                                      | X <sup>5</sup>                                       |                             | X             | X              | X              | X             | X              | X             | X              | X             | X              | X                        |                                     |
| Demographics                                        | X                                                    |                                                      |                             |               |                |                |               |                |               |                |               |                |                          |                                     |

Hutchison Medi Pharma Ltd.  
 Simplified Chinese Protocol Version 3.0, dated 24 Nov 2014  
 Translated from Simplified Chinese to English on 5Dec2014 by Kuntuo  
 English Protocol Version 3.0, dated 5Dec2014

Confidential

|                                               |   |   |   |   |   |   |   |   |   |   |   |   |                 |  |
|-----------------------------------------------|---|---|---|---|---|---|---|---|---|---|---|---|-----------------|--|
| Vital Signs <sup>6</sup>                      |   | X |   | X | X | X | X | X | X | X | X | X | X               |  |
| Hematology <sup>7</sup>                       |   | X |   | X | X | X | X | X | X | X | X | X | X               |  |
| Blood Chemistry <sup>8</sup>                  |   | X |   | X | X | X | X | X | X | X | X | X | X               |  |
| Coagulation <sup>9</sup>                      |   | X |   | X | X | X | X | X | X | X | X | X | X               |  |
| Urinalysis <sup>10</sup>                      |   | X |   | X | X | X | X | X | X | X | X | X | X               |  |
| Stool Occult Blood Test                       |   | X |   | X | X | X | X | X | X | X | X | X | X               |  |
| Pregnancy Test (as appropriate) <sup>11</sup> |   | X |   |   |   |   |   |   |   |   |   |   | X               |  |
| Carcino-embryonic Antigen                     | X |   |   |   |   |   | X |   | X |   | X | X | X               |  |
| 12-lead ECG <sup>12</sup>                     | X |   |   |   |   |   | X |   | X |   | X | X | X               |  |
| Thyroid Function <sup>13</sup>                | X |   |   |   |   |   | X |   | X |   | X | X | X               |  |
| Echocardiogram <sup>14</sup>                  | X |   |   |   |   |   | X |   |   |   |   |   |                 |  |
| Tumor Evaluation <sup>15</sup>                | X |   |   |   |   |   |   |   | X |   |   | X | X <sup>15</sup> |  |
| Eligibility Assessment                        |   | X |   |   |   |   |   |   |   |   |   |   |                 |  |
| Subject Randomization <sup>16</sup>           |   | X |   |   |   |   |   |   |   |   |   |   |                 |  |
| Drug Assignment/Dis                           |   | X | X |   |   |   | X |   | X |   | X | X | X               |  |

|                                                                |   |   |   |   |   |   |   |   |   |   |   |   |   |   |
|----------------------------------------------------------------|---|---|---|---|---|---|---|---|---|---|---|---|---|---|
| pense/Return <sup>17</sup>                                     |   |   |   |   |   |   |   |   |   |   |   |   |   |   |
| Study Treatment <sup>18</sup>                                  |   |   | X | X | X | X | X | X | X | X | X | X |   |   |
| Concomitant medication/<br>Concomitant Procedure <sup>19</sup> | X | X | X | X | X | X | X | X | X | X | X | X | X |   |
| Adverse Event <sup>20</sup>                                    | X | X | X | X | X | X | X | X | X | X | X | X | X | X |
| Anti-Tumor Therapy                                             |   |   |   |   |   |   |   |   |   |   |   |   | X | X |
| Survival Follow Up <sup>21</sup>                               |   |   |   |   |   |   |   |   |   |   |   |   |   | X |
| Collection of Biomarker Samples <sup>23</sup>                  | X |   |   |   |   |   |   |   |   |   |   |   |   |   |

629 Notes:

- 630 1. ICF must be obtained prior to any study-specific procedure, and signature before 21 days prior to 1<sup>st</sup> dose is acceptable.
- 631 2. Medical History/Oncology History: Oncology History includes the date of primary diagnosis of CRC and its type; date of first metastasis; type of  
632 previous treatment, start/end date, best overall response, date of PD; adverse reaction with severity above 3 grades. Prior use of anti-VEGF (yes vs. no)  
633 and previous K-ras gene status (If K-ras gene detection was not performed previously, it should be done during Screening). Radiation Therapy  
634 includes start/end dates and site of radiation.
- 635 3. Surgery: operations (non-invasive diagnostic or therapeutic procedures, such as digestive endoscope, and biopsy, etc.) including start/end date, name of  
636 procedure and operation site must be recorded in CRF.
- 637 4. Physical examination includes Height (baseline only), weight, head, eyes, ears, nose, throat, neck, heart, chest (including the lung), abdomen, limbs, skin,  
638 lymph nodes, nervous system, and general condition.
- 639 5. ECOG: ECOG is to be performed during Screening 2.

- 640 6. Vital Signs include blood pressure, heart rate, respiration rate and temperature. For subject with a baseline history of antihypertensive medications, blood  
641 pressure should be monitored at 3 hours ( $\pm 2$  hours) after the daily doses of anti-hypertensive medication
- 642 7. Hematology includes red blood cells, hemoglobin, platelet count, neutrophils and white blood cell differential absolutes. If neutrophils  $\leq 1 \times 10^9/L$  or  
643 platelets  $\leq 25 \times 10^9/L$ , the test frequency should be increased to once every 2 or 3 days. For subjects whose dose is interrupted or adjusted due to blood  
644 toxicity, hematology test should be performed every week.
- 645 8. Blood chemistry parameters include total protein (TP), albumin (ALB), globulin (G), A/G, blood glucose, urea nitrogen, creatinine, alkaline phosphatase  
646 (ALP), lactate dehydrogenase (LDH), total bilirubin, AST, ALT, calcium, phosphorus, magnesium, potassium, sodium, chloride, pancreatic amylase and  
647 uric acid. The frequency of blood chemistry test for subject with ALT or AST increase by over 3 times compared to baseline, or ALT or AST increase by  
648 over 2 times of baseline value should be increased (1-2 times/week). Creatinine clearance rate should be calculated by using the baseline creatinine  
649 values according to the formulas: for males:  $Ccr = (140 - \text{age}) \times \text{weight (kg)} / [72 \times \text{Scr (mg/dl)}]$  or  $Ccr = [(140 - \text{age}) \times \text{weight (kg)}] / [0.818 \times \text{Scr}$   
650  $(\mu\text{mol/L})]$ , and the unit of the creatinine clearance should be taken into consideration during the calculation, and that for females should be the calculated  
651 value according to the above formulas  $\times 0.85$ .
- 652 9. Coagulation includes prothrombin time (PT), activated partial thromboplastin time (APTT), thrombin time (TT), fibrinogen (FIB) and international  
653 normalized ratio (INR).
- 654 10. Urinalysis parameters include pH, specific gravity, protein, urinary casts, white blood cell, red blood cell, urine glucose and urine ketone. If urinary  
655 protein is in the level of ++ or above during the medication period, 24-hour urinary protein quantity should be tested within 1 week.
- 656 11. Pregnancy: All female patients of childbearing potential must complete blood pregnancy test at screening and within 30 days after EOT. Pregnancy test  
657 should be repeated for subjects with suspected pregnancy. This is not applicable for postmenopausal female subjects, but the date of menopause should  
658 be recorded instead.
- 659 12. 12 lead ECG parameters include PR interval, QRS time, QT interval, QTc, and diagnostics.
- 660 13. Thyroid function includes serum free triiodothyronine (fT3), serum free thyroxine (fT4) and thyroid stimulating hormone (TSH).
- 661 14. Echocardiography includes left ventricular ejection function and assessment.
- 662 15. Baseline tumor evaluation should be completed within 3 weeks before the first dose. CT/MRI Scans of check, abdomen and pelvis are required. Tumor  
663 evaluation shall be performed per RECIST 1.1. Baseline and follow up assessment should be performed by the same investigator using the same imaging  
664 method. Tumor evaluations shall be performed on C3D1, C5D1, and every D1 of every another cycle afterwards until PD. Tumor evaluation schedule  
665 and time window are calculated from C1D1, and it won't be affected by dose interruption. If tumor evaluation is not performed within 28 days of the last

- 666 dose, it should be completed at EOT/study withdrawal. Bone scan shall be performed at baseline for subjects with bone metastasis, and for subject with  
667 bone lesion at baseline, the local bone lesions should be followed up. For cases with suspected PD before the start of the next assessment, an additional  
668 tumor evaluation should be performed. For all the subjects with tumor response and withdraw from the study for reasons other than PD during the  
669 treatment, it is recommended to collect the verification information of tumor response by using the same methods as those at baseline and during the  
670 study. The efficacy data after the discontinuation of treatment including subsequent anti-cancer therapies, date of PD and death shall be recorded in the  
671 eCRF.
- 672 16. Subject randomization: after verifying subject's eligibility, site will log into the IWRS and randomize the subjects to treatment arm on Day-1. Subject  
673 randomization number will be obtained. At the same time, drug assignment is performed in IWRS. Each subject will be provided with a serial number  
674 and then receive a drug bottle with the same serial number. Site will take investigational product of the serial number from inventory and dispense them  
675 to the subjects in 2 days (on C1D1). Subjects should take 1<sup>st</sup> dose on C1D1.
- 676 17. Drug Assignment/Dispense/Return: subject should take care of all untaken drugs and drug containers and then return them to site during study visits. On  
677 Day-2 to Day -1, only subject randomization and drug assignment will be performed. Subject should start the 1<sup>st</sup> dose on C1D1. Subject should return  
678 the untaken drugs and containers of the previous cycle on D1 (date of visits) of each following cycle, and new drugs will be dispensed on the same day.  
679 If tumor evaluation shows PD for previous cycle and new drugs have been dispensed, subject needs to return all untaken drugs at the observation follow  
680 up after EOT. If lab results and previous AEs indicate that dose adjusting standard is met, (for dose adjustment from 5mg to 4mg), the subject needs to  
681 return to the investigational site and return all untaken drug. Site needs to log into the IWRS, adjust the dose and reassign drug serial number and  
682 dispense new drugs for the subject. If dose is adjusted from 4mg to 3mg, the site should log into the IWRS and record the dose adjustment. It's not  
683 necessary to reassign new drug serial number to the subject.
- 684 18. For administration method, see Protocol Section 6.2.
- 685 19. Concomitant Medications/Treatments: All Concomitant Medications within 21 days before randomization must be recorded in the case report forms  
686 (CRF), including: generic name of the drug and daily dose; reasons for using this medication; start and stop date of medication.
- 687 20. Adverse event (AE) should be collected from the time of the first dose to 30 days after EOT. AEs and laboratory abnormalities that recovered or  
688 unexplained need to be collected till their recovery or until they can be otherwise explained. SAE shall be collected from the signing of ICF to 30 days  
689 after the last dose. Only SAEs related to the study drugs should be collected on 30 days after the last dose.
- 690 21. Survival follow-up (telephone follow-up) should be performed every 2 months after EOT. All subsequent anti-tumor therapy and study-related SAEs  
691 shall be collected. For the subjects without PD, if the tumor evaluation results are available, the results during follow up shall be recorded in the CRF

692 until confirmation of PD. Record the date and cause of death (if applicable). Subjects who withdraw consent shall also enter into follow-up period. If the  
693 subjects clearly expressed his/her refusal to follow-up after the withdrawal of consent, he/she will terminate the study and no followed up for survival  
694 will be performed.

695 22. All follow up and data collection will be continued until the end of study.

696 23. Collection of biomarker samples: biomarker samples collection from the subjects are required at screening, but only samples of the randomized patients  
697 will be sent to the sponsor.

698

## 699 **5.1 Screening Examination and Qualification Form**

700 Signed ICF must be obtained before any study-specific assessment and procedure.

### 701 **Complete Medical History Should be Recorded During Screening:**

- 702 • Demographics:

703 Date of birth, gender, ethnic group/race, body weight and height;

- 704 • Previous medical history (previous medical history that meet the following  
705 standards should be collected):

706 Excluding the indications of the study drug; Conditions existing before signing  
707 the ICF; Medical conditions that are considered to be related with the study;

- 708 • Other baseline characteristics:

709 Baseline medical history related to disease factors of the patient including:

710 Diagnostic date, type and stage of CRC; K-Ras gene status (if unknown, it  
711 needs to be tested at screening); Time of the first diagnosis of metastatic  
712 disease;

713 Previous anti-cancer therapies: The start time and duration of previous  
714 medication of the first-line chemotherapy/second-line chemotherapy and  
715 follow-up treatment regimens (including the best effect of each line therapy,  
716 date of failure or PD of each line therapy, toxicities of Grade 3 or above);

717 Prior use of VEGF inhibitors or EGFR inhibitors (yes vs. no); ECOG  
718 Performance Status (the evaluation standard is specified in Appendix 1);

719 All the drug treatment and significant non-drug treatment used within 21 days  
720 before enrollment must be recorded in the case report forms (CRF), including:  
721 generic name of the drug and daily dose; reasons for using this medication;  
722 starting and stopping date of medication or whether the drug will be continued  
723 during the study.

## 724 **5.2 Subjects Enrollment Procedures**

725 All the subjects will be assessed by the screening criteria. And the investigator should  
726 complete the IWRS worksheet to record the screening by login the IWRS through the  
727 internet.

728 The judgment for previous history of chemotherapy and inclusion criteria 3 during  
729 screening should be medically verified and confirmed by the sponsor before

730 randomization. Subjects meeting all the eligibility criteria will be randomized. The  
731 subject will get a randomized number, and participate in the study.

732 Subjects withdraw from the study after signing the ICF and before the randomization  
733 will be considered as ‘screening failure’. Subjects who failed to the prior screening  
734 can be screened again, and then receive a new subject number re-assigned by IWRS.  
735 In this case, the sponsor is required to review their medical histories one by one. A  
736 subject can only be re-screened once.

## 737 **5.3 Clinical Assessment**

### 738 **5.3.1 Efficacy**

#### 739 **5.3.1.1 Efficacy Endpoints**

740 Primary Efficacy Endpoint:

- 741 • OS

742 Secondary Efficacy Endpoints:

- 743 • PFS (as per RECIST v1.1)
- 744 • ORR (According to RECIST Version 1.1)
- 745 • DCR, of which SD  $\geq$ 8weeks ( $\pm$ 3 days)
- 746 • Duration of response and SD

#### 747 **5.3.1.2 Efficacy Assessment**

748 Tumors should be evaluated according to the standard of RECIST Version 1.1, and the  
749 evaluation criteria are specified in Appendix 2. Either CT or MRI Tumor imaging  
750 evaluation method can be used at the discretion of the investigator, but PET scan as  
751 imaging evaluation method is unacceptable. The evaluation methods, machines used  
752 and technical parameters (include thickness of scan plies) should be consistent in the  
753 entire study period; if no contraindications are implicated, contrast agents should be  
754 used; the evaluation should be performed by the same investigator/imaging experts.  
755 The result of tumor evaluation performed within 21 days prior to the first dose in the  
756 same hospital using the same method can be used as baseline tumor evaluation result.  
757 Baseline tumor evaluation should include the chest, abdomen, pelvis, and any other  
758 site with suspected tumor lesions. For patients with bone metastases, bone scan should  
759 be used for the follow up of the lesion, and the scan plies is 5mm.



760 Record of target lesions: number of lesions, site, description, maximum diameter of  
761 each lesion (except lymph nodes) and lymph nodes minimum diameter, including the  
762 total length of all target lesions.

763 Tumors will be evaluated using imaging method every 8 weeks after receiving  
764 treatment, until the occurrence of PD. Should the subject interrupt the medication due  
765 to AEs or other reasons, tumor evaluation should be conducted as scheduled. If the  
766 subject has premature termination of the treatment for any reason without receiving  
767 tumor evaluation, a timely imaging examination and tumor evaluation are  
768 recommended. For suspected cases of PD before the start of the next evaluation,  
769 additional tumor evaluation should be performed.

770 To achieve more accurate tumor evaluation results, all the subjects' CT or MRI will  
771 be delivered to a third party for independent evaluation in addition to the evaluation of  
772 the investigator, but the other evaluation will not affect the investigator's judgment.

### 773 **5.3.2 Performance Status**

774 ECOG PS score: ECOG PS score throughout the entire study period is recommended  
775 to be conducted by the same investigator at baseline and at each visit. Details are  
776 specified in Appendix 1.

### 777 **5.3.3 Clinical Safety Assessment**

#### 778 **5.3.3.1 Safety Endpoints**

779 Safety endpoints include adverse events, laboratory results (hematology, clinical  
780 chemistry, clinical urinalysis and stool for occult blood), vital signs (blood pressure,  
781 heart rate, respiratory rate, and temperature), weight, electrocardiogram (ECG) and  
782 echocardiography (UCG).

783 Comprehensive safety of the two groups will be assessed by severity and incidence of  
784 AEs, and classified in accordance with the NCI CTC AE Version 4.0. Safety  
785 endpoints include:

- 786 • The overall incidence of Treatment Emergent Adverse Events (TEAEs);
- 787 • The incidence of AEs of Grade 3 and above;
- 788 • The incidence of SAEs;
- 789 • The incidence of AEs leading to permanent drug discontinuation; and
- 790 • The incidence of AEs resulting in drug interruption or dose adjustment.

791 **5.3.3.2 Assessment of AEs, Safety Laboratory Parameters and Other Test**  
792 **Results**

793 The clinical safety of the study treatment should be evaluated according to NCI CTC  
794 AE Version 4.0 throughout the study period. The occurrence of adverse events of the  
795 subjects should be assessed at each clinical visit. The start time of AE, the highest  
796 degree of NCI CTC AE, end time, and its causality to the investigational products,  
797 impact to the study, whether additional treatment is given, and recovery should be  
798 recorded in the electronic case report form (eCRF).

799 Physical examination should be performed at baseline and at each visit, or its  
800 frequency should be increased according to clinical indications. Physical examination  
801 parameters should include vital signs (heart rate, blood pressure, body temperature  
802 and respiration), body weight and other related organ systems.

803 12-lead ECG examination should be performed at baseline, on Day 1 of each  
804 treatment cycle (except for Cycle 1) and 30 days after EOT. Echocardiography  
805 examination should be performed at baseline and on Day 1 of the second treatment  
806 cycle. Carcino-embryonic antigen (CEA) examination should be performed at  
807 baseline, on Day 1 of each treatment cycle (except for Cycle 1) and 30 days after  
808 EOT.

809 Hematology tests and urinalysis should be performed at baseline, treatment period and  
810 the observation period after EOT according to the study schedule.

811 Test parameters should include:

- 812 • Hematology: red blood cells, hemoglobin, neutrophils, platelet count and WBC  
813 classification; thrombin time (TT), prothrombin time (PT), activated partial  
814 thromboplastin time (APTT), fibrinogen (FIB ) and international normalized ratio  
815 (INR);
- 816 • Urinalysis: pH, specific gravity, protein, urinary casts, white blood cell  
817 (quantified), red blood cell (quantified), urine glucose and urine ketone;
- 818 • Stool for occult blood test;
- 819 • Blood clinical biochemistry: total protein (TP), albumin (ALB), globulin (G),  
820 A/G, blood glucose, urea nitrogen, creatinine, alkaline phosphatase (ALP), lactate  
821 dehydrogenase (LDH), total bilirubin, AST, ALT, calcium, phosphorus,  
822 magnesium, potassium, sodium, chloride, amylase and uric acid;
- 823 • Routine thyroid function test: should at least include serum free triiodothyronine  
824 (fT3), serum free thyroxine (fT4) and thyroid stimulating hormone (TSH);

- 825 • 12-lead ECG: including PR interval, QRS time, QT interval, QTc, and diagnosis;  
826 • Particular attention should be paid to left ventricular ejection function evaluation  
827 in the echocardiography examination.

## 828 **5.4 Biomarker Exploratory Study**

### 829 **5.4.1 Biomarker Observation Endpoints**

830 Fruquintinib is a tyrosine kinase inhibitor that blocks the tumor growth by inhibiting  
831 tumor angiogenesis. The biomarker study will be conducted to investigate whether  
832 there is any biomarker that can predict the efficacy of Fruquintinib in combination  
833 with BSC for the treatment of patients with advanced colorectal cancer through  
834 retrospective analysis. The biomarker study will be planned to use only tumor biopsy  
835 specimens.

836 Biomarker analysis can be classified as ‘nongenetic’ (such as related protein) or  
837 ‘genetic association’ (such as related RNA or DNA). In the current study, it is planned  
838 to perform the analysis with nongenetic and genetic association. The subjects will be  
839 required to sign a separate ICF so that their specimens can be used for gene analysis.  
840 During the biomarker analysis, the subject’s personal information should be protected  
841 to the full extent. For the collection, disposition and transportation of the biomarkers,  
842 see the Laboratory Guidance (provided separately).

843 All the subjects are required to provide previously archived diagnostic biopsy  
844 specimens for biomarker analysis, but a specific biopsy is not necessary. Subjects can  
845 still enter into the study even though they refuse to provide biomarker specimens or  
846 their analysis specimens are unavailable.

### 847 **5.4.2 Specimen for Biomarker Analysis and Time of Collection**

848 *The specimens for biomarker analysis are biopsy specimens:*

- 849 - Biopsy specimens obtained from previously preserved ones for diagnostic  
850 purpose or by other means should be provided by the subjects during  
851 screening. The genetic and nongenetic detections can be completed by using  
852 the biopsy specimens obtained during screening. Therefore, to complete those  
853 two detections, there is no need to collect biopsy specimen repeatedly. Gene  
854 detection will be conducted only by using the biopsy specimens from subjects  
855 who have signed the separate ICF.

856 *Acceptable biomarkers include:*

857 Tumor biopsy specimens can be used to determinate the expression and

858 mutation (e.g. K-ras mutation, vascular endothelial growth factor and vascular  
859 endothelial growth factor receptor, etc.) as DAN origin. Biopsy specimen can  
860 also be used for quantitative determination of the expression of protein (e.g.  
861 VEGF, HIF-1, etc.) of special interest, so as to investigate the features of the  
862 protein related to drug efficacy.

863 In addition to the above protein and gene listed, other biomarkers possibly  
864 related to this study can also be detected. However, the sponsor reserves the  
865 right of not perform all or partial of analysis of the above gene biomarkers.  
866 The results obtained from the analysis can be associated to those obtained  
867 from this study (e.g. clinical efficacy, toxic reactions, etc.).

868 Subjects can still be enrolled in the study if he/she refuses to provide  
869 biomarker specimens or have no biomarker specimens suitable for biomarker  
870 detection and analysis.

## 871 **6 Investigational Products and Administration**

### 872 **6.1 Investigational Products**

#### 873 **6.1.1. Drugs Provider**

874 The study drug Fruquintinib capsule and the matching placebo used in this study will  
875 be provided by the sponsor.

#### 876 **6.1.2. Specifications and Storage Life of the Investigational Products**

877 Fruquintinib and matching placebo will be manufactured and packaged by the  
878 GMP-certified company authorized by the sponsor. The sponsor should be responsible  
879 for the technical guidance and quality control.

#### 880 **Table 3 Information of the Investigational Products**

| Name               | Dosage Form | Specification | Administration Method | Storage Life |
|--------------------|-------------|---------------|-----------------------|--------------|
| Fruquintinib       | Capsule     | 5mg           | Oral                  | 2 years      |
| Fruquintinib       | Capsule     | 1mg           | Oral                  | 2 years      |
| Matching placebo*  | Capsule     | 5mg           | Oral                  | 2 years      |
| Matching placebo * | Capsule     | 1mg           | Oral                  | 2 years      |

881 *\*: The appearance of the matching placebo is identical to that of the study drug.*

**882 6.1.3. Labeling of the Investigational Products**

883 For details of sample packaging and labeling, see the Investigator Site File. The drug  
884 number on the packaging of the investigational products should be unique.

885 Re-supply of investigational products during the study will be managed by the IWRS  
886 system, and details are specified in the IWRS manual.

**887 6.1.4. Storage of the Investigational Products**

888 All the investigational products shall be stored in a closed, safe and cool place  
889 according to the requirements. The storage temperature shall be between 10°C-30°C,  
890 and the actual temperature should be documented and kept in the corresponding file.

891 All the investigational products provided are for research use only in this study.

**892 6.1.5. Randomization of the Investigational Products**

893 Subjects who meet all the inclusion and exclusion criteria confirmed by the  
894 investigator will enter the Interactive Web Response System (IWRS). The eligible  
895 subjects will be randomized according to the blinding principles at a ratio of 2:1 to  
896 receive either Fruquintinib in combination with BSC or matching placebo in  
897 combination with BSC. Randomization will be stratified according to the stratified  
898 factors: include previous use of VEGF inhibitor (yes vs. no), K-Ras gene status (wild  
899 type vs. mutant type). The randomized number of each subject will be provided to the  
900 investigator by IWRS.

901 And the subject shall start the treatment within 2 days after randomization.

**902 6.1.6. Investigational Products Accountability**

903 The investigator/pharmacist/staff responsible for the investigational products  
904 accountability must keep record of the drugs sent to the site, inventory quantity in the  
905 central inventory, drug quantity consumed by each subject, and return all of the  
906 remaining drugs to the sponsor or destroy the drugs according to the requirements.

907 Records described above will include the date, quantity, serial number (drug number),  
908 expiration date (used before XXXX) and the investigational products and the patient's  
909 unique study number. In addition, while returning the remaining drugs to the sponsor,  
910 the investigator/pharmacist/staff responsible for investigational products  
911 accountability should make sure that the subjects have returned all the unused drugs  
912 (well packaged) or remaining drugs (with packages already opened) , and that there is  
913 no remaining investigational products s at the site.

914 Drugs used by each subject will be calculated according to the formula: drugs used =  
915 drug dispensed - drugs returned - drugs lost.

**916 6.1.7. Investigational Products Disposition**

917 All remaining investigational products and the unused drugs collected from the  
918 subjects after the end of study should be returned to the sponsor for destruction; if  
919 destruction is performed by the site, the following written documents should be  
920 provided:

- 921 • Disposing of drug identification (drug number or subject treatment assignment).
- 922 • Number of disposing
- 923 • Method of disposing
- 924 • Signature and date of the person (or institution) responsible for drug disposing.

## 925 **6.2 Administration Method**

### 926 **6.2.1 Dosage and Cycle**

927 Treatment group: The subjects will receive oral Fruquintinib 5mg, QD for 3  
928 consecutive weeks and then the medication will be interrupted for 1 week. One  
929 treatment cycle is 28 days.

930 Control group: The subjects will receive oral matching placebo 5mg, QD for 3  
931 consecutive weeks and then the medication will be interrupted for 1 week. One  
932 treatment cycle is 28 days.

933 Subjects will receive double blinded study treatment orally according to their dose  
934 regimens until the occurrence of PD, death, intolerable toxicity, or withdrawal of  
935 informed consent, and conditions that requires for treatment termination such as  
936 subject should discontinue the treatment judged by the investigator for the subject's  
937 best interests.

### 938 **6.2.2 Mode of Administration**

939 The drugs should be taken at fasting state with 100-200 mL of tepid water. Each  
940 subject should record in the patient diary the date of drug administration and amount  
941 of drugs taken. And it is recommended to take the drugs 1 hour before or 2 hours after  
942 breakfast.

943 During the study, every effort should be made to ensure that the subject take the drugs  
944 according to the protocol. Should the subject miss the dose in the morning, the missed  
945 dose can be taken on the same day at any time before 18:00. However, if the subject  
946 misses one dose, and failed to take it in the same day, he/she must take the next  
947 prescribed dose on time, and the missed dose will no longer be taken. Missing dose  
948 must be recorded in the administration diary, and on the CRF/eCRF.

949 Smoking, alcohol and caffeinated beverages should be prohibited during the study.  
950 Grapefruit, pomelo or drinks containing the above fruits should be avoided during the

951 study (see Appendix 3).

## 952 **6.3 Dose Adjustment During the Study**

### 953 **6.3.1 Treatment Principles for Toxicities During the Study**

954 If subjects experience any toxicity during the study, the treatment of toxicity, drug  
955 interruption and dose reduction must comply with the following principles. Treatment  
956 of toxicity possibly related with Fruquintinib is specified in Section 6.3.2. And dose  
957 adjustment due to Fruquintinib related toxicities is specified in Section 6.3.3.

- 958 • Should intolerable toxicity occur during the study treatment period, drug  
959 interruption should be considered firstly; if the toxicity returns to baseline within  
960 14 days, the dose can be continued or reduced to the last previous dose (for  
961 detailed dose adjustment information, see Table 4, Table 4-1 through Table 4-6 in  
962 Section 6.6.3); if the toxicity cannot be recovered to baseline within 14 days, it  
963 should be considered as the end of the treatment period, and the subject should  
964 enter follow-up period;
- 965 • Should several AEs occur at the same time, the dose should be adjusted based on  
966 the most serious one;
- 967 • The time of drug interruption should not be too long, in principle, medication can  
968 be continued when the toxicity returned to Grade 1 or baseline level;
- 969 • In each dosing cycle, the dose can be adjusted at any time according to the  
970 intolerable toxicity. The dose reduced cannot be adjusted again to the previous  
971 level; A maximum of two dose adjustments is allowed for each subject (dose can  
972 be reduced to 4 mg QD “3 wks on/ 1 wk off” at the first time, and 3mg QD “3  
973 wks on/ 1 wk off” at the second time); if the dose is adjusted to 3mg QD “3 wks  
974 on/ 1 wk off”, other dose adjustment is not allowed, but dose interruption is  
975 allowed.
- 976 • Should dose interruption or dose reduction occur, the treatment cycle will not be  
977 adjusted in principle. Total drug administration should not exceed 21 days while  
978 continuous drug interruption should not exceed 14 days. Should drug interruption  
979 is between 7-14 days during the study treatment period in 1 cycle, a  
980 complementary drug administration of no more than 5-day doses can be  
981 considered in the first 5 days of drug interruption period (in the last 7 days), but

982 drug administration is not allowed in the last 2 days of the drug interruption  
983 period.

### 984 **6.3.2 Treatment of Toxic and Side Effects Possibly Related to Fruquintinib**

985 The toxic and side effects possibly related to Fruquintinib according to the  
986 investigator shall be treated with corresponding intervention measures by following  
987 the treatment principles in Section 6.3.1. The results of Phase I study  
988 (2009-013-00CH1) and Phase Ib study (2012-013-00CH3) have indicated that  
989 Fruquintinib-related adverse reactions mainly include Hand Foot Syndrome (HFS),  
990 hypertension, proteinuria, diarrhea, stomatitis, thrombocytopenia, elevated TSH,  
991 fatigue, hoarseness and rash, etc.

#### 992 **Treatment of Hypertension**

993 ✓ For the treatment principle of anti-hypertensive drugs for mild and moderate  
994 hypertension, see the Hypertension Treatment Guidelines (Appendix 6);

995 ✓ For the treatment of severe hypertension, please refer to the following procedures:  
996 When diastolic BP increases to  $\geq 110$ mmHg or systolic BP increases to  
997  $\geq 180$ mmHg, the following procedures should be followed:

- 998 1. Interrupt the investigational product;
- 999 2. Use positive anti-hypertensive therapy;
- 1000 3. If damage in target organ occurs, venous anti-hypertensive treatment shall be  
1001 provided in addition to oral treatment.
- 1002 4. If hypertensive crisis occurs, invite relevant experts and personnel to perform  
1003 BP stabilization and even rescue treatment for the subject;
- 1004 5. Consider re-administration of the investigational product when subject BP is  
1005 reduced to  $< 140/90$ mmHg.

1006 The investigator should follow the dose adjustment schedule (see Table 4-3) for  
1007 hypertension occurred during the Fruquintinib treatment. Also, the investigator should  
1008 monitor hypertension and strongly recommend appropriate measures to effectively  
1009 control the occurrence of hypertension during the treatment. The selection of  
1010 antihypertensive drugs should be performed according to investigator's judgment by  
1011 referring to the hypertensive treatment guideline and combining with the opinions  
1012 from the cardiologists.

#### 1013 **Treatment of Proteinuria**



1014 If the subject urine protein was detected with 2+ in urinalysis test during the treatment,  
1015 please collect 24-hour urine for urine protein quantitation. If urinalysis or 24-hour  
1016 urine protein quantitation is assessed as NCI CTC AE Grade 1, close monitoring  
1017 should be performed; if Grade 2 proteinuria presented with 24-hour urine protein  
1018 quantitation <2g, close monitoring and active treatment should be provided; if  
1019 24-hour urine protein quantitation  $\geq$ 2g, interrupt the investigational product and then  
1020 continue treatment with reducing dose if toxicity recovers to lower than Grade 1  
1021 within 14 days; if toxicity does not recover to Grade 1 after 14 days of drug  
1022 interruption, the investigational product shall be terminated.

### 1023 **Treatment of Hand-foot Syndrome (HFS)**

1024 If the subject presents HFS  $\leq$ Grade 2, symptom treatment can be provided. Hands and  
1025 feet shall avoid friction, pressure and contact with high temperature objects. Keeping  
1026 the skin of hands and feet moist and using appropriate uremic frost or cream  
1027 containing lanolin oil is beneficial for symptom alleviation and focus recovery.  
1028 Subjects with severe symptoms (especially with pain) can apply Shaoshang Zhitong  
1029 Ruangao (produced by Wuhan Jianmin Pharmaceutical Groups Corp. LTD and  
1030 provided by the sponsor) or take oral Diclofenac Sodium Enteric-coated Tablets  
1031 (Voltaren), etc. for symptom alleviation.

1032 If any subject presents HFS of Grade 3 or above (severe skin reaction including  
1033 exfoliation, blister, edema with pain, which affect daily activities), the drug should be  
1034 interrupted in accordance with the treatment principle in Section 6.3.1. Drug of  
1035 previous or reduced dose can be continued if toxicity recovers to lower than Grade 1  
1036 within 14 days.

### 1037 **Treatment of Diarrhea**

1038 If any subject presents diarrhea of Grade 1-2, either close monitoring or drug  
1039 therapies for intestinal functions improvement is acceptable; if diarrhea of Grade 3  
1040 occurs, Loperamide Hydrochloride Capsules (Imodium) and/or other drugs for  
1041 improvement of intestinal functions can be used. The event generally will recover in 3  
1042 days, and if so, the drug can be continued; for subject fails to recover within 3 days,  
1043 the drug shall be interrupted.

### 1044 **Treatment of Mucositis**

1045 If any subject presents stomatitis of Grade 1-2 (including oral ulcers, mucositis,  
1046 gingivitis, throat discomfort and angular cheilitis, etc.), local application of antibiotics

1047 (including anaerobic bacteria resistant antibiotics), antifungal agents, mucosal  
 1048 protective agents, local anesthetics, oral antacids as well as Xiguashuang Spray and  
 1049 Yinhuang Jiedu Pian for oral treatment is acceptable, and the investigational product  
 1050 can be continued. Drugs containing iodine and long-term use of hydrogen peroxide  
 1051 should be avoided; soft and nonirritating diet is recommended while spicy, acid and  
 1052 irritating food should be avoided. If the subject cannot swallow food or take liquid  
 1053 diet, parenteral liquid or nutrition support may be needed.

1054 If stomatitis does not recover after treatment and food intake and body weight are  
 1055 affected, the investigational product should be discontinued; continuous drug of  
 1056 previous or reduced dose shall be considered if toxicity recovers to Grade 1 within 14  
 1057 days.

#### 1058 **Treatment of Hypothyroidism and TSH Elevation**

1059 If any subject presents hypothyroidism (with or without clinical symptoms) with  
 1060 clinical diagnostic significance, or continuous TSH elevation with clinical symptoms  
 1061 (with or without decrease of T4), hormone replacement therapy (HRT) is  
 1062 recommended.

#### 1063 **Treatment of Decreased Platelet Count**

1064 If any subject presents decreased platelet count ( $<70 \times 10^9/L$ ), drug interruption and  
 1065 dynamic observation are recommended; if there is bleeding tendency or the platelet  
 1066 count level fails to recover to Grade 1 or baseline level after 3 days of drug  
 1067 interruption, active treatments for platelet elevation are recommended; infusion of  
 1068 platelet suspension is also suggested for subjects with decreased platelet count of  
 1069 Grade 4.

1070 **Treatment of other toxic and side reactions** shall be performed in accordance with  
 1071 the above-mentioned principles for toxicities. Appropriate process and treatment  
 1072 should be provided for the subjects' best interests.

### 1073 **6.3.3 Standard for Dose Adjustment Induced by Investigational Products**

#### 1074 **Related Toxicities**

1075 Should drug-related toxicities occur, the toxicity shall be classified according to NCI  
 1076 CTC AE Version 4.0. And dose of the Investigational Products should be adjusted  
 1077 according to the following preset doses:

|              |     |                                    |
|--------------|-----|------------------------------------|
| Dose Level 0 | 5mg | Fruquintinib of 5mg, 1 capsule, or |
|--------------|-----|------------------------------------|

|                                           |                   |                                                                              |
|-------------------------------------------|-------------------|------------------------------------------------------------------------------|
| (Original dose)                           | once daily        | 1 capsule of the matching placebo                                            |
| Dose Level -1<br>(the 1st dose reduction) | 4mg<br>once daily | Fruquintinib of 1mg, 4 capsules,<br>or 4 capsules of the matching<br>placebo |
| Dose Level -2<br>(the 2nd dose reduction) | 3mg<br>once daily | Fruquintinib of 1mg, 3capsules, or<br>3 capsules of the matching placebo     |

1078

1079 The investigational products related toxicities and corresponding dose adjustment  
1080 regimens are specified in Table 8, among which, toxicities of HFS, proteinuria,  
1081 hypertension, decreased platelet count, bleeding, and abnormal liver function are  
1082 excluded from that in Table 4 but listed respectively in Table 4-1 to Table 4-6  
1083 specially.

1084 **Table 4 Dose Adjustment Induced by Investigational Products Related Toxicities**

1085 (excluding HFS, proteinuria, hypertension, decreased platelet count, bleeding, and  
1086 abnormal liver function)<sup>a</sup>

| Grade of AE (NCI CTCAE Version 4.0) | Drug Interruption                                                           | Dose Adjustment                   |
|-------------------------------------|-----------------------------------------------------------------------------|-----------------------------------|
| Grade 1                             | drug administration as scheduled                                            | No adjustment                     |
| Grade 2                             | drug administration as scheduled                                            | No adjustment                     |
| Grade 3 <sup>b</sup>                | Interrupt the dose until the toxicity returns to ≤Grade 1 or baseline level | Reduce the dose to the last level |
| Grade 4                             | Treatment termination                                                       | Treatment termination             |

1087 a: Should any artery thrombosis occur, the treatment should be terminated.

1088 b: including Grade 3 diarrhea and stomatitis, etc. that ineffectively treated by drug therapies, but  
1089 excluding Grade 3 menstrual cycle extension.

1090 **Table 4-1 Dose Adjustment for HFS**

| AE Grading Standard                                                                                                                                                                       | Dose Adjustment                                             | Treatment Opinions                                                                                       |
|-------------------------------------------------------------------------------------------------------------------------------------------------------------------------------------------|-------------------------------------------------------------|----------------------------------------------------------------------------------------------------------|
| Grade 1: numb, paresthesia, dysesthesia, erythema, painless edema, desquamation, thicken skin and hand and foot discomfort which does not affect the normal activities; without any pains | Continue drug treatment with the same dose                  | Active supportive treatment can be adopted to relieve the symptoms; for example, urea cream can be used. |
| Grade 2: erythema with pains accompanied by hand and foot                                                                                                                                 | The drug can be interrupted; and the drug can be reduced to | Shaoshang Zhitong Ruangao manufactured by Wuhan                                                          |

|                                                                                                                                      |                                                                                                                                                                                         |                                                                                                                       |
|--------------------------------------------------------------------------------------------------------------------------------------|-----------------------------------------------------------------------------------------------------------------------------------------------------------------------------------------|-----------------------------------------------------------------------------------------------------------------------|
| swelling and /or discomfort, which affects normal activities                                                                         | the last dose level should the AE recovers to Grade 1 within 14 days                                                                                                                    | Jianmin Pharmaceutical Group Co, Ltd. is recommended.                                                                 |
| Grade 3: wet desquamation, ulcer, blister or severe hand and foot pain or severe discomfort which affects work or normal activities. | The drug can be interrupted and then resumed or reduced should AE recover within 7 days; the drug should be reduced to the last dose level if the AE recovers to Grade 1 within 14 days | Should the same AE occur for 3 times or still occurs after 2 times of dose adjustment, the drug should be terminated. |

1091

1092 **Table 4-2 Dose Adjustment for Proteinuria**

| AE Grading Standard                                                                                                     | Dose Adjustment                                                                                                      | Treatment Opinions                                                                                                                                                             |
|-------------------------------------------------------------------------------------------------------------------------|----------------------------------------------------------------------------------------------------------------------|--------------------------------------------------------------------------------------------------------------------------------------------------------------------------------|
| Grade 1: Proteinuria + by the urinalysis; 24-hour urine protein quantitation < 1.0g                                     | Continue drug treatment with the same dose                                                                           | Active treatment can be adopted to relieve the symptoms; for example, urea cream can be used.                                                                                  |
| Grade 2: Proteinuria ++ by the urinalysis; 24-hour urine protein quantitation is between 1.0-2.0g (excluding 2.0g)      | Continue drug treatment with the same dose                                                                           | Active treatment and urinalysis should be performed (every 1 week), accompanied by nephrology consultation if necessary.                                                       |
| Grade 2: Proteinuria ++ or above by urinalysis; 24-hour urine protein quantitation is between 2.0-3.5g (excluding 3.5g) | The drug can be interrupted and then reduced to the last dose level should the AE recovers to Grade 1 within 14 days | Active treatment should be performed, accompanied by nephrology consultation if necessary;                                                                                     |
| Grade 3: 24-hour urine protein quantitation $\geq$ 3.5g                                                                 | The drug can be interrupted and then reduced to the last dose should the AE recovers to Grade 1 within 14 days       | Active treatment should be performed, accompanied by nephrology consultation if necessary; and the drug should be terminated should the AE occur for the 3 <sup>rd</sup> time. |

1093

1094 **Table 4-3 Dose Adjustment for Hypertension (patients that receiving**  
1095 **anti-pressure treatment at baseline should monitor blood pressure after**  
1096 **antihypertensive drug administration once daily)**

| AE Grading and Definitions                                     | antihypertensive therapy | Dose of Fruquintinib                           |
|----------------------------------------------------------------|--------------------------|------------------------------------------------|
| Grade 1: prehypertension: (systolic pressure of 120-139mmHg or | None                     | Continue drug treatment of with the same dose. |

|                                                                                                                                  |                                                                                                                                                                                                                                                                                                                                                                                                                     |                                                                                                                                                                                                                                                                                                  |
|----------------------------------------------------------------------------------------------------------------------------------|---------------------------------------------------------------------------------------------------------------------------------------------------------------------------------------------------------------------------------------------------------------------------------------------------------------------------------------------------------------------------------------------------------------------|--------------------------------------------------------------------------------------------------------------------------------------------------------------------------------------------------------------------------------------------------------------------------------------------------|
| diastolic pressure of 80-89mmHg)                                                                                                 |                                                                                                                                                                                                                                                                                                                                                                                                                     |                                                                                                                                                                                                                                                                                                  |
| Grade 2: SBP of 140-159mmHg or DBP of 90-89mmHg; or DBP symptomatic increase >20mmHg                                             | Treatment objective: keep the BP at the level of lower than 140/90mmHg.<br>If the patient has received the antihypertensive treatment, the dose of the antihypertensive drug should be increased or adopt other antihypertensive therapies; If the patient does not receive any antihypertensive treatment, a single antihypertensive therapy should be used.                                                       | Continue drug treatment with the same dose.<br>For the use and dose adjustment of antihypertensive drugs, please refer to the antihypertensive drug treatment guideline and invite the nephrology for consultation if necessary.                                                                 |
| Grade 3: SBP of 140-159mmHg or DBP of 90-89mmHg; or DBP symptomatic increase by >20mmHg                                          | Treatment objective: keep the blood pressure at the level of lower than 140/90mmHg.<br>Start to use antihypertensive drug or increase the dose of the antihypertensive drug in use or adopt other antihypertensive therapies additionally; For the use and dose adjustment of antihypertensive drugs, please refer to the antihypertensive drug treatment guideline and ask the nephrologist for help if necessary. | For patient with BP exceeding 160/100mm Hg for more than 7 days after using antihypertensive drug or adjusting the dose of the drug in use, Fruquintinib should be interrupted; Should the BP of the patient recover to Grade 1 or the baseline level, one time of dose reduction shall be made. |
| Grade 4: Life threatening (such as malignant hypertension, temporary or permanent neurological deficits and hypertensive crisis) | Emergent medical treatment                                                                                                                                                                                                                                                                                                                                                                                          | The drug should be terminated.                                                                                                                                                                                                                                                                   |

1097

1098

**Table 4-4 Dose Adjustment for Decreased Platelet Count**

| AE Grading                                           | Dose Adjustment                                                                                                                                  | Treatment Opinions                                                                                                                                                                                    |
|------------------------------------------------------|--------------------------------------------------------------------------------------------------------------------------------------------------|-------------------------------------------------------------------------------------------------------------------------------------------------------------------------------------------------------|
| Grade 1: Platelet Count of $100\sim 75\times 10^9/L$ | Continue drug treatment with the same dose                                                                                                       | Perform follow up visit as scheduled.                                                                                                                                                                 |
| Grade 2: Platelet Count of $75\sim 50\times 10^9/L$  | The drug can be interrupted and continue the drug treatment with the same dose should the AE recovers to Grade 1 or baseline level within 7 days | Hematology examination should be performed every 2-3 days; active treatment for platelet elevation is recommended. Hematology examination should be performed once every week in the follow up visit. |

|                                                     |                                                                                                                                          |                                                                                                                                                                                                                                          |
|-----------------------------------------------------|------------------------------------------------------------------------------------------------------------------------------------------|------------------------------------------------------------------------------------------------------------------------------------------------------------------------------------------------------------------------------------------|
|                                                     | The drug can be interrupted and then reduced to the last dose level should the AE recovers to Grade 1 or baseline level within 7-14 days | Hematology examination should be performed every 2-3 days; active treatment for platelet elevation is recommended. Hematology examination should be performed once every week in the follow up visit.                                    |
| Grade 3: Platelet Count of $50\sim 25\times 10^9/L$ | The drug can be interrupted and reduced to the last dose level should the AE recovers to Grade 1 or baseline level within 14 days.       | Hematology examination should be performed every 2-3 days; active treatment of platelet elevation or infusion of platelets suspension is recommended. Hematology examination should be performed once every week in the follow up visit. |
| Grade 4: Platelet Count $<25\times 10^9/L$          | The study treatment should be terminated                                                                                                 | Hematology examination should be performed once daily until the AE recovers to Grade 2 or a lower grade; infusion of platelets suspension or other active treatment should be provided                                                   |

1099

1100 **Table 4-5 Dose Adjustment for Bleeding in Any Site**

| AE Grading       | Dose Adjustment                                                                                                                     | Treatment Opinions                    |
|------------------|-------------------------------------------------------------------------------------------------------------------------------------|---------------------------------------|
| Grade 1          | Continue drug treatment with the same dose                                                                                          | Perform follow up visit as scheduled. |
| Grade 2          | The drug can be interrupted and then reduced to the last dose level should the AE recover to Grade 1 or lower level within 14 days. | Active treatment                      |
| Grade 3 or above | The study treatment should be terminated.                                                                                           | Emergent medical intervention.        |

1101

1102 **Table 4-6 Dose Adjustment for Abnormal Liver Function (including clinically significant abnormalities such as increasing of ALT, AST or total bilirubin)<sup>a</sup>**  
1103

| AE Grading                           | Dose Adjustment                                                                                                                                      | Treatment Opinions                                                                                                        |
|--------------------------------------|------------------------------------------------------------------------------------------------------------------------------------------------------|---------------------------------------------------------------------------------------------------------------------------|
| Grade 1                              | Continue drug treatment with the same dose.                                                                                                          | Perform follow up visit as scheduled.                                                                                     |
| Grade 2 (with normal baseline value) | Drug interruption can be considered, and the dose should be reduced to the last dose level if the AE recovers to Grade 1 or baseline within 14 days. | Active liver protection treatment should be provided, and the liver function should be monitored closely once every week. |
| Grade 2 (with abnormal)              | Continue drug treatment with the same dose.                                                                                                          | Active liver protection treatment should be provided, and the liver function should be                                    |

|                 |                                                                                                                                   |                                                                                                                                                                                                                    |
|-----------------|-----------------------------------------------------------------------------------------------------------------------------------|--------------------------------------------------------------------------------------------------------------------------------------------------------------------------------------------------------------------|
| baseline value) |                                                                                                                                   | monitored closely once every week.                                                                                                                                                                                 |
| Grade 3         | The drug can be interrupted and then reduced to the last dose level should the AE recovers to Grade 1 or baseline within 14 days. | Active liver protection treatment should be provided, and the liver function should be monitored closely (twice every week until the toxicity recovers to Grade 1, baseline level or can be reasonably explained). |
| Grade 4         | The study treatment should be terminated.                                                                                         | Active liver protection treatment should be provided, and the liver function should be monitored closely (twice every week until the toxicity recovers to Grade 1, baseline level or can be reasonably explained). |

1104 a: Should total bilirubin  $>2\times$ ULN and/or aminopherase  $>3\times$ ULN occur in patients with normal  
 1105 baseline values, or total bilirubin  $> 2\times$ baseline value and/or aminopherase  $>3\times$  baseline value  
 1106 occurs in patients with abnormal baseline values, please report it as special event and provide  
 1107 treatment to the patient according to the Protocol.

#### 1108 **6.3.4 Treatment of Drug Overdose**

1109 If overdose (defined as administration of more than one dose within 24 hours, i.e.  
 1110 from 8 am to 8 am of the next day) occurs, symptomatic and supportive treatment  
 1111 should be provided.

1112 If the dose of the investigational product exceeds the dose specified in the study  
 1113 protocol, but with no corresponding symptoms or signs presents, it is required to  
 1114 report as protocol violation. If overdose accompanied by AE occurs, the AE shall be  
 1115 recorded in “AE Form”.

### 1116 **6.4 Blinding**

1117 The subjects will be randomized to either Fruquintinib treatment group or the  
 1118 corresponding placebo treatment group using double-blind method. The drug  
 1119 administered for treatment remains unknown for investigator, the sponsor and the  
 1120 subjects. The allocated randomized numbers are based upon the information provided  
 1121 by IWRS.

1122 Fruquintinib and its matching placebo present identical appearance to ensure the  
 1123 implementation of blinding and the subject shall take 1 capsule of 5mg, PO, QD. For  
 1124 the purpose of blinding, the investigational product (Fruquintinib or corresponding  
 1125 placebo) shall be marked by unique drug numbers which are pre-printed on each  
 1126 package bottle, and be distributed to each subject through the IWRS.

1127 Emergency unblinding: unblinding shall be performed only under emergency  
 1128 circumstances. On condition that unblinding is required for treating SAE of a certain  
 1129 subject, project leader from the sponsor must be contacted by PI in advance before  
 1130 unblinding. Unblinding of the subjects shall be performed by PI through IWRS

1131 system.

## 1132 **6.5 Concomitant Treatment**

1133 Subjects are not allowed to receive other antineoplastic treatment, including cytotoxic  
1134 drugs (except for non-antineoplastic chemotherapy), radiotherapy (except for  
1135 palliative radiotherapy for symptom control), biotherapy, endocrine therapy or any  
1136 other study treatment during the enrollment and the whole process of this study.  
1137 Traditional Chinese Medicine with antineoplastic indications is prohibited during this  
1138 study (see Appendix 3). Systemic antineoplastic treatment and treatment with other  
1139 investigational products must be terminated at least 4 weeks before the subject's  
1140 enrollment of this study.

## 1141 **6.6 Other Concomitant Treatments**

1142 The investigator should comply with the following guiding principles, cautiously  
1143 select concomitant medication during the study and make every effort to protect the  
1144 safety of the subjects.

- 1145 • According to the investigator's judgment, for the sake of subject's health, all  
1146 drugs with the expectation of not interfering with the study assessment can  
1147 be used. All the concomitant treatments (include start/end date, route and  
1148 indications) must be recorded in subject's original medical record and CRF.
- 1149 • Fruquintinib has been proved to be metabolized through hepatic cytochrome  
1150 P450 3A4 according to pre-clinical study. Strong inducers of enzyme  
1151 CYP3A4 such as Phenytoin, Phenobarbital, Rifampin and other drugs (not  
1152 limited to the above-mentioned drugs) as well as strong inhibitors of enzyme  
1153 CYP3A4 such as Ketoconazole, Itraconazole, Fluconazole, Indinavir,  
1154 Erythromycin, etc. (not limited to the above-mentioned drugs) may  
1155 significantly influence the in vivo metabolism of Fruquintinib. Investigators  
1156 should be cautious for enrollment of the subjects received confirmed  
1157 combination with inducers and inhibitors of enzyme CYP3A4. If  
1158 concomitant medication of the above type is applied during the study,  
1159 cautions are required as well as close monitoring of drug exposure and  
1160 adverse reactions. See Appendix 3 for detailed information.
- 1161 • Subjects are allowed to take anticoagulants (e.g. Warfarin) during the  
1162 treatment period while monitoring of relevant coagulation indicators such as  
1163 INR is required; LMWH Sodium is acceptable when required by the  
1164 treatment;

1165 All drugs used including the study drug during the process of treatment should be  
1166 recorded in the CRF/eCRF.



## 1167 **6.7 Treatment Compliance**

1168 The investigators should record the amount and date of investigational products  
1169 dispensing and collection, as well as actual dose of administration of each subject  
1170 timely and accurately. The actual dose of administration should be consistent with the  
1171 dose required in the Protocol. Drug treatment compliance shall be determined  
1172 according to the amount of drug dispensed and collected from each subjects and the  
1173 amount of drug lost by the subject at the end of each treatment cycle and at the time of  
1174 study withdrawal. And self-reported dose missing/overdose/drug losing etc. from the  
1175 subjects shall also be determined comprehensively.

1176 The patients are required to return all bottles of used and unused investigational  
1177 products to the site at the end of treatment for compliance assessment. All remaining  
1178 materials and drugs must be returned to the sponsor at the end of study.

## 1179 **7 Safety**

### 1180 **7.1 Safety Parameters and Definitions**

#### 1181 **7.1.1 Adverse Event (AE)**

1182 An Adverse Event (AE) is any untoward medical occurrence occurring after the  
1183 patient has received the medication, regardless of whether or not considered related to  
1184 the investigational products. Therefore, an AE can be any adverse or untoward sign  
1185 (including laboratory abnormalities), symptom or disease which has a temporal  
1186 relationship with the medication but is not necessarily related to the drug.

1187 In addition, AEs also include complications induced by medical intervention regulated  
1188 in the Protocol. For instance, complications induced by biopsy and other invasive  
1189 operations, and worsening of the disease that considered by the investigator as  
1190 pre-existed during AE reporting (except for tumor progression) are also considered as  
1191 AE.

#### 1192 **7.1.2 Serious Adverse Events (SAEs)**

1193 Serious adverse event (SAE) refers to any AE that meets at least one of the following  
1194 criteria:

1195 - **Results in death:** AE resulting in death of the subject, excluding death resulted from  
1196 PD, unless it was considered to be related to the use of test drug or administration  
1197 system according to the investigator;

1198 - **Is life-threatening:** this refers to an event in which the patient was at risk of death at  
1199 the time of the event. It does not refer to an event, which hypothetically might have  
1200 caused death, if it became more severe.

- 1201 - **Requires hospitalization or prolongation of an existing hospitalization:** AE  
1202 results in hospitalization treatment (not including emergency or outpatient treatment),  
1203 or that occurs during hospitalization of the subject and prolongs the existing  
1204 hospitalization;
- 1205 - **Results in persistent or significant disability or incapacity:** AE results in  
1206 substantial harm to the subject's capacity of conducting daily activities (incapacity  
1207 does not include events with secondary clinical significance, such as headache, nausea,  
1208 vomiting, diarrhea, influenza and accidental trauma (e.g. ankle strain, etc.);
- 1209 - **Is a congenital abnormality or birth defect:** A congenital abnormality or birth  
1210 defect exists in the newborn (fetus) or born (aborted) by a female subject with drug  
1211 exposure or the female companion of a male subject with drug exposure;
- 1212 - **Other important medical events:** An important medical event may not result in  
1213 immediate risk to life, death or hospitalization. However, it may jeopardize the  
1214 subjects or require immediate medical interventions such as drug or surgical  
1215 treatments to prevent the occurrence of the above-mentioned outcomes (death of  
1216 subjects, life-threatening, result in hospitalization, prolonged hospitalization, and  
1217 result in persistent or significant disability or incapacity and congenital abnormality).

### 1218 7.1.3 Special Events Stipulated in the Protocol

1219 The sponsor shall provide continuous close monitoring on potential drug-induced  
1220 liver damage even though it is rare.

1221 Close monitoring of blood biochemistry should be performed if the subject presents  
1222 the following condition:

1223 The subject presents elevation of ALT or AST over 3 times of the normal value with  
1224 normal transaminase at baseline, or elevation of ALT or AST over twice of baseline  
1225 value with increased transaminase at baseline, close monitoring of blood biochemistry  
1226 parameters (ALT, AST, ALP and TBiL) should be performed and the frequency of  
1227 monitoring should be increased (1-2 times/week);

1228 For subject presenting early symptoms of liver damage (such as anorexia, nausea,  
1229 vomiting, discomfort in upper right stomach, and fatigue, etc.) before detection of  
1230 abnormal blood biochemistry, immediate blood biochemistry test should be performed  
1231 and the frequency of monitoring should be increased if above-mentioned  
1232 abnormalities occur.

1233 Special events regulated by the Protocol are as follows:

- 1234 • Subjects presenting normal hepatic function (ALT, AST and bilirubin are all  
1235 within their normal ranges) at baseline is tested with AST and/or ALT  
1236 elevation  $>3\times\text{ULN}$  combined with TBiL elevation  $>2\times\text{ULN}$  by using the same  
1237 blood sample collected.
- 1238 • Subjects presenting increased transaminase at baseline is detected with AST

1239 and/or ALT elevation >twice of baseline value combined with TBiL  
1240 elevation >2×ULN by using the same blood sample collected.

1241 When subject presents the above-mentioned special events, close monitoring of blood  
1242 biochemistry parameters (ALT, AST, ALP and TBiL) should be performed and the  
1243 frequency of monitoring should be increased (1-2 times/week).

1244 In addition, for subject presenting early symptoms of liver damage (such as anorexia,  
1245 nausea, vomiting, discomfort in upper right stomach, and weakness, etc.) before  
1246 detection of abnormal blood biochemistry, immediate blood biochemistry test should  
1247 be performed. And frequency of monitoring should be increased if the requirements of  
1248 special events specified in the Protocol are met.

## 1249 **7.2 Safety Parameters Collection and Assessment**

### 1250 **7.2.1 Definition of AE Reporting Time**

1251 Table 5 Definition of AE Reporting Time

| Time Period                                                                                             | Reporting Requirements                                                    |
|---------------------------------------------------------------------------------------------------------|---------------------------------------------------------------------------|
| Since signing the ICF to the time before first administration of the investigational product            | Report all SAEs                                                           |
| Since administration of the first dose till 30days after the final dose of the investigational products | Record all AEs and SAE (including special events regulated by protocol).  |
| Post-treatment period (since 30 day after the final dose till the end of the study)                     | Report only SAE considered to be related to the investigational products. |

### 1252 **7.2.2 AE Severity Assessment**

1253 The severity of all AEs shall be graded into 5 grades (Grade 1 to Grade 5) in  
1254 accordance with NCI CTC AE V4.0. AEs not listed in NCI CTC AE shall be  
1255 determined according to the following table (Table 6).

1256 **Table 6 Determination of AE Severity**

| CTC Grading | Equivalent to | Definition                                                                                                                                                                                                     |
|-------------|---------------|----------------------------------------------------------------------------------------------------------------------------------------------------------------------------------------------------------------|
| 1           | Mild          | Discomforts are observed while regular daily activities not affected.                                                                                                                                          |
| 2           | Moderate      | Discomforts are sufficient to reduce or affect daily activities: treatment or medical intervention is not adopted, even though they are capable of improving life quality of the patient or relieving symptoms |

| CTC Grading | Equivalent to                      | Definition                                                                                                                                                                                                                              |
|-------------|------------------------------------|-----------------------------------------------------------------------------------------------------------------------------------------------------------------------------------------------------------------------------------------|
| 3           | Severe                             | Incapable of working or fulfilling daily activity, treatment or medical intervention has been adopted to improve life quality of the subject or relieve symptoms, treatment delay will not place the patient in immediate risk of death |
| 4           | Life-threatening or incapacitating | With immediate risk of death or permanent mental or physical damage, incapable of working or fulfilling daily activities, treatment or medical intervention is required to sustain life                                                 |
| 5           | Fatal                              | AEs resulting in death                                                                                                                                                                                                                  |

1257 The seriousness and severity of AEs should be differentiated. Severity refers to the  
 1258 intense extent of AEs (e.g. mild, moderate or severe headache) while the event itself  
 1259 presents comparatively slight clinical significance (e.g. severe headache) and cannot  
 1260 be determined as SAE unless it conforms to the criteria of SAE. Therefore,  
 1261 seriousness and severity should be evaluated independently during AE/SAE  
 1262 recording.

### 1263 7.2.3 Drug-event Relationship

1264 The relationship of the investigational product with AE and the role of the  
 1265 investigational products in AE can be classified as 4 categories of definitely unrelated,  
 1266 unlikely related, possibly related and definitely related. The following classification  
 1267 and criteria can be referred to for determination:

- 1268 1. Definitely unrelated: Other factors (other diseases, tumor progression,  
 1269 environment, or other drugs, etc.) are determined as the cause after medical  
 1270 judgment.
- 1271 2. Unlikely related: The investigational product is considered unlikely related to AE  
 1272 after medical judgment:
  - 1273 a) No temporal relationship exists between the drug application and occurrence  
 1274 of AE.
  - 1275 b) AE may be caused by other factors such as change of disease course,  
 1276 environment or use of other drugs for treatment.
  - 1277 c) Occurrence of AE is unrelated to the known characteristics of the drug.
  - 1278 d) AE does not recur or aggravate after investigational product  
 1279 re-administration.
- 1280 3. Possibly related: (the previous two items are a necessary condition) if the  
 1281 following conditions are met after medical judgment, AE is considered to be

- 1282 possibly related to the investigational product.
- 1283 a) Temporal relationship exists between the drug application and AE
- 1284 occurrence.
- 1285 b) The causality between AE and change of course of disease, environment or
- 1286 application of other drugs for treatment cannot be excluded.
- 1287 c) Occurrence of AE is consistent to the known characteristics of the drug.
- 1288 4. Definitely related: (the first 3 items are indispensable) if the following conditions
- 1289 are met after medical judgment, AE is considered to be related to the
- 1290 investigational product:
- 1291 a) Obvious temporal relationship exists between drug application and AE
- 1292 occurrence.
- 1293 b) AE cannot be interpreted by factors like change of disease course,
- 1294 environment or application of other drugs for treatment.
- 1295 c) AE disappears or relieves after dose reducing or drug interruption, and
- 1296 recurs after drug re-administration.
- 1297 d) Occurrence of AE is consistent to the known characteristics of the drug.
- 1298 During SAE report, if the SAE is judged as unlikely related or definitely unrelated,
- 1299 the investigator is required to provide other potential causes leading to the SAE. If the
- 1300 Investigator's judgment is possibly related or definitely related, reasonable possibility
- 1301 must be provided to explain that the SAE is caused by the investigational product.

### 1302 **7.3 Recording and Reporting of Safety Parameters**AE Recording

1303 During the AE reporting period stipulated in the Protocol, the investigator is

1304 responsible for collecting all AEs and recording them in the CRF/eCRF. In terms of

1305 AE recording, the investigators should use correct and normative medical terminology

1306 and avoid spoken language and abbreviations. The content of record should include

1307 the start time of AE, the highest degree of NCI CTC AE grading, end time, causality

1308 with the study drug, influence to the study, whether concomitant therapy exist and

1309 recovering conditions.

#### 1310 **Diagnosis vs. Symptoms and Signs**

1311 If diagnosis exists, the result should be recorded rather than single symptom and sign

1312 (e.g. record of hepatic dysfunction, rather than separate record of elevation of

1313 transaminase and asterixis; record of acute pancreatitis rather than separate record of

1314 the abdominal pain, abdominal distension, vomiting and elevation of amylase).

1315 However, if the symptoms and signs cannot be categorized as a single diagnosis

1316 during reporting period, each single event should be recorded as an AE. On condition

1317 that the diagnosis is confirmed afterwards, CRF/eCRF should be updated for

1318 diagnosis recording.

### 1319 **AEs Secondary to Other Events**

1320 Generally, the primary events should be recorded for AEs secondary to other events  
1321 (e.g. induced by other events or clinical sequelae), unless the secondary events present  
1322 more severe in severity or become SAEs.

1323 However, the secondary events with obvious clinical significance should be recorded  
1324 as independent AEs if they have different time of occurrence with the primary events.

1325 If the causality between the secondary events and primary events remains unclear they  
1326 should be recorded respectively.

### 1327 **Continuous, Intermittent or Single AE (Frequency of AE)**

1328 Continuous AE refers to an AE exists continuously through the whole process without  
1329 remission, for example, a continuous upper respiratory infection which lasts for 5  
1330 days. This type of AE should be recorded in the CRF/eCRF once only. The highest  
1331 grade of severity throughout the event should be recorded during severity assessment.

1332 Intermittent AE refers to an AE without outcome with obvious clinical significance  
1333 but presents occasional variation or remission in terms of symptoms, signs or  
1334 laboratory tests through the whole process, for example, nausea and vomiting  
1335 continuing for days and alleviates comparatively during the process; subjects with  
1336 hypertension presents comparatively continuous course of disease during multiple BP  
1337 tests despite of intermittent remission. This type of AE should be recorded in  
1338 CRF/eCRF for only one time. The highest grade of severity throughout the event  
1339 should be recorded during severity assessment.

1340 Single AE refers to an AE that can logically only occurs individually, or occurs only  
1341 once independently during the study, such as an accident of falling down that the  
1342 subject experiences during the period of drug administration or one occasional  
1343 vomiting that the subject experiences during the trial. This type of AE should be  
1344 recorded in the CRF/eCRF only once.

1345 It's important to note that if the above-mentioned AEs have presented recovery with  
1346 obvious clinical significance, and the subsequent identical AE is considered to have  
1347 no consistency in terms of disease course with the previous case, the two events  
1348 should be recorded respectively in the CRF/eCRF.

### 1349 **Laboratory Results and Vital Signs Abnormalities**

1350 All the results of laboratory tests can be recorded on the page for laboratory results in  
1351 the CRF. Not all the laboratory tests/vital signs abnormalities are required for AE

1352 recording. The Investigator is responsible for reviewing all the laboratory results and  
1353 vital signs abnormalities, and determining whether to record them as AE after medical  
1354 judgment. If any of the above-mentioned abnormalities present obvious clinical  
1355 significance, or at least one of the following conditions occur, AEs should be recorded:

- 1356 • Accompanied by clinical symptoms
- 1357 • Leading to change of study drug application (e.g. dose adjustment, interruption or  
1358 termination)
- 1359 • Require medical intervention or concomitant treatment alteration (e.g.: increase,  
1360 interruption, discontinuation or other change of concomitant medication,  
1361 treatment or process).
- 1362 • Having obvious clinical significance according to the investigator.

1363 If the laboratory results or vital signs abnormalities with clinical significance are the  
1364 representations (such as elevation of ALT/AST and hemobilirubin resulted from  
1365 damage of hepatic function) of a certain disease or syndrome, only the diagnosis  
1366 (damage of hepatic function) should be recorded in the AE Record of the CRF/eCRF.  
1367 Otherwise, the laboratory results or vital signs abnormalities should be recorded in the  
1368 AE Record of the CRF/eCRF and specify whether the tested value is higher or lower  
1369 than the normal range requires specification (e.g.: record as “serum potassium  
1370 elevation” rather than “serum potassium abnormality”). If standard clinical  
1371 terminology corresponding to the laboratory tests or vital signs abnormalities exists,  
1372 the terminology (e.g. serum potassium elevation up to 7.0 mmol/L should be recorded  
1373 as “hyperkalemia”) should be recorded in CRF/eCRF.

#### 1374 **Progressive Disease**

1375 Event definitely consistent with the anticipated progression pattern of primary tumor  
1376 should not be considered as AE. Hospitalization induced by simply PD is not  
1377 considered as an SAE. If symptoms cannot be confirmed to be completely induced by  
1378 PD or does not consist with the anticipated progression pattern of tumor, the relevant  
1379 clinical symptoms can be recorded as AE.

#### 1380 **Death**

1381 As for the recording of death event, if AEs leading to death exist, they should be  
1382 recorded in the CRF/eCRF and the event should be considered as SAE for expedited  
1383 reporting. If the cause of death remains unknown, “cause of death unknown” should  
1384 be recorded in firstly CRF/eCRF and considered as SAE for expedited reporting and  
1385 then the exact cause of death should be investigated further. The record/report should

1386 be updated when the cause of death is confirmed.

### 1387 **Pre-existing Medical Conditions**

1388 The pre-existing condition of subject during the study screening shall be recorded as  
1389 AE only if the degree of severity, frequency and nature has worsened (except for  
1390 deterioration of the disease under study) after enrollment. Change from the previous  
1391 condition should be documented in the record, such as “increased frequency of  
1392 headache”, ‘hypertension exacerbation’, etc.

### 1393 **Hospitalization or Prolonged Hospitalization**

1394 Any AE leading to hospitalization or prolonged hospitalization should be recorded  
1395 and reported as SAE, except for the following conditions:

- 1396 • Scheduled hospitalization or prolonged hospitalization as required by the Protocol  
1397 (e.g. for drug administration and efficacy assessment, etc.)
- 1398 • Hospitalization due to pre-existing and unchanged medical condition before  
1399 participation in the study, such as scheduled selective surgery or treatment before  
1400 enrollment of the study; subject hospitalization as scheduled to receive surgery or  
1401 other treatments during the study shall not be considered as AE.

### 1402 **Surgery**

1403 If the surgery-treated disease is cleared out, this disease should be recorded as AE, but  
1404 not surgery itself (e.g. subject experiences the inguinal hernia repair, AE should be  
1405 recorded as ‘inguinal hernia’, but not ‘inguinal hernia repair’); if the cause of surgery  
1406 is unknown, the surgery can be recorded as AE (e.g. for subject experiences  
1407 abbreviated laparotomy, abbreviated laparotomy can be recorded as AE).

### 1408 **Pregnancy**

1409 If female subject becomes pregnant during the study, the IP should be terminated  
1410 immediately and the investigator should be informed. The Investigator should report it  
1411 to the Sponsor within 24 hours, and discuss the risk of pregnancy continuation and  
1412 potential impact on the fetus with the subject. Monitoring of the subject should be  
1413 continued to the end of pregnancy. All pregnancies within 30 days after the last dose  
1414 of the IP should be reported to the Investigator.

1415 Abortion should be recorded and reported as SAE whether it is artificial or  
1416 spontaneous. Any congenital abnormality/birth defect of the infant born by female  
1417 subject or female partners of male subjects that have used the IP should be recorded  
1418 and reported as SAE.

### 1419 **7.3.2. Expedited Reporting of SAEs**

Hutchison Medi Pharma Ltd.  
Simplified Chinese Protocol Version 3.0, dated 24 Nov 2014  
Translated from Simplified Chinese to English on 5Dec2014 by Kuntuo  
English Protocol Version 3.0, dated 5Dec2014

Confidential



1420 If any SAE is discovered by the investigator during the course of study, regardless of  
1421 whether it is related to the investigational product, a finished SAE Report should be  
1422 submitted to drug administration of relevant province, autonomous region and  
1423 municipality as well as China Food and Drug Administration (CFDA), informed of  
1424 the sponsor and reported immediately to Ethics Committee within 24 hours after  
1425 awareness of the SAE. The Investigator should finish and submit the follow-up report  
1426 within the same time limit after obtaining the follow-up information. When a  
1427 non-serious adverse event progresses into an SAE, the SAE and relevant follow-up  
1428 report should also be reported within 24 hours. Proper treatment is required for all  
1429 SAEs, regardless of whether related to the IPs, until the subject has recovered from  
1430 the event or the event has become less urgent or the condition has become stable  
1431 according to the investigator.

1432 To ensure the sponsor's timely and full access to the safety data, the Investigator  
1433 should fill out the *Clinical Trial SAE Report* provided by the sponsor in addition to  
1434 the *SAE Report* provided by CFDA for all SAEs and submit them to the sponsor  
1435 designated CRO company by the by fax or email within 24 hours. Investigator should  
1436 actively cooperate with the sponsor to conduct the SAE survey and provide relevant  
1437 information and medical recordings.

### 1438 **7.3.3. Reporting of Special Events Stipulated by the Protocol**

1439 All the special events stipulated by protocol should be reported to the Sponsor  
1440 regardless of whether they are SAEs or related to the investigational product.

- 1441 • Events conforming to the requirements of SAE should be reported according to  
1442 the SAE expedited reporting procedures (see Section 7.3.2);
- 1443 • For events not conforming to the requirements of SAE, please complete the  
1444 required SAE report and submit it by fax or email to the CRO company  
1445 designated by sponsor within 24 hours.

## 1446 **7.4 Subjects Follow-up**

### 1447 **7.4.1 Follow up of AEs**

1448 The Investigator should follow-up all AEs until occurrence of any of the following  
1449 conditions:

- 1450 • AE is relieved or improved to baseline level.
- 1451 • No further anticipated improvement will present according to the investigator.
- 1452 • Death of the subject.

- 1453 • Lost contact with the subject.  
1454 • The AE is unrelated to study treatment according to the investigator.  
1455 • Subject initiates new anticancer treatment  
1456 • No clinical or safety data will be collected any more, or database are finally  
1457 closed.

1458 The final outcome (including AE remission or date of death) of each AE is required to  
1459 be recorded in the CRF/eCRF.

#### 1460 **7.4.2 Follow up of SAEs**

1461 The tracking and follow-up of subjects with SAEs by the investigator will not only  
1462 help to protect subjects' safety (active treatment, tracking the disease condition), but  
1463 also help to collect information on SAE as much as possible. The investigator should  
1464 keep positive close aware of the disease initiatively, provide necessary treatments, and  
1465 collect complete case information and follow up and report the information timely.

1466 When the causality that SAE is related to investigational product is completely  
1467 excluded, the investigator may no longer collect information on that SAE; when the  
1468 causality cannot be excluded, the investigator should continue tracking and following  
1469 up until the death of the subject, SAE recovery or lost of follow up, and the  
1470 information required in SAE reporting should be completed at the same time.

#### 1471 **7.4.3 Follow-up of Special Events Regulated by the Protocol**

1472 For all special events regulated by protocol, follow-ups should be performed with  
1473 reference to the *Clinical Evaluation of Liver Damage* provided in Appendix 5 in  
1474 addition to regular SAE follow-ups, so as to obtain more effective information for the  
1475 evaluation of this type of events.

### 1476 **7.5 Emergency Unblinding**

1477 The principal investigator of the site should determine whether to perform emergency  
1478 unblinding by combining the actual emergency condition and need of rescue once  
1479 major safety event occur. Unblinding should be performed with IWRS after informing  
1480 of the clinical head from the project leader of the sponsor when necessary. Once  
1481 unblinding is performed, treatment for that subject shall be terminated.

## 1482 **8 Statistical Analysis Plan**

### 1483 **8.1 Primary and Secondary Endpoints**

#### 1484 **8.1.1 Efficacy Endpoint**

##### 1485 **Primary Endpoint:**

1486 **Survival:** defined as time from date (days) of randomization to death caused by any  
1487 reason. For any subjects without report of death at the time of analysis, his/her last  
1488 follow up date of known survival will be considered as censored date.

##### 1489 **Secondary Endpoints:**

1490 Secondary efficacy endpoints include PFS, tumor ORR, DCR, DOR and duration of  
1491 SD.

1492 **Progression-free Survival:** refers to the time interval between the randomized date  
1493 and the initial record of PD or date of death whichever comes first. The presence of  
1494 PD shall be determined in accordance with the result of evaluation performed by the  
1495 investigator with RECIST v1.1. For patients who do not present PD or death, the  
1496 censored date will be the date of final tumor evaluation. For patients who did not  
1497 perform tumor evaluation at post-baseline stage, the censored date will be the next  
1498 day after the randomization date (randomization date+1 day). The imaging results  
1499 demonstrating PD should be obtained as far as possible.

1500 **Tumor ORR:** defined as the occurrence rate of confirmed Complete Response (CR)  
1501 or Partial Response (PR). The target lesions and non-target lesions are evaluated with  
1502 confirmed radiological method and determined by RECIST v1.1. Subjects who have  
1503 not performed tumor evaluation at post-baseline stage shall be regarded as patients  
1504 without response. Subjects who are qualified for evaluation of CR or PR should have  
1505 at least one available lesion for measurement with RECIST v1.1.

1506 **DCR:** defined as the occurrence rate of confirmed CR, PR and SD. The target lesions  
1507 and non-target lesions are evaluated with confirmed radiological method and  
1508 determined by RECIST v1.1.

1509 **Duration of PR:** defined as the time (days) from the first time that the objective  
1510 response reaches PR or CR, whichever comes first, until the occurrence of PD or  
1511 death (if the death of the subject occurs before recording the PD). The duration of  
1512 response is just applied to effective patient who presents CR or PR. The calculation is  
1513 performed based on the actual completion date of tumor scan. The date of last tumor

1514 evaluation will be considered as truncation for patients without PD or death at the  
1515 time of analysis.

1516 Duration of stable disease: (only for evaluation of subjects whose BRS have not  
1517 reached CR or PR): defined as time (days) from date of randomization to the time of  
1518 first record of PD or death (if death of the subject occurs before recording of PD). The  
1519 calculation is performed based on the actual completion date of the tumor scan. The  
1520 date of last tumor evaluation will be considered as truncation for patients without PD  
1521 or death at the time of analysis.

### 1522 **8.1.2 Safety Endpoints:**

1523 Safety endpoints shall include AE, laboratory tests, vital signs and weight, ECG, UCG  
1524 (especially left ventricular ejection fraction [LVEF]) and ECOG PS. All the subjects  
1525 who have received treatment for at least once shall be included in the safety  
1526 assessment.

1527 All the adverse events, whether related to the drug or not, will be recorded in the CRF  
1528 including the start/end date, measures taken, treatment effected (yes vs. no) and the  
1529 outcome. For all the events, the causality with the treatment and the severity will be  
1530 determined by the investigator.

## 1531 **8.2 Statistics and Analysis Method**

### 1532 **8.2.1. Statistical Model**

#### 1533 **Primary efficacy endpoint: OS**

1534 Stratified log-rank test will be used for the comparison of OS of the Fruquintinib with  
1535 placebo group at a two-sided significance level of 0.05. The same factors used for  
1536 randomization will be used for stratification: prior use of VEGF inhibitor (yes vs. no),  
1537 K-Ras gene state (wild type vs. mutant type).

1538 Unstratified log-rank test result will be provided as well. For the median survival time  
1539 (MST) in each treatment group, Kaplan-Meier estimates will be presented with curves  
1540 to provide visually intuitive description of the difference between treatment groups.  
1541 The estimation of treatment effects will be presented by the Hazard Ratio (HR)  
1542 estimated by stratified COX model in a 95% Confidential Interval (CI). OS analysis  
1543 will be performed for the ITT population.

1544 Secondary endpoints: PFS, ORR, DCR, duration of response or stable disease (DOR)

1545 For the median PFS in each treatment group, Kaplan-Meier estimation will be

1546 presented with curves to provide visually intuitive description of the difference  
1547 between the 2 treatment groups. The estimation of treatment effects will be presented  
1548 by Hazard Ratio (HR) estimated by stratified COX model in a 95% Confidential  
1549 Interval (CI). The analysis of PFS will be based on ITT set.

1550 DCR and ORR analysis will be performed based on the subjects of ITT population  
1551 with measurable lesions of baseline disease. The estimated value of DCR and ORR in  
1552 each treatment group and their 95% CI are calculated separately. Comparison of CR  
1553 between treatment groups is performed using stratified Mantel-Haensze test. The CI  
1554 of CR difference between treatment groups shall be calculated using the approximate  
1555 normal distribution method of binomial distribution.

1556 Duration of response (DOR) only applies for patients who have responded to the  
1557 treatment. Statistical test will not be conducted as patients with response are not  
1558 randomized. Descriptive analysis will be adopted for DOR. For each treatment group,  
1559 results will be presented by Kaplan-Meier estimates and distribution curve. Similar  
1560 analysis method will also be used for duration of SD.

## 1561 **8.2.2. Types of Analysis**

### 1562 **8.2.1.1 Efficacy Analysis**

1563 Intention to Treat (ITT) Set: The ITT population, including all randomized patients,  
1564 will be analyzed by randomized treatment group according to the principle of  
1565 intention-to-treat.

1566 Safety Analysis Set (SAS): All randomized patients that received at least one time of  
1567 IP treatment should be included in the SAS.

### 1568 **8.2.1.2 Safety Data Analysis**

1569 Safety population includes patients who have received at least one time of study  
1570 treatment after signing the ICF. All safety parameters shall be summarized and listed  
1571 by using the safety population.

1572 Frequency table (overall and intensity classification) shall be listed in accordance with  
1573 classification of human body systems for treatment emergent adverse events (TEAE)  
1574 data. In the list of overall TEAE occurrence rate, subjects presented the same TEAE  
1575 for more than once shall be calculated once only in the frequency table.

1576 Laboratory data shall summarized by using statement changes and frequency table at  
1577 the same time by each sampling time point. All TEAEs and abnormal laboratory  
1578 variables shall be evaluated by the NCI CTC AE Version 4.0 Classification System.

1579 ECOG PS will be summarized by using Descriptive statistics. Vital signs, ECG and  
1580 UCG shall be listed.

### 1581 **8.3 Statistical Analysis Plan**

1582 See Statistical Analysis Plan (SAP) for details.

1583 OS analysis: OS will be analyzed and then the study will be finally summarized after  
1584 280 OS events are observed after 7 months of follow-up after the enrollment of the  
1585 last patient.

### 1586 **8.4 Sample Size**

1587 The number of primary endpoint (events) required for efficacy assessment is  
1588 calculated based on the following assumptions:

- 1589 • A two-sided significance level of 0.05;
- 1590 • An 80% test power will be ensured when the true HR of treatment  
1591 group/control group is 0.7, in other words, the median OS time is extended  
1592 from 6.3 months to 9 months;
- 1593 • An enrollment rate of 30 subjects per month, which should be achieved  
1594 within 3 months after trial initiation;

1595 Under the premise of these assumptions, approximately 400 subjects will be enrolled  
1596 in nearly 15 months in this study. OS will be analyzed and then the study will be  
1597 finally summarized when 280 OS events are observed in 7 months after the end of  
1598 enrollment.

1599 Meanwhile the sample size will be adjusted according to the result of Phase II  
1600 intestinal cancer clinical trial of Fruquintinib (POC) and the overall survival data of  
1601 the latest third-line and above placebo treatments for advance intestinal cancer at that  
1602 time.

1603

## 1604 **9 Data Quality Assurance**

1605 Electronic data management system will be used in this study.

1606 Access permission: Data administrators shall create account respectively for different  
1607 identities including the investigator, sponsor, monitor and auditor, etc. and grant  
1608 different access permission, e.g. the investigator of each site can access only the  
1609 content of their own site and is granted with the right of data modification. The  
1610 sponsor is limited to browse the data of all cases only; and monitors and auditors can  
1611 review the case conditions of all sites with permission of inserting comments and  
1612 raising queries but has no right of data modification.

1613 Data entry: The clinical investigator or data entry personnel (clinical coordinator)  
1614 designated by the investigator shall input the data in study medical record to eCRF  
1615 timely and accurately. eCRF shall not be used as original record and the content is  
1616 originally from “study medical record”.

1617 Data queries and answers: the monitor can propose queries online when problems are  
1618 found during the monitoring. And investigators shall answer the queries online and  
1619 correct data errors. The monitors are allowed to propose repetitive queries under  
1620 necessary conditions.

1621 Data locking and output: The data administrator shall perform data locking after  
1622 accuracy confirmation of monitors when each subject has completed the study, until  
1623 the completion of data locking for the last subject. When all data is locked, it shall be  
1624 imported to designated database by data administrator and submitted to statistical staff  
1625 for statistical analysis.

1626 When the study is completed, eCRF and all queries shall be archived in burned discs  
1627 as necessary. The data management center shall reserve the electronic data till 5 years  
1628 after the marketing of the drug and during which, the data management center can  
1629 unlock the system at any time after appointment of CFDA for inspection.

## 1630 **10 Data Monitoring Committee (DMC)**

1631 A Data Monitoring Committee (DMC) shall be established in this study. The subjects’  
1632 safety will be determined by the evaluation of risk/benefit at regular data review  
1633 meeting. At the same time, DMC will formally recommend whether to continue or  
1634 terminate the study.

1635 The committee will consist of at least 3 independent oncologists and 1 independent  
1636 statistician. The data review meetings will be regularly held as specified in the DMC

1637 agreement. The study enrollment will continue during the DMC meetings.  
1638 Upon completion of data review, DMC shall provide suggestions on whether to  
1639 continue the study or not, whether modification of the protocol or study termination is  
1640 required. The final decision shall be made by Hutchison Medi Pharma Ltd.

## 1641 **11 Ethics**

### 1642 **11.1 Local Regulations/Declaration of Helsinki**

1643 The investigator shall guarantee that the study will be conducted in full compliance  
1644 with “Declaration of Helsinki” as well as the local laws and regulations, and make  
1645 every effort to protect the subjects. The study must keep full compliance with the  
1646 principle of “Good Clinical Practice” (since Jan. 1997) in ICH three-way guideline or  
1647 local laws and provide subjects protection to a larger extent.

### 1648 **11.2 Informed Consent**

1649 The responsibility of investigators or the personnel designated by investigators (if  
1650 permitted by local law) is to obtain the written ICF from the subjects participating in  
1651 the study after adequate explanation of study objectives, methods, expected benefits  
1652 and potential risks. For patients that unqualified or unable to provide legal consent,  
1653 written ICF must be obtained from his/her legal guardian. If the patient and his/her  
1654 legal guardian cannot read, a notary public must be on the spot during the whole  
1655 process of informed consent. With verbal consent of study participation from the  
1656 patient and his/her legal guardian, the notary public shall sign the ICF to demonstrate  
1657 the accurate explanation and full understanding of the information in it. Investigators  
1658 and other designated personnel are also required to make the subjects understand that  
1659 they can refuse participating in or withdraw from the study for whatever reason at any  
1660 time. The CRF of this study contains a certain part for recording the patients’  
1661 informed consent and it should be completed appropriately. If new safety information  
1662 induces significant change of risk/benefit evaluation, the ICF shall be updated when  
1663 necessary. All patients (including patients receiving treatment) should be informed  
1664 with the new information and provided with a modified ICF. Their consent of  
1665 continuous participation in the study should be obtained.

### 1666 **11.3 Independent Ethics Committee (IEC)/Institution Review Board**



1667 **(IRB)**

1668 The study protocol, other related materials (such as Address to the Patients or study  
1669 description), advertisements and compensations provided to the patients shall be  
1670 submitted to the Ethics Committee by the investigator. EC approval must be obtained  
1671 before starting the study and recorded in the form of letters to the investigators,  
1672 including dates of EC meeting and approval.

1673 Any modification to the study protocol after receiving the EC approval letter shall be  
1674 submitted to the Ethics Committee by the investigator according to the applicable  
1675 procedures as well as laws and regulations.

## 1676 **12 Protocol Modification**

1677 The study protocol and procedure shall not be changed without consent from both the  
1678 investigator and the sponsor.

1679 If the study protocol requires modification, the modified content or updated version  
1680 (modified version) of the protocol shall be submitted to the Ethics Committee for  
1681 written approval before implementation. Besides, the modified protocol shall be  
1682 submitted to the local drug administration or obtain its approval when required and  
1683 requirements of local departments must be complied.

1684 If modification of site ICF is required due to protocol modification, the sponsor and  
1685 the site Ethics Committee must be informed. The modified ICF must be approved by  
1686 the Ethics Committee in written form before application.

1687 The sponsor shall distribute the protocol amendment and the modified protocol to  
1688 every principal investigator and the principal investigators shall be responsible for  
1689 distributing the documents to the corresponding Ethics Committee and other study  
1690 personnel.

## 1691 **13 Conditions of Study Termination**

1692 Both the sponsor and the investigator can stop the study at any time. If study  
1693 termination is a must, it shall be stopped after review and negotiation of both parties.

1694 When stopping the study, the sponsor and investigators shall spare no effort in  
1695 protecting the interests of the subjects.

## 1696 **14 Study Documents, CRFs and Records Retention**

### 1697 **14.1 Investigators Files/Records Retention**

1698 The investigator should preserve all the study materials for at least 5 years, including  
1699 the materials of confirmation to all the subjects (for effective verification of different  
1700 recording materials, such as CRF/eCRF and original hospital records), original ICF of  
1701 all subjects, CRF/eCRF and detailed drug distribution records, etc. After the  
1702 expiration for study documents retaining at the institution, please contact the sponsor  
1703 for the subsequent retention matters.

1704 All the materials of this clinical study are the property of the sponsor, and any  
1705 provision to any third party in any form or publication of the study data is prohibited  
1706 without prior authorization of the sponsor.

### 1707 **14.2 Original Documents and Background Materials**

1708 The original documents shall be archived at the site since they can demonstrate the  
1709 existence of the patients and verify the completeness of collected data.

1710 The data transferred to the CRF/eCRF from the original documents must be consistent  
1711 with the original documents and explanation is required for any discrepancy. In  
1712 accordance with condition of the study, investigators may require the previous  
1713 medical records, hospital transfer records or the current medical records. All data in  
1714 CRF/eCRF must be obtained from the original documents.

### 1715 **14.3 Direct Access to the Original Data and Documents**

1716 The investigators/sites shall accept study-related monitoring, audits, IRB/IEC review  
1717 and inspections by the regulatory authorization, and allow direct access to all related  
1718 original data/documents. CRF/eCRF and all the original documents including disease  
1719 condition record and copies of laboratory tests and medical tests results shall be  
1720 provided for examinations by the clinical research associates (CRA) and auditors of  
1721 the sponsor as well as the health administrative departments at any time.

## 1722 **15 Study Monitoring**

1723 Before the enrollment of the first subject, CRA designated by the sponsor are required  
1724 to be on the site and:

- 1725       • Ensure the completeness of the facilities and equipment;
- 1726       • Discuss the responsibilities of study team members and CRAs during the
- 1727           study with the investigator (or other members) and sign the related
- 1728           agreements;
- 1729       • Pay regular visits to the site and keep close connection with the investigator
- 1730           during the study
- 1731       • Provide adequate information and support to the investigator
- 1732       • Ensure that the study facilities and equipment are still complete
- 1733       • Ensure that the study team keeps full compliance with the Protocol and
- 1734           records data to CRF/eCRF and drug accountability sheet with accuracy;
- 1735       • Ensure the completeness of original data review (check the consistency of
- 1736           CRF/eCRF data and hospital medical record with other study-related records).
- 1737           The access to the original record of each subject is necessary.

## 1738   **16 Confidentiality of the Study Documents and Patients'**

### 1739   **Records**

1740   The investigator is required to ensure anonymity for patients and prevent patient

1741   identity disclosure to unauthorized parties. On the CRF/eCRF or other documents

1742   submitted to the sponsor, the patients shall be identified only by codes instead of

1743   names.

1744   The investigator should keep a record of patients' enrollment registration with

1745   revealed patient code, name and address. Investigators should keep some certain

1746   documents including patient ICF under restrict preservation and submission of these

1747   documents to Hutchison Medi Pharma Ltd. is prohibited.

## 1748   **17 Data Publication and Business Confidentiality**

### 1749   **Protection**

1750   The study result may be published or released on scientific meetings. Investigators

1751   shall agree to submit all manuscripts or abstracts to Hutchison Medi Pharma Ltd. in

1752   advance before scheduled submission, if applicable. Thus the patent information of

1753   the sponsor can be protected and due to the possibility that the investigator may not

1754   know other study information, the sponsor can also propose suggestions.

1755   In accordance with the standard of publication and ethical specifications, Hutchison

1756 Medi Pharma Ltd. supports generally the publication of data from multi centers but  
1757 not that from a single center. Under such circumstances, a coordinating investigator  
1758 shall be designated after agreement of both parties.  
1759

1760 **18 References**

- 1761 1. National Comprehensive Cancer Network (NCCN) 结直肠癌临床实践指南,  
1762 Version 2012.
- 1763 2. Hurwitz H, Fehrenbacher L, Novotny W, et al: Bevacizumab plus irinotecan,  
1764 fluorouracil, and leucovorin for metastatic colorectal cancer. N Engl J Med  
1765 350:2335-2342, 2004
- 1766 3. Demetri GD, Desai J, Fletcher JA, et al: SU11248, a multi-targeted tyrosine  
1767 kinase inhibitor, can overcome imatinib (IM) resistance caused by diverse  
1768 genomic mechanisms in patients (pts) with metastatic gastrointestinal stromal  
1769 tumor (GIST). J Clin Oncol 22:3001, 2004
- 1770 4. Axel Grothey, Alberto F. Sobrero, Salvatore Siena, et al: Results of a phase III  
1771 randomized, double-blind, placebo-controlled, multicenter trial (CORRECT) of  
1772 regorafenib plus best supportive care (BSC) versus placebo plus BSC in patients  
1773 (pts) with metastatic colorectal cancer (mCRC) who have progressed after  
1774 standard therapies. J Clin Oncol 30, 2012 (suppl 4; abstr LBA385)
- 1775 5. 郝希山。2011 年第十三届中国科协年会分会“癌症流行趋势和防控的策略研  
1776 讨会”
- 1777 6. 呋喹替尼研究者手册 V5.0, 版本日期 2014 年 8 月 25 日, 数据截止日期 2014  
1778 年 7 月 31 日。  
1779

1780 **Appendix 1 ECOG Performance Status**

1781 Eastern Cooperative Oncology Group Performance Status Assessments

1782 ECOG PERFORMANCE STATUS\*

---

| Grade | ECOG                                                                                                                                                      |
|-------|-----------------------------------------------------------------------------------------------------------------------------------------------------------|
| 0     | Fully active, able to carry on all pre-disease performance without restriction                                                                            |
| 1     | Restricted in physically strenuous activity but ambulatory and able to carry out work of a light or sedentary nature, e.g., light house work, office work |
| 2     | Ambulatory and capable of all self-care but unable to carry out any work activities, up and about more than 50% of waking hours                           |
| 3     | Capable of only limited self-care, confined to bed or chair more than 50% of waking hours                                                                 |
| 4     | Completed disabled; cannot carry on any self-care; totally confined to bed or chair                                                                       |
| 5     | Dead                                                                                                                                                      |

---

1783

## 1784 **Appendix 2 Response Evaluation Criteria in Solid Tumors**

### 1785 **RECIST Version 1.1**

1786 (Response Evaluation Criteria in Solid Tumors RECIST Version 1.1)

1787 Since no formal Chinese version of RICIST can be found at present, the in-house  
1788 translated version is adopted. For more detailed information, please see the English  
1789 Version (European Journal of Cancer 45 (2009) 228-247).

#### 1790 **ABSTRACT**

##### 1791 **Background**

1792 Assessment of the change in tumor burden is an important feature of the clinical  
1793 evaluation of cancer therapeutics: both tumor shrinkage (objective response) and  
1794 disease progression are useful endpoints in clinical trials. Since RECIST was  
1795 published in 2000, many investigators, cooperative groups, industry and government  
1796 authorities have adopted these criteria in the assessment of treatment outcomes.  
1797 However, a number of questions and issues have arisen which have led to the  
1798 development of a revised RECIST guideline (version 1.1). Evidence for changes,  
1799 summarized in separate papers in this special issue, has come from assessment of a  
1800 large data warehouse (>6500 patients), simulation studies and literature reviews.

1801 Highlights of revised RECIST 1.1:

1802 Major changes include:

1803 Number of lesions to be assessed: based on evidence from numerous trial databases  
1804 merged into a data warehouse for analysis purposes, the number of lesions required to  
1805 assess tumor burden for response determination has been reduced from a maximum of  
1806 10 to a maximum of five total (and from five to two per organ, maximum).

1807 Assessment of pathological lymph nodes is now incorporated: nodes with a short axis  
1808 of  $\geq 15$ mm are considered measurable and assessable as target lesions. The short axis  
1809 measurement should be included in the sum of lesions in calculation of tumor  
1810 response. Nodes that shrink to <10 mm short axis are considered normal.

1811 Confirmation of response is required for trials with response primary endpoint but is  
1812 no longer required in randomized studies since the control arm serves as appropriate  
1813 means of interpretation of data. Disease progression is clarified in several aspects: in  
1814 addition to the previous definition of progression in target disease of 20% increase in  
1815 sum, a 5 mm absolute increase is now required as well to guard against over calling  
1816 PD when the total sum is very small. Furthermore, there is guidance offered on what

1817 constitutes ‘unequivocal progression’ of non-measurable/non-target disease, a source  
1818 of confusion in the original RECIST guideline. Finally, a section on detection of new  
1819 lesions, including the interpretation of FDG-PET scan assessment is included.  
1820 Imaging guidance: the revised RECIST includes a new imaging appendix with  
1821 updated recommendations on the optimal anatomical assessment of lesions.

1822 Future work:

1823 A key question considered by the RECIST Working Group in developing RECIST 1.1  
1824 was whether it was appropriate to move from anatomic unidimensional assessment of  
1825 tumor burden to either volumetric anatomical assessment or to functional assessment  
1826 with PET or MRI. It was concluded that, at present, there is not sufficient  
1827 standardization or evidence to abandon anatomical assessment of tumor burden. The  
1828 only exception to this is in the use of FDG-PET imaging as an adjunct to  
1829 determination of progression. As is detailed in the final paper in this special issue, the  
1830 use of these promising newer approaches requires appropriate clinical validation  
1831 studies.

1832 Keywords: Response criteria, Solid tumors, Guidelines

## 1833 **1. Background**

### 1834 **1.1. History of RECIST Criteria**

1835 Assessment of the change in tumor burden is an important feature of the clinical  
1836 evaluation of cancer therapeutics. Both tumor shrinkage (objective response) and time  
1837 to the development of disease progression are important endpoints in cancer clinical  
1838 trials. The use of tumor regression as the endpoint for phase II trials screening new  
1839 agents for evidence of anti-tumor effect is supported by years of evidence suggesting  
1840 that, for many solid tumors, agents which produce tumor shrinkage in a proportion of  
1841 patients have a reasonable (albeit imperfect) chance of subsequently demonstrating an  
1842 improvement in overall survival or other time to event measures in randomized phase  
1843 III studies. At the current time objective response carries with it a body of evidence  
1844 greater than for any other biomarker supporting its utility as a measure of promising  
1845 treatment effect in phase II screening trials. Furthermore, at both the phase II and  
1846 phase III stage of drug development, clinical trials in advanced disease settings are  
1847 increasingly utilizing time to progression (or progression-free survival) as an endpoint  
1848 upon which efficacy conclusions are drawn, which is also based on anatomical  
1849 measurement of tumor size.

1850 However, both of these tumor endpoints, objective response and time to disease  
1851 progression, are useful only if based on widely accepted and readily applied standard



1852 criteria based on anatomical tumor burden. In 1981 the World Health Organization  
1853 (WHO) first published tumor response criteria, mainly for use in trials where tumor  
1854 response was the primary endpoint. The WHO criteria introduced the concept of an  
1855 overall assessment of tumor burden by summing the products of bidimensional lesion  
1856 measurements and determined response to therapy by evaluation of change from  
1857 baseline while on treatment. However, in the decades that followed their publication,  
1858 cooperative groups and pharmaceutical companies that used the WHO criteria often  
1859 ‘modified’ them to accommodate new technologies or to address areas that were  
1860 unclear in the original document. This led to confusion in interpretation of trial results  
1861 and in fact, the application of varying response criteria was shown to lead to very  
1862 different conclusions about the efficacy of the same regimen. In response to these  
1863 problems, an International Working Party was formed in the mid 1990s to standardize  
1864 and simplify response criteria.

1865 New criteria, known as RECIST (Response Evaluation Criteria in Solid Tumors),  
1866 were published in 2000. Key features of the original RECIST include definitions of  
1867 minimum size of measurable lesions, instructions on how many lesions to follow (up  
1868 to 10; a maximum five per organ site), and the use of unidimensional, rather than  
1869 bidimensional, measures for overall evaluation of tumor burden. These criteria have  
1870 subsequently been widely adopted by academic institutions, cooperative groups, and  
1871 industry for trials where the primary endpoints are objective response or progression.  
1872 In addition, regulatory authorities accept RECIST as an appropriate guideline for  
1873 these assessments.

## 1874 **2. Purpose of this Guideline**

1875 This guideline describes a standard approach to solid tumor measurement and  
1876 definitions for objective assessment of change in tumor size for use in adult and  
1877 paediatric cancer clinical trials. It is expected these criteria will be useful in all trials  
1878 where objective response is the primary study endpoint, as well as in trials where  
1879 assessment of stable disease, tumor progression or time to progression analyses are  
1880 undertaken, since all of these outcome measures are based on an assessment of  
1881 anatomical tumor burden and its change on study. There are no assumptions in this  
1882 paper about the proportion of patients meeting the criteria for any of these endpoints  
1883 which will signal that an agent or treatment regimen is active: those definitions are  
1884 dependent on type of cancer in which a trial is being undertaken and the specific  
1885 agent(s) under study. Protocols must include appropriate statistical sections which  
1886 define the efficacy parameters upon which the trial sample size and decision criteria

1887 are based. In addition to providing definitions and criteria for assessment of tumor  
1888 response, this guideline also makes recommendations regarding standard reporting of  
1889 the results of trials that utilize tumor response as an endpoint.

1890 While these guidelines may be applied in malignant brain tumor studies, there are also  
1891 separate criteria published for response assessment in that setting. This guideline is  
1892 not intended for use for studies of malignant lymphoma since international guidelines  
1893 for response assessment in lymphoma are published separately.

1894 Finally, many oncologists in their daily clinical practice follow their patients'  
1895 malignant disease by means of repeated imaging studies and make decisions about  
1896 continued therapy on the basis of both objective and symptomatic criteria. It is not  
1897 intended that these RECIST guidelines play a role in that decision making, except if  
1898 determined appropriate by the treating oncologist.

### 1899 **3. Measurability of Tumor at Baseline**

#### 1900 **3.1. Definitions**

1901 At baseline, tumor lesions/lymph nodes will be categorized measurable or  
1902 non-measurable as follows:

##### 1903 **3.1.1. Measurable**

1904 **Tumor lesions:** Must be accurately measured in at least one dimension (longest  
1905 diameter in the plane of measurement is to be recorded) with a minimum size of:

- 1906 • 10mm by CT scan (CT scan slice thickness no greater than 5 mm).
- 1907 • 10mm caliper measurement by clinical exam (lesions which cannot be accurately  
1908 measured with calipers should be recorded as non-measurable).
- 1909 • 20mm by chest X-ray.

1910 **Malignant lymph nodes:** To be considered pathologically enlarged and measurable,  
1911 a lymph node must be  $\geq 15$ mm in short axis when assessed by CT scan (CT scan  
1912 slice thickness recommended to be no greater than 5 mm). At baseline and in  
1913 follow-up, only the short axis will be measured and followed. See also notes below on  
1914 'Baseline documentation of target and non-target lesions' for information on lymph  
1915 node measurement.

##### 1916 **3.1.2. Non-measurable**

1917 All other lesions, including small lesions (longest diameter  $< 10$ mm or pathological  
1918 lymph nodes with  $\geq 10$  to  $< 15$ mm short axis) as well as truly non-measurable lesions.  
1919 Lesions considered truly non-measurable include: leptomeningeal disease, ascites,  
1920 pleural or pericardial effusion, inflammatory breast disease, lymphangitic  
1921 involvement of skin or lung, abdominal masses/abdominal organomegaly identified

1922 by physical exam that is not measurable by reproducible imaging techniques.

### 1923 **3.1.3. Special Considerations Regarding Lesion Measurability**

1924 Bone lesions, cystic lesions, and lesions previously treated with local therapy require  
1925 particular comment:

1926 Bone lesions:

- 1927 • Bone scan, PET scan or plain films are not considered adequate imaging  
1928 techniques to measure bone lesions. However, these techniques can be used to  
1929 confirm the presence or disappearance of bone lesions.
- 1930 • Lytic bone lesions or mixed lytic-blastic lesions, with identifiable soft tissue  
1931 components, that can be evaluated by cross sectional imaging techniques such as  
1932 CT or MRI can be considered as measurable lesions if the soft tissue component  
1933 meets the definition of measurability described above.
- 1934 • Blastic bone lesions are non-measurable.

1935 Cystic lesions:

- 1936 • Lesions that meet the criteria for radiographically defined simple cysts should not  
1937 be considered as malignant lesions (neither measurable nor non-measurable)  
1938 since they are, by definition, simple cysts.
- 1939 • ‘Cystic lesions’ thought to represent cystic metastases can be considered as  
1940 measurable lesions, if they meet the definition of measurability described above.  
1941 However, if no cystic lesions are present in the same patient, these are preferred  
1942 for selection as target lesions.

1943 Lesions with prior local treatment:

- 1944 • Tumor lesions situated in a previously irradiated area, or in an area subjected to  
1945 other loco-regional therapy, are usually not considered measurable unless there  
1946 has been demonstrated progression in the lesion. Study protocols should detail the  
1947 conditions under which such lesions would be considered measurable.

## 1948 **3.2. Specifications by Methods of Measurements**

### 1949 **3.2.1. Measurement of Lesions**

1950 All measurements should be recorded in metric notation, using calipers if clinically  
1951 assessed. All baseline evaluations should be performed as close as possible to the  
1952 treatment start and never more than 4 weeks before the beginning of the treatment.

### 1953 **3.2.2. Method of Assessment**

1954 The same method of assessment and the same technique should be used to  
1955 characterize each identified and reported lesion at baseline and during follow-up.

1956 Imaging based evaluation should always be done rather than clinical examination

1957 unless the lesion(s) being followed cannot be imaged but are assessable by clinical  
1958 exam.

1959 Clinical lesions: Clinical lesions will only be considered measurable when they are  
1960 superficial and P10mm diameter as assessed using calipers (e.g. skin nodules). For the  
1961 case of skin lesions, documentation by color photography including a ruler to estimate  
1962 the size of the lesion is suggested. As noted above, when lesions can be evaluated by  
1963 both clinical exam and imaging, imaging evaluation should be undertaken since it is  
1964 more objective and may also be reviewed at the end of the study.

1965 Chest X-ray: Chest CT is preferred over chest X-ray, particularly when progression is  
1966 an important endpoint, since CT is more sensitive than X-ray, particularly in  
1967 identifying new lesions. However, lesions on chest X-ray may be considered  
1968 measurable if they are clearly defined and surrounded by aerated lung.

1969 CT, MRI: CT is the best currently available and reproducible method to measure  
1970 lesions selected for response assessment. This guideline has defined measurability of  
1971 lesions on CT scan based on the assumption that CT slice thickness is 5mm or less.  
1972 As is described in Appendix II, when CT scans have slice thickness greater than 5 mm,  
1973 the minimum size for a measurable lesion should be twice the slice thickness. MRI is  
1974 also acceptable in certain situations (e.g. for body scans). More details concerning the  
1975 use of both CT and MRI for assessment of objective tumor response evaluation are  
1976 provided in Appendix II.

1977 Ultrasound: Ultrasound is not useful in assessment of lesion size and should not be  
1978 used as a method of measurement.

1979 Ultrasound examinations cannot be reproduced in their entirety for independent  
1980 review at a later date and, because they are operator dependent, it cannot be  
1981 guaranteed that the same technique and measurements will be taken from one  
1982 assessment to the next (described in greater detail in Appendix II). If new lesions are  
1983 identified by ultrasound in the course of the study, confirmation by CT or MRI is  
1984 advised. If there is concern about radiation exposure at CT, MRI may be used instead  
1985 of CT in selected instances.

1986 Endoscopy, laparoscopy: The utilization of these techniques for objective tumor  
1987 evaluation is not advised. However, they can be useful to confirm complete  
1988 pathological response when biopsies are obtained or to determine relapse in trials  
1989 where recurrence following complete response or surgical resection is an endpoint.

1990 Tumor markers: Tumor markers alone cannot be used to assess objective tumor  
1991 response. If markers are initially above the upper normal limit, however, they must

1992 normalize for a patient to be considered in complete response. Because tumor markers  
1993 are disease specific, instructions for their measurement should be incorporated into  
1994 protocols on a disease specific basis. Specific guidelines for both CA-125 response (in  
1995 recurrent ovarian cancer) and PSA response (in recurrent prostate cancer), have been  
1996 published. In addition, the Gynecologic Cancer Intergroup has developed CA125  
1997 progression criteria which are to be integrated with objective tumor evaluation for use  
1998 in first-line trials in ovarian cancer.

1999 Cytology, histology: These techniques can be used to differentiate between PR and  
2000 CR in rare cases if required by protocol (for example, residual lesions in tumor types  
2001 such as germ cell tumors, where known residual benign tumors can remain). When  
2002 effusions are known to be a potential adverse effect of treatment (e.g. with certain  
2003 taxane compounds or angiogenesis inhibitors), the cytological confirmation of the  
2004 neoplastic origin of any effusion that appears or worsens during treatment can be  
2005 considered if the measurable tumor has met criteria for response or stable disease in  
2006 order to differentiate between response (or stable disease) and progressive disease.

#### 2007 **4. Tumor Response Evaluation**

##### 2008 **4.1. Assessment of Overall Tumor Burden and Measurable Disease**

2009 To assess objective response or future progression, it is necessary to estimate the  
2010 overall tumor burden at baseline and use this as a comparator for subsequent  
2011 measurements. Only patients with measurable disease at baseline should be included  
2012 in protocols where objective tumor response is the primary endpoint. Measurable  
2013 disease is defined by the presence of at least one measurable lesion. In studies where  
2014 the primary endpoint is tumor progression (either time to progression or proportion  
2015 with progression at a fixed date), the protocol must specify if entry is restricted to  
2016 those with measurable disease or whether patients having non-measurable disease  
2017 only are also eligible.

##### 2018 **4.2. Baseline Documentation of ‘Target’ and ‘Non-target’ Lesions**

2019 When more than one measurable lesion is present at baseline all lesions up to a  
2020 maximum of five lesions total (and a maximum of two lesions per organ)  
2021 representative of all involved organs should be identified as target lesions and will be  
2022 recorded and measured at baseline (this means in instances where patients have only  
2023 one or two organ sites involved a maximum of two and four lesions respectively will  
2024 be recorded).

2025 Target lesions should be selected on the basis of their size (lesions with the longest  
2026 diameter), be representative of all involved organs, but in addition should be those

2027 that lend themselves to reproducible repeated measurements. It may be the case that,  
2028 on occasion, the largest lesion does not lend itself to reproducible measurement in  
2029 which circumstance the next largest lesion which can be measured reproducibly  
2030 should be selected.

2031 Lymph nodes merit special mention since they are normal anatomical structures  
2032 which may be visible by imaging even if not involved by tumor. Pathological nodes  
2033 which are defined as measurable and may be identified as target lesions must meet the  
2034 criterion of a short axis of  $\geq 15$ mm by CT scan. Only the short axis of these nodes  
2035 will contribute to the baseline sum. The short axis of the node is the diameter  
2036 normally used by radiologists to judge if a node is involved by solid tumor. Nodal size  
2037 is normally reported as two dimensions in the plane in which the image is obtained  
2038 (for CT scan this is almost always the axial plane; for MRI the plane of acquisition  
2039 may be axial, saggital or coronal). The smaller of these measures is the short axis. For  
2040 example, an abdominal node which is reported as being 20mm  $\times$  30mm has a short  
2041 axis of 20mm and qualifies as a malignant, measurable node. In this example, 20mm  
2042 should be recorded as the node measurement. All other pathological nodes (those with  
2043 short axis  $\geq 10$ mm but  $< 15$  mm) should be considered non-target lesions. Nodes that  
2044 have a short axis  $< 10$ mm are considered non-pathological and should not be recorded  
2045 or followed.

2046 A sum of the diameters (longest for non-nodal lesions, short axis for nodal lesions) for  
2047 all target lesions will be calculated and reported as the baseline sum diameters. If  
2048 lymph nodes are to be included in the sum, then as noted above, only the short axis is  
2049 added into the sum. The baseline sum diameters will be used as reference to further  
2050 characterize any objective tumor regression in the measurable dimension of the  
2051 disease.

2052 All other lesions (or sites of disease) including pathological lymph nodes should be  
2053 identified as non-target lesions and should also be recorded at baseline. Measurements  
2054 are not required and these lesions should be followed as 'present', 'absent', or in rare  
2055 cases 'unequivocal progression'. In addition, it is possible to record multiple  
2056 non-target lesions involving the same organ as a single item on the case record form  
2057 (e.g. 'multiple enlarged pelvic lymph nodes' or 'multiple liver metastases').

### 2058 **4.3. Response Criteria**

2059 This section provides the definitions of the criteria used to determine objective tumor  
2060 response for target lesions.

#### 2061 **4.3.1. Evaluation of Target Lesions**

2062 Complete Response (CR): Disappearance of all target lesions.

2063 Any pathological lymph nodes (whether target or non-target) must have reduction in  
2064 short axis to <10 mm.

2065 Partial Response (PR): At least a 30% decrease in the sum of diameters of target  
2066 lesions, taking as reference the baseline sum diameters

2067 Progressive Disease (PD): At least a 20% increase in the sum of diameters of target  
2068 lesions, taking as reference the smallest sum on study (this includes the baseline sum  
2069 if that is the smallest on study). In addition to the relative increase of 20%, the sum  
2070 must also demonstrate an absolute increase of at least 5 mm. (Note: the appearance of  
2071 one or more new lesions is also considered progression).

2072 Stable Disease (SD): Neither sufficient shrinkage to qualify for PR nor sufficient  
2073 increase to qualify for PD, taking as reference the smallest sum diameters while on  
2074 study.

#### 2075 **4.3.2. Special Notes on the Assessment of Target Lesions**

##### 2076 **Lymph nodes:**

2077 Lymph nodes identified as target lesions should always have the actual short axis  
2078 measurement recorded (measured in the same anatomical plane as the baseline  
2079 examination), even if the nodes regress to below 10mm on study. This means that  
2080 when lymph nodes are included as target lesions, the ‘sum’ of lesions may not be zero  
2081 even if complete response criteria are met, since a normal lymph node is defined as  
2082 having a short axis of <10mm. Case report forms or other data collection methods  
2083 may therefore be designed to have target nodal lesions recorded in a separate section  
2084 where, in order to qualify for CR, each node must achieve a short axis <10mm. For  
2085 PR, SD and PD, the actual short axis measurement of the nodes is to be included in  
2086 the sum of target lesions.

##### 2087 **Target Lesions that Become ‘too Small to Measure’:**

2088 While on study, all lesions (nodal and non-nodal) recorded at baseline should have  
2089 their actual measurements recorded at each subsequent evaluation, even when very  
2090 small (e.g. 2mm).

2091 However, sometimes lesions or lymph nodes which are recorded as target lesions at  
2092 baseline become so faint on CT scan that the radiologist may not feel comfortable  
2093 assigning an exact measure and may report them as being ‘too small to measure’.

2094 When this occurs it is important that a value be recorded on the case report form. If it  
2095 is the opinion of the radiologist that the lesion has likely disappeared, the  
2096 measurement should be recorded as 0mm. If the lesion is believed to be present and is

2097 faintly seen but too small to measure, a default value of 5mm should be assigned  
2098 (Note: It is less likely that this rule will be used for lymph nodes since they usually  
2099 have a definable size when normal and are frequently surrounded by fat such as in the  
2100 retroperitoneum; however, if a lymph node is believed to be present and is faintly seen  
2101 but too small to measure, a default value of 5mm should be assigned in this  
2102 circumstance as well).

2103 This default value is derived from the 5mm CT slice thickness (but should not be  
2104 changed with varying CT slice thickness). The measurement of these lesions is  
2105 potentially non-reproducible, therefore providing this default value will prevent false  
2106 responses or progressions based upon measurement error. To reiterate, however, if the  
2107 radiologist is able to provide an actual measure, that should be recorded, even if it is  
2108 below 5mm.

#### 2109 **Lesions that Split or Coalesce on Treatment:**

2110 As noted in Appendix II, when non-nodal lesions ‘fragment’, the longest diameters of  
2111 the fragmented portions should be added together to calculate the target lesion sum.  
2112 Similarly, as lesions coalesce, a plane between them may be maintained that would  
2113 aid in obtaining maximal diameter measurements of each individual lesion. If the  
2114 lesions have truly coalesced such that they are no longer separable, the vector of the  
2115 longest diameter in this instance should be the maximal longest diameter for the  
2116 ‘coalesced lesion’.

#### 2117 **4.3.3. Evaluation of Non-target Lesions**

2118 This section provides the definitions of the criteria used to determine the tumor  
2119 response for the group of non-target lesions. While some non-target lesions may  
2120 actually be measurable, they need not be measured and instead should be assessed  
2121 only qualitatively at the time points specified in the protocol.

2122 Complete Response (CR): Disappearance of all non-target lesions and normalization  
2123 of tumor marker level. All lymph nodes must be non-pathological in size (<10mm  
2124 short axis).

2125 Non-CR/Non-PD: Persistence of one or more non-target lesion(s) and/or maintenance  
2126 of tumor marker level above the normal limits.

2127 Progressive Disease (PD): Unequivocal progression (see comments below) of existing  
2128 non-target lesions. (Note: the appearance of one or more new lesions is also  
2129 considered progression).

#### 2130 **4.3.4. Special Notes on Assessment of Progression of Non-target Disease**

2131 The concept of progression of non-target disease requires additional explanation as



2132 follows:

2133 When the patient also has measurable disease, in this setting, to achieve  
2134 ‘unequivocal progression’ on the basis of the non-target disease, there must be an  
2135 overall level of substantial worsening in non-target disease such that, even in presence  
2136 of SD or PR in target disease, the overall tumor burden has increased sufficiently to  
2137 merit discontinuation of therapy. A modest ‘increase’ in the size of one or more  
2138 non-target lesions is usually not sufficient to qualify for unequivocal progression  
2139 status. The designation of overall progression solely on the basis of change in  
2140 non-target disease in the face of SD or PR of target disease will therefore be  
2141 extremely rare.

2142 When the patient has only non-measurable disease, this circumstance arises in some  
2143 phase III trials when it is not a criterion of study entry to have measurable disease.  
2144 The same general concepts apply here as noted above, however, in this instance there  
2145 is no measurable disease assessment to factor into the interpretation of an increase in  
2146 non-measurable disease burden. Because worsening in non-target disease cannot be  
2147 easily quantified (by definition: if all lesions are truly non-measurable) a useful test  
2148 that can be applied when assessing patients for unequivocal progression is to consider  
2149 if the increase in overall disease burden based on the change in non-measurable  
2150 disease is comparable in magnitude to the increase that would be required to declare  
2151 PD for measurable disease: i.e. an increase in tumor burden representing an additional  
2152 73% increase in ‘volume’ (which is equivalent to a 20% increase diameter in a  
2153 measurable lesion). Examples include an increase in a pleural effusion from ‘trace’ to  
2154 ‘large’, an increase in lymphangitic disease from localized to widespread, or may be  
2155 described in protocols as ‘sufficient to require a change in therapy’. If ‘unequivocal  
2156 progression’ is seen, the patient should be considered to have had overall PD at that  
2157 point. While it would be ideal to have objective criteria to apply to non-measurable  
2158 disease, the very nature of that disease makes it impossible to do so, therefore the  
2159 increase must be substantial.

#### 2160 **4.3.5. New Lesions**

2161 The appearance of new malignant lesions denotes disease progression; therefore,  
2162 some comments on detection of new lesions are important. There are no specific  
2163 criteria for the identification of new radiographic lesions; however, the finding of a  
2164 new lesion should be unequivocal: i.e. not attributable to differences in scanning  
2165 technique, change in imaging modality or findings thought to represent something  
2166 other than tumor (for example, some ‘new’ bone lesions may be simply healing or

2167 flare of pre-existing lesions). This is particularly important when the patient's baseline  
2168 lesions show partial or complete response. For example, necrosis of a liver lesion may  
2169 be reported on a CT scan report as a 'new' cystic lesion, which it is not.

2170 A lesion identified on a follow-up study in an anatomical location that was not  
2171 scanned at baseline is considered a new lesion and will indicate disease progression.  
2172 An example of this is the patient who has visceral disease at baseline and while on  
2173 study has a CT or MRI brain ordered which reveals metastases. The patient's brain  
2174 metastases are considered to be evidence of PD even if he/she did not have brain  
2175 imaging at baseline.

2176 If a new lesion is equivocal, for example because of its small size, continued therapy  
2177 and follow-up evaluation will clarify if it represents truly new disease. If repeat scans  
2178 confirm there is definitely a new lesion, then progression should be declared using the  
2179 date of the initial scan.

2180 While FDG-PET response assessments need additional study, it is sometimes  
2181 reasonable to incorporate the use of FDG-PET scanning to complement CT scanning  
2182 in assessment of progression (particularly possible 'new' disease). New lesions on the  
2183 basis of FDG-PET imaging can be identified according to the following algorithm:

2184 a. Negative FDG-PET at baseline, with a positive FDG-PET at follow-up is a sign of  
2185 PD based on a new lesion.

2186 b. No FDG-PET at baseline and a positive FDG-PET at follow-up:

2187 c. If the positive FDG-PET at follow-up corresponds to a new site of disease  
2188 confirmed by CT, this is PD.

2189 d. If the positive FDG-PET at follow-up is not confirmed as a new site of disease on  
2190 CT, additional follow-up CT scans are needed to determine if there is truly  
2191 progression occurring at that site (if so, the date of PD will be the date of the initial  
2192 abnormal FDG-PET scan).

2193 e. If the positive FDG-PET at follow-up corresponds to a pre-existing site of disease  
2194 on CT that is not progressing on the basis of the anatomic images, this is not PD.

#### 2195 **4.4. Evaluation of Best Overall Response**

2196 The best overall response is the best response recorded from the start of the study  
2197 treatment until the end of treatment taking into account any requirement for  
2198 confirmation. On occasion a response may not be documented until after the end of  
2199 therapy so protocols should be clear if post-treatment assessments are to be  
2200 considered in determination of best overall response. Protocols must specify how any  
2201 new therapy introduced before progression will affect best response designation. The

2202 patient's best overall response assignment will depend on the findings of both target  
2203 and non-target disease and will also take into consideration the appearance of new  
2204 lesions. Furthermore, depending on the nature of the study and the protocol  
2205 requirements, it may also require confirmatory measurement (see Section 4.6).  
2206 Specifically, in non-randomized trials where response is the primary endpoint,  
2207 confirmation of PR or CR is needed to deem either one the 'best overall response'.  
2208 This is described further below.

#### 2209 **4.4.1. Time Point Response**

2210 It is assumed that at each protocol specified time point, a response assessment occurs.  
2211 [Table 1](#) on the next page provides a summary of the overall response status  
2212 calculation at each time point for patients who have measurable disease at baseline.  
2213 When patients have non-measurable (therefore non-target) disease only, [Table 2](#) is to  
2214 be used.

#### 2215 **4.4.2. Missing Assessments and Inevaluable Designation**

2216 When no imaging/measurement is done at all at a particular time point, the patient is  
2217 not evaluable (NE) at that time point.

2218 If only a subset of lesion measurements are made at an assessment, usually the case is  
2219 also considered NE at that time point, unless a convincing argument can be made that  
2220 the contribution of the individual missing lesion(s) would not change the assigned  
2221 time point response. This would be most likely to happen in the case of PD. For  
2222 example, if a patient had a baseline sum of 50mm with three measured lesions and at  
2223 follow-up only two lesions were assessed, but those gave a sum of 80 mm, the patient  
2224 will have achieved PD status, regardless of the contribution of the missing lesion.

#### 2225 **4.4.3. Best Overall Response: All Time Points**

2226 The best overall response is determined once all the data for the patient is known.  
2227 Best response determination in trials where confirmation of complete or partial  
2228 response IS NOT required: Best response in these trials is defined as the best response  
2229 across all time points (for example, a patient who has SD at first assessment, PR at  
2230 second assessment, and PD on last assessment has a best overall response of PR).  
2231 When SD is believed to be best response, it must also meet the protocol specified  
2232 minimum time from baseline. If the minimum time is not met when SD is otherwise  
2233 the best time point response, the patient's best response depends on the subsequent  
2234 assessments. For example, a patient who has SD at first assessment, PD at second and  
2235 does not meet minimum duration for SD, will have a best response of PD. The same  
2236 patient lost to follow-up after the first SD assessment would be considered

2237 inevaluable.

2238 Best response determination in trials where confirmation of complete or partial  
2239 response IS required: Complete or partial responses may be claimed only if the  
2240 criteria for each are met at a subsequent time point as specified in the protocol  
2241 (generally 4 weeks later). In this circumstance, the best overall response can be  
2242 interpreted as in Table 3.

#### 2243 **4.4.4. Special Notes on Response Assessment**

2244 When nodal disease is included in the sum of target lesions and the nodes decrease to  
2245 ‘normal’ size (<10 mm), they may still have a measurement reported on scans. This  
2246 measurement should be recorded even though the nodes are normal in order not to  
2247 overstate progression should it be based on increase in size of the nodes. As noted  
2248 earlier, this means that patients with CR may not have a total sum of ‘zero’ on the  
2249 case report form (CRF).

2250 In trials where confirmation of response is required, repeated ‘NE’ time point  
2251 assessments may complicate best response determination. The analysis plan for the  
2252 trial must address how missing data/assessments will be addressed in determination of  
2253 response and progression. For example, in most trials it is reasonable to consider a  
2254 patient with time point responses of PR-NE-PR as a confirmed response.

2255 Patients with a global deterioration of health status requiring discontinuation of  
2256 treatment without objective evidence of disease progression at that time should be  
2257 reported as ‘symptomatic deterioration’. Every effort should be made to document  
2258 objective progression even after discontinuation of treatment. Symptomatic  
2259 deterioration is not a descriptor of an objective response: it is a reason for stopping  
2260 study therapy. The objective response status of such patients is to be determined by  
2261 evaluation of target and non-target disease as shown in Tables 1–3.

2262 Conditions that define ‘early progression, early death and inevaluability’ are study  
2263 specific and should be clearly described in each protocol (depending on treatment  
2264 duration, treatment periodicity).

2265 In some circumstances it may be difficult to distinguish residual disease from normal  
2266 tissue. When the evaluation of complete response depends upon this determination, it  
2267 is recommended that the residual lesion be investigated (fine needle aspirate/biopsy)  
2268 before assigning a status of complete response. FDG-PET may be used to upgrade a  
2269 response to a CR in a manner similar to a biopsy in cases where a residual  
2270 radiographic abnormality is thought to represent fibrosis or scarring. The use of  
2271 FDG-PET in this circumstance should be prospectively described in the protocol and

2272 supported by disease specific medical literature for the indication. However, it must  
 2273 be acknowledged that both approaches may lead to false positive CR due to  
 2274 limitations of FDG-PET and biopsy resolution/sensitivity.

2275

2276 Table 1 Time Point Response: Patients with Target (+/- Non-target) Disease.

| Target lesions    | Non-target lesions          | New lesions | Overall response |
|-------------------|-----------------------------|-------------|------------------|
| CR                | CR                          | No          | CR               |
| CR                | Non-CR/non-PD               | No          | PR               |
| CR                | Not evaluated               | No          | PR               |
| PR                | Non-PD or not all evaluated | No          | PR               |
| SD                | Non-PD or not all evaluated | No          | SD               |
| Not all evaluated | Non-PD                      | No          | NE               |
| PD                | Any                         | Yes or No   | PD               |
| Any               | PD                          | Yes or No   | PD               |
| Any               | Any                         | Yes         | PD               |

CR = complete response, PR = partial response, SD = stable disease, PD = progressive disease, and NE = inevaluable.

2277

2278 Table 2 – Time Point Response: Patients with Non-target Disease Only.

| Non-target lesions | New lesions | Overall response |
|--------------------|-------------|------------------|
| CR                 | No          | CR               |
| Non-CR/non-PD      | No          | Non-CR/non-PD*   |
| Not all evaluated  | No          | NE               |
| Unequivocal PD     | Yes or No   | PD               |
| Any                | Yes         | PD               |

2279 Note: ‘Non-CR/non-PD’ is preferred over ‘stable disease’ for non-target disease since  
 2280 SD is increasingly used as endpoint for assessment of efficacy in some trials so to  
 2281 assign this category when no lesions can be measured is not advised.

2282 For equivocal findings of progression (e.g. very small and uncertain new lesions;  
 2283 cystic changes or necrosis in existing lesions), treatment may continue until the next  
 2284 scheduled assessment. If at the next scheduled assessment, progression is confirmed,  
 2285 the date of progression should be the earlier date when progression was suspected.

2286

2287 Table 3 Best Overall Response when Confirmation of CR and PR Required.

| Overall response<br>First time point | Overall response<br>Subsequent time point | BEST overall response                                           |
|--------------------------------------|-------------------------------------------|-----------------------------------------------------------------|
| CR                                   | CR                                        | CR                                                              |
| CR                                   | PR                                        | SD, PD or PR <sup>a</sup>                                       |
| CR                                   | SD                                        | SD provided minimum criteria for SD duration met, otherwise, PD |
| CR                                   | PD                                        | SD provided minimum criteria for SD duration met, otherwise, PD |
| CR                                   | NE                                        | SD provided minimum criteria for SD duration met, otherwise NE  |
| PR                                   | CR                                        | PR                                                              |
| PR                                   | PR                                        | PR                                                              |
| PR                                   | SD                                        | SD                                                              |
| PR                                   | PD                                        | SD provided minimum criteria for SD duration met, otherwise, PD |
| PR                                   | NE                                        | SD provided minimum criteria for SD duration met, otherwise NE  |
| NE                                   | NE                                        | NE                                                              |

2288 Note: CR = complete response, PR = partial response, SD = stable disease, PD =  
2289 progressive disease, and NE = inevaluable.

2290 <sup>a</sup>: If a CR is truly met at first time point, then any disease seen at a subsequent time  
2291 point, even disease meeting PR criteria relative to baseline, makes the disease PD at  
2292 that point (since disease must have reappeared after CR). Best response would depend  
2293 on whether minimum duration for SD was met. However, sometimes ‘CR’ may be  
2294 claimed when subsequent scans suggest small lesions were likely still present and in  
2295 fact the patient had PR, not CR at the first time point. Under these circumstances, the  
2296 original CR should be changed to PR and the best response is PR.

#### 2297 4.5. Frequency of Tumor Re-evaluation

2298 Frequency of tumor re-evaluation while on treatment should be protocol specific and  
2299 adapted to the type and schedule of treatment. However, in the context of phase II  
2300 studies where the beneficial effect of therapy is not known, follow-up every 6–8  
2301 weeks (timed to coincide with the end of a cycle) is reasonable. Smaller or greater  
2302 time intervals than these could be justified in specific regimens or circumstances. The

2303 protocol should specify which organ sites are to be evaluated at baseline (usually  
2304 those most likely to be involved with metastatic disease for the tumor type under  
2305 study) and how often evaluations are repeated. Normally, all target and non-target  
2306 sites are evaluated at each assessment. In selected circumstances certain non-target  
2307 organs may be evaluated less frequently. For example, bone scans may need to be  
2308 repeated only when complete response is identified in target disease or when  
2309 progression in bone is suspected.

2310 After the end of the treatment, the need for repetitive tumor evaluations depends on  
2311 whether the trial has as a goal the response rate or the time to an event  
2312 (progression/death). If 'time to an event' (e.g. time to progression, disease-free  
2313 survival, progression-free survival) is the main endpoint of the study, then routine  
2314 scheduled re-evaluation of protocol specified sites of disease is warranted. In  
2315 randomized comparative trials in particular, the scheduled assessments should be  
2316 performed as identified on a calendar schedule (for example: every 6~8 weeks on  
2317 treatment or every 3~4 months after treatment) and should not be affected by delays  
2318 in therapy, drug holidays or any other events that might lead to imbalance in a  
2319 treatment arm in the timing of disease assessment.

#### 2320 **4.6. Confirmatory Measurement/Duration of Response**

##### 2321 **4.6.1. Confirmation**

2322 In non-randomized trials where response is the primary endpoint, confirmation of PR  
2323 and CR is required to ensure responses identified are not the result of measurement  
2324 error. This will also permit appropriate interpretation of results in the context of  
2325 historical data where response has traditionally required confirmation in such trials.  
2326 However, in all other circumstances, i.e. in randomized trials (phase II or III) or  
2327 studies where stable disease or progression are the primary endpoints, confirmation of  
2328 response is not required since it will not add value to the interpretation of trial results.  
2329 However, elimination of the requirement for response confirmation may increase the  
2330 importance of central review to protect against bias, in particular in studies which are  
2331 not blinded.

2332 In the case of SD, measurements must have met the SD criteria at least once after  
2333 study entry at a minimum interval (in general not less than 6~8 weeks) that is defined  
2334 in the study protocol.

##### 2335 **4.6.2. Duration of Overall Response**

2336 The duration of overall response is measured from the time measurement criteria are  
2337 first met for CR/PR (whichever is first recorded) until the first date that recurrent or

2338 progressive disease is objectively documented (taking as reference for progressive  
2339 disease the smallest measurements recorded on study). The duration of overall  
2340 complete response is measured from the time measurement criteria are first met for  
2341 CR until the first date that recurrent disease is objectively documented.

#### 2342 **4.6.3. Duration of Stable Disease**

2343 Stable disease is measured from the start of the treatment (in randomized trials, from  
2344 date of randomization) until the criteria for progression are met, taking as reference  
2345 the smallest sum on study (if the baseline sum is the smallest, this is the reference for  
2346 calculation of PD). The clinical relevance of the duration of stable disease varies in  
2347 different studies and diseases. If the proportion of patients achieving stable disease for  
2348 a minimum period of time is an endpoint of importance in a particular trial, the  
2349 protocol should specify the minimal time interval required between two  
2350 measurements for determination of stable disease.

2351 Note: The duration of response and stable disease as well as the progression-free  
2352 survival are influenced by the frequency of follow-up after baseline evaluation. It is  
2353 not in the scope of this guideline to define a standard follow-up frequency. The  
2354 frequency should take into account many parameters including disease types and  
2355 stages, treatment periodicity and standard practice. However, these limitations of the  
2356 precision of the measured endpoint should be taken into account if comparisons  
2357 between trials are to be made.

### 2358 **4.7. Progression-free Survival/Proportion Progression-free**

#### 2359 **4.7.1. Phase II trials**

2360 This guideline is focused primarily on the use of objective response endpoints for  
2361 phase II trials. In some circumstances, response rate' may not be the optimal method  
2362 to assess the potential anticancer activity of new agents/regimens. In such cases  
2363 'progression-free survival' (PFS) or the 'proportion progression-free' at landmark  
2364 time points, might be considered appropriate alternatives to provide an initial signal of  
2365 biologic effect of new agents. It is clear, however, that in an uncontrolled trial, these  
2366 measures are subject to criticism since an apparently promising observation may be  
2367 related to biological factors such as patient selection and not the impact of the  
2368 intervention. Thus, phase II screening trials utilizing these endpoints are best designed  
2369 with a randomized control. Exceptions may exist where the behaviour patterns of  
2370 certain cancers are so consistent (and usually consistently poor), that a  
2371 non-randomized trial is justifiable. However, in these cases it will be essential to  
2372 document with care the basis for estimating the expected PFS or proportion



2373 progression-free in the absence of a treatment effect.

2374 **For the endpoints evaluation, independent assessment and result reporting**  
2375 **concerning the Phase III trials, please see the English version.**

2376

2377 **Appendix 3 Restricted and Prohibited Drugs and Food**

2378 Restricted drugs and prohibited traditional Chinese medicine and food during the  
2379 study are as follows:

2380 1. Strong inhibitors and strong inducers of CYP3A4

2381 The comparatively more common strong inhibitors of CYP3A4 are listed as follows,  
2382 which include but not limited to:

|              |                  |
|--------------|------------------|
| Ketoconazole | Saquinavir       |
| Itraconazole | Erythromycin     |
| Fluconazole  | Clarithromycin   |
| Voriconazole | Telithromycin    |
| Nefazodone   | Grapefruit       |
| Indinavir    | Grapefruit juice |
| Nelfinavir   |                  |

2383

2384 The comparatively more common strong inducers of CYP3A4 are listed as follows,  
2385 which include but not limited to:

|               |                      |
|---------------|----------------------|
| Rifabutin     | Phenobarbital        |
| Rifampicin    | Phenytoin            |
| Rifapentine   | Hypericum perforatum |
| Carbamazepine |                      |

2386

2387 2. Traditional Chinese medicine: include all traditional Chinese medicine for  
2388 anti-tumor indications

|                         |                            |
|-------------------------|----------------------------|
| Huazhenghuisheng Pian   | Fukang Capsules            |
| Yadanziyou Ruanjiaonang | Xiaoai ping                |
| Zhemu Tangjiang         | Pingxiao Capsules          |
| Ban'ao                  | Pingxiao                   |
| Huachansu               | Shendan Sanjie Jiaonang    |
| Kang'ai Zhusheye        | Kanglixin Jiaonang         |
| Kanglaite               | Ankangxin Jiaonang         |
| Zhongjiefeng Zhusheye   | Bosheng Aining             |
| Yadanzi Youru Zhusheye  | Ezhuyou Putaotang Zhusheye |
| Aidi Zhusheye           | Kanglixin Jiaonang         |

Awei Huapi Gao

Cidan Capsules

Kangaiping Wan

2389

2390 3. Food: Fruits including grapefruit, pomelo or citrus maxima or any beverage

2391 containing the above-mentioned fruits should be avoided during the study.

2392

2393 **Appendix 4 Safety Data Report**

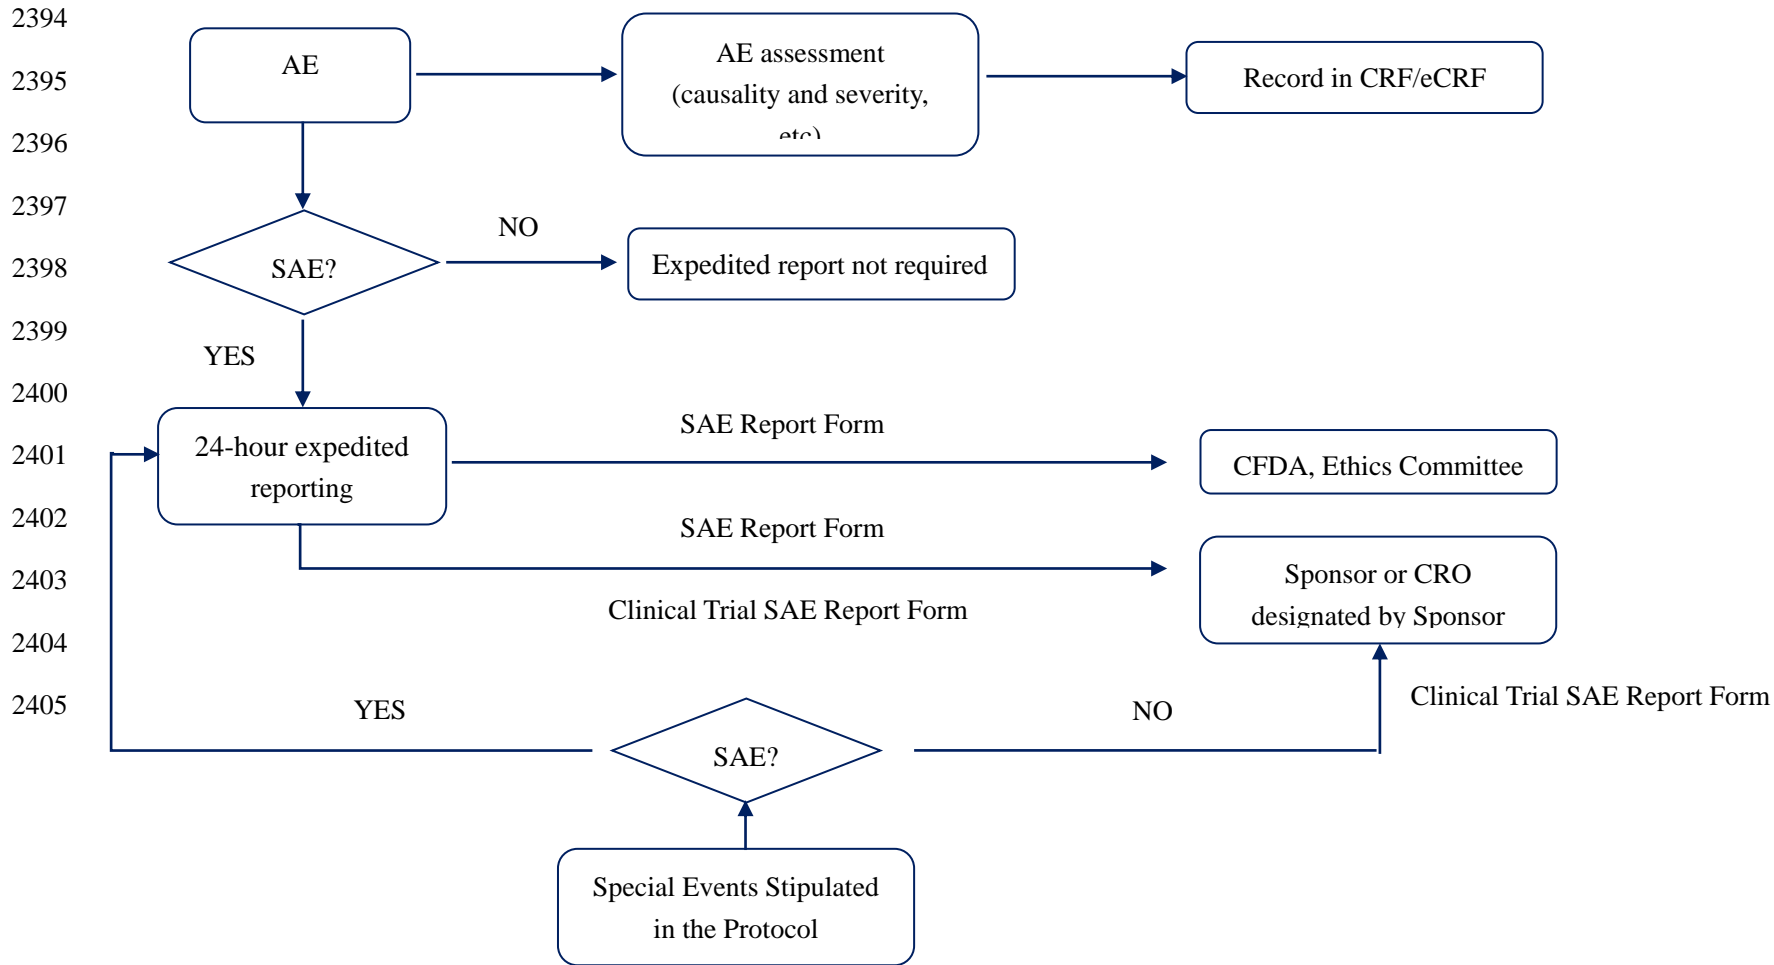

## 2406 **Appendix 5 Clinical Evaluation of Liver Damage**

2407 In accordance with the description of Section 7.1.3, repetitive blood biochemistry  
2408 tests and increased frequency of monitoring are required for subjects with confirmed  
2409 elevation of ALT/AST combined with increased total bilirubin (TbIL) (i.e. subjects  
2410 with special events stipulated by the Protocol), so as to further describe the trend of  
2411 biochemical indicators. In addition, it is necessary for investigators to exclude other  
2412 causes leading to abnormalities by inquiry of medical history, physical examination  
2413 and relevant auxiliary examinations.

2414 Usual causes that may result in liver damage:

- 2415 • Acute viral hepatitis
- 2416 • Alcoholic and autoimmune hepatitis
- 2417 • Biliary tract disease
- 2418 • Cardiovascular reasons

2419 Other less common causes may require consideration as well.

2420 The investigator is recommended to obtain the following information, so as to further  
2421 evaluate and follow up and complete the clinical data:

2422 ◆ Medical history of the subject

2423 ✧ Detailed history of current symptoms, diagnosis of complications and medical  
2424 history

2425 ✧ Previous medical history (viral hepatitis, alcoholic hepatitis, autoimmune disease,  
2426 biliary tract disease and cardiovascular disease, etc.)

2427 ✧ History of concomitant medication (including OTC and prescription drugs, herbal  
2428 medicine and dietary supplements), alcohol consumption, recreational drugs and  
2429 special diet

2430 ✧ History of exposure to chemicals

2431 ◆ Complete the following laboratory tests:

2432 ✧ Haematology

2433 ✧ Clinical biochemistry:

2434 ALT, AST, bilirubin (including total bilirubin and direct bilirubin), alkaline  
2435 phosphatase, albumin, PT or INR, amylase, fasting blood glucose, cholesterol  
2436 and triglycerides.

2437 ✧ Serum test:

2438 Hepatitis A (Anti-IgM and Anti-IgG), hepatitis B (HbsAg, Anti-HBs and

2439 HBV DNA), hepatitis C (Anti-HCV, and HCV RNA test is required for any  
2440 subject with positive test result), hepatitis D (Anti-IgM and Anti -IgG),  
2441 hepatitis E (Anti-HEV and Anti-HEV IgM).

2442 ◆ Complete appropriate auxiliary examination:

2443 ✧ Subjects with confirmed elevation of ALT/AST combined with TBil are required  
2444 to receive abdominal ultrasonography or other clinically applicable imaging  
2445 examination within 48 hours (to exclude biliary tract, pancreas or intrahepatic  
2446 causes, such as biliary calculi or tumor) and obtain the liver imaging result as  
2447 soon as possible. If the causes (such as biliary tract, pancreas or intrahepatic  
2448 causes) of abnormal hepatic result cannot be confirmed by imaging, paracentesis  
2449 is recommended for pathological examination after obtaining consent of the  
2450 subject;

2451 ✧ If suspected cardiovascular causes exist, cardiac ultrasonography is recommended  
2452 to exclude cardiovascular dysfunction (including right heart failure, etc.);

2453 Long-term follow-up: Perform close monitoring on the subject through repetitive tests  
2454 of ALT, AST and bilirubin (including total bilirubin and direct bilirubin) for at least  
2455 once a week till laboratory ALT and/or AST abnormality becomes stable or recovers,  
2456 and then proceed according to the protocol. Report the data through the eCRF.

2457

2458

2459 **Appendix 6 Treatment of Hypertension (Extracted from**  
2460 **Hypertension Treatment Guidelines)**

2461 **6.1 Treatment Goal:**

2462 Two treatment goals, i.e. a standard goal and a basic goal are set in this guideline,  
2463 since the nationwide unified health service and security system have not been  
2464 established completely at present, and significant distances exist among the economic  
2465 and social development of all provinces, municipalities and autonomous regions.

2466 Standard goal: For patients with confirmed hypertension, initial and sustainable  
2467 anti-hypertensive drugs (especially the antihypertensive medications that can control  
2468 blood pressure for 24 hours by using once daily) recommended in this guide shall be  
2469 used to achieve the blood pressure treatment goals on the basis of non-drug therapies.  
2470 Meanwhile, other reversible risk factors shall be controlled, and the subclinical target  
2471 organ damage and clinical disease detected should be effectively intervened.

2472 Basic goal: For patients with confirmed hypertension, any safe and effective  
2473 anti-hypertensive drugs (including short-acting drug at 2-3 times daily) reviewed and  
2474 approved by China Food and Drug Administration (CFDA) can be used to achieve the  
2475 blood pressure treatment goals on the basis of non-drug therapies. Meanwhile, other  
2476 reversible risk factors shall be controlled, and the subclinical target organ damage and  
2477 clinical disease detected shall be effectively intervened as far as possible.

2478 The Basic Principles of Hypertension Treatment:

- 2479 • Hypertension is an ongoing cardiovascular syndrome characterized by sustained  
2480 elevation of arterial blood pressure, and it is often accompanied by other risk  
2481 factors, target organ damage or clinical illness, so comprehensive intervention is  
2482 required.
- 2483 • Antihypertensive treatment includes non-drug and drug treatment. Most patients  
2484 need long-term, even lifelong treatment.
- 2485 • Regular measurement of blood pressure; treatment should be standardized and  
2486 treatment compliance should be improved, so as to achieve blood  
2487 pressure reduction and treatment goals as far as possible; keep long-term, stable  
2488 and effective control of blood pressure.

2489 The primary objective of hypertension treatment is to minimize the overall risks of  
2490 cardiovascular complications and death to the greatest extent. Therefore, intervention  
2491 in all other reversible cardiovascular risk factors (such as smoking, high blood

2492 cholesterol disease or diabetes, etc.) and proper treatment of a variety of co-existed  
2493 clinical conditions should be performed during the treatment of hypertension. Severity  
2494 is getting worse when risk factors increase. If there are other clinical conditions  
2495 accompanied, the absolute risk of cardiovascular disease will become higher, and the  
2496 intervention on these risk factors shall also be reinforced.

2497 There is a continuity relationship between the cardiovascular risk and blood pressure  
2498 within a wide range, and no minimum danger threshold exist even when the blood  
2499 pressure is lower than the so-called normal blood pressure range of 140/90 mmHg.  
2500 Therefore, every effort should be spent in achieving the anti-hypertension goal.

2501 It is found in the recent meta-analysis of previous antihypertensive clinical trials that  
2502 the cardiovascular "residual risk" of patients at high risk is still high after the  
2503 interventions of blood pressure, lipid and other risk factors, and the patient's long-term  
2504 prognosis is difficult to fundamentally improve. More effective intervention in the  
2505 earlier period is needed to change this situation, that is, providing more active  
2506 treatment to patients at low and moderate risks, and effective treatment in various  
2507 detected subclinical target organ damages to prevent or delay the progress of the  
2508 disease in such patients into high-risk stage.

2509 For population with high-normal blood pressure, antihypertensive therapy can be used  
2510 to prevent or delay the occurrence of hypertension, but large-scale clinical trial studies  
2511 are still needed to investigate whether antihypertensive therapy can reduce the risk of  
2512 cardiovascular complications.

#### Point 7 Treatment Goals

The primary objective of hypertension treatment is to minimize the overall risks of cardiovascular complications and death to the greatest extent. Treatment in all reversible cardiovascular risk factors, subclinical target organ damage and various of co-existing clinical diseases is required.

Anti-hypertension goal: For common hypertensive patients, blood pressure (systolic/diastolic) should be lowered to below 140/90mmHg; systolic blood pressure in the elder patients of 65 years or above should be controlled at below 150mmHg, which can be further reduced if tolerable; treatment for patients accompanied by kidney disease, diabetes, or patients with stable coronary heart disease or cerebrovascular disease should be individualized, and the blood pressure can be generally decreased to below 130/80mmHg. For patients with severe kidney disease, diabetes, coronary heart disease or cerebrovascular disease in the acute



phase, the management of blood pressure should comply with the applicable guidelines.

□□ For the patients with coronary heart disease whose diastolic blood pressure are below 60mmHg, blood pressure should be gradually lowered to the goal under close monitoring.

2513 Anti-hypertension goals for hypertensive patients: For common hypertensive patients,  
2514 blood pressure (systolic/diastolic) should be lowered to below 140/90mmHg; systolic  
2515 blood pressure in elder patients of 65 years or above should be controlled below  
2516 150mmHg, which can be further reduced if tolerable; the treatment for patients  
2517 accompanied by kidney disease, diabetes, or patients with stable coronary heart  
2518 disease or cerebrovascular disease should be individualized, the blood pressure can be  
2519 generally decreased below 130/80mmHg. For the patients with severe kidney disease,  
2520 diabetes, coronary heart disease or cerebrovascular disease in acute phase, the  
2521 management of blood pressure should comply with the applicable guidelines. For  
2522 patients with coronary heart disease whose diastolic blood pressures are below  
2523 60mmHg, blood pressure should be gradually lowered to the goal under the close  
2524 monitoring.

## 2525 5.2 Treatment Strategy

### 2526 5.2.1 Stratification by Low Risk, Moderate Risk, High Risk and very High Risk

2527 Comprehensive assessment of the overall risks of the patients should be performed,  
2528 and the treatment decisions should be made based on risk stratification.

2529 Patients with very high risks: Comprehensive treatment of hypertension with the  
2530 co-existed risk factors and clinical conditions should be immediately started;

2531 Patients with high risks: The drug treatment of hypertension with the co-existed risk  
2532 factors and clinical conditions should be immediately started;

2533 Patients with moderate risks: Firstly, the blood pressure and other risk factors of  
2534 patients should be observed for several weeks to assess the damage of target organ,  
2535 and then decide whether and when to start the drug treatment.

2536 Patients with low risks: Observe the patients for a longer time, measure the blood  
2537 pressure repeatedly, and try to perform 24-hour ambulatory blood pressure monitoring  
2538 to assess the damage of target organ, and then decide whether and when to start the  
2539 drug treatment.

### 2540 5.3 Non-drug Therapies (lifestyle Intervention)

2541 The non-drug therapies in this guideline mainly refer to lifestyle intervention, i.e. to

2542 get rid of the behaviors and habits that may influence of the physical and mental  
2543 health. It can not only prevent or delay the occurrence of high blood pressure, but also  
2544 lower the blood pressure, improve the efficacy of antihypertensive drugs and then  
2545 reduce cardiovascular risk. Specific contents are summarized as follows:

#### 2546 5.3.1 Reducing Sodium Intake

2547 Sodium can significantly increase blood pressure and the risk of hypertension, while  
2548 potassium can lower the increased blood pressure caused by sodium. The sodium  
2549 intake of residents all over China is significantly higher than that current  
2550 recommended amount by World Health Organization, which is less than 6 grams per  
2551 day. However, potassium intake is of great deficiency, so all the patients with  
2552 hypertension should take various measures to reduce the sodium intake and increase  
2553 potassium intake in food. The main measures include:

- 2554 • Minimizing cooking salt by using recommended quantitative salt spoon;
- 2555 • Reducing the amount of condiments containing sodium such as aginomoto and  
2556 soy;
- 2557 • Eating less or avoid eating various types of processed foods containing high  
2558 amounts of sodium, such as pickles, ham, sausage and all kinds of roasted seeds  
2559 and nuts;
- 2560 • Increasing the intake of vegetables and fruits;
- 2561 • For patients with good renal function, using cooking salt containing potassium.

#### 2562 5.3.2 Weight Control

2563 Overweight and obesity are among the important causes of high blood pressure, and  
2564 the central obesity typically characterized by accumulation of abdominal fat will  
2565 further increase the risks of hypertension and other cardiovascular and metabolic  
2566 diseases. Blood pressure can be significantly reduced by decreasing the weight gain  
2567 appropriately and reducing body fat.

2568 The most effective measure to lose weight is to control energy intake and do more  
2569 physical activities. The principle of a balanced diet should be followed, to control the  
2570 intake of high-calorie foods (high-fat foods, sugared beverages and alcohol, etc.), and  
2571 control staple food (carbohydrates) properly. Considering sports, regular aerobic  
2572 exercise of moderate intensity is an effective way to control weight. Weight loss rate  
2573 varies from person to person, and a rate of 0.5~1 kg per week is appropriate. For  
2574 patients with severe obesity who failed to non-drug measures of weight loss, weight  
2575 loss drugs can be used to control weight under the guidance of a doctor.

#### 2576 5.3.3 Avoid Smoking

2577 As an unhealthy behavior, smoking is one of the main risk factors of cardiovascular  
2578 disease and cancer. Passive smoking also significantly increases the risk of  
2579 cardiovascular disease. Smoking can lead to vascular endothelial damage,  
2580 significantly increase the risk of atherosclerotic disease in hypertension patients. It  
2581 couldn't be surer for the benefits of quitting smoking, and people can benefit from  
2582 smoking cessation at any age. Tobacco dependence is a chronic disease of addiction, it  
2583 is difficult to quit and the recurrence rate is also high. Therefore, physicians should  
2584 strongly recommend and urge the patients to quit smoking, and encourage patients to  
2585 seek medication for smoking cessation (use of nicotine substitutes, Bupropion  
2586 sustained-release tablets and varenicline, etc.), meanwhile patients who successfully  
2587 quit smoking should be followed up and supervised to avoid to resume smoking.

#### 2588 5.3.4 Alcohol Restrictions

2589 Long-term heavy drinking can lead to high blood pressure, and restrictions on alcohol  
2590 consumption can significantly reduce the risk of hypertension. There are numbers of  
2591 long-term heavy male drinkers in China, and also female drinkers in several other  
2592 minority groups (such as the ethnic minority group). All investigators should control  
2593 alcohol consumption of the patients. Daily alcohol intake should be no more than 25  
2594 grams for men and 15 grams for women. Patients with hypertension are not advocated  
2595 of drinking, and it should be at small amount when drinking: the amount of liquor,  
2596 wine (or rice wine) and beer should be less than 50ml, 100ml and 300ml, respectively.

#### 2597 5.3.5 Physical Activities

2598 General physical activities can increase energy consumption and is good for health.  
2599 Regular physical exercises can bring significant therapeutic effect in reducing blood  
2600 pressure and improving glucose metabolism. Therefore, appropriate physical activities  
2601 for about 30 minutes every day is recommend; and aerobic physical exercise of more  
2602 than once per week should be done, such as walking, jogging, cycling, swimming,  
2603 aerobics, dancing and non-competitive rowing and so on. Typical physical activity  
2604 program includes 3 stages: ①mild warm-up activities of 5~10 minutes; ②aerobic  
2605 exercise endurance activities of 20~30 minutes or; ③relaxation phase for about 5  
2606 minutes, gradually reducing the force, so that the reaction of cardiovascular and  
2607 cerebrovascular system and body heat function can be gradually stabilized. The form  
2608 and amount of exercise should be based on individual physical conditions.

#### 2609 5.3.6 Reduction of Mental Pressure and Maintenance of Psychological Balance

2610 Psychological or mental pressure can cause psychological stress (response), which is  
2611 the body response to the environment, psychological and physiological factors.

2612 Long-term and excessive psychological reactions, especially negative psychological  
2613 response can significantly increase cardiovascular risk. The main reasons for the  
2614 increase in mental stress consist of excessive work and life pressures and morbid  
2615 psychology, including depression, anxiety, A-type personality (a character featured  
2616 with hostile, aggressive, jealous and time urgency), social isolation and lack of social  
2617 support, etc. Various measures should be taken to help the patients to prevent and  
2618 relieve stress as well as the correction and treatment of morbid psychology and,  
2619 advise patients to seek professional psychological counseling or treatment if  
2620 necessary.

#### 2621 5.4. Drug Therapies for Hypertension

##### 2622 5.4.1. Objectives of Anti-hypertension and Gradual Goals Achievement

2623 1) Objectives of anti-hypertension treatment: The objectives of anti-hypertension  
2624 treatment in patients with hypertension are: a) to effectively prevent or prolong the  
2625 time to delay the occurrence of cardio-cerebrovascular complications, e.g. stroke,  
2626 cardiac infarction, cardiac failure and renal deficiency by decreasing the blood  
2627 pressure; b) to effectively control the disease progress and prevent the occurrence of  
2628 severe hypertension, e.g. acute hypertension or sub-acute hypertension. The  
2629 previously performed studies of anti-hypertension therapies which used diastolic  
2630 pressure (>90 mmHg) as inclusion criteria indicated that, the risk of stroke and  
2631 ischemic heart disease would be reduced by 40% and 14% respectively with the  
2632 diastolic pressure decrease of 5 mmHg (systolic pressure decreased 10 mmHg); later  
2633 studies of anti-hypertension therapy focused on systolic pressure (systolic  
2634 pressure>160 mmHg, diastolic pressure <90 mmHg) indicated that, the risk of stroke  
2635 and ischemic heart disease would be reduced by 30% and 23% respectively with the  
2636 systolic pressure decrease of 10 mmHg (diastolic pressure decrease of 4 mmHg).

2637 2) Ways of achieving standard blood pressure: The risk of cardio-cerebrovascular  
2638 complications would be significantly reduced by lowering the blood pressure to the  
2639 target levels of below 140/90 mmHg, 130/80 mm Hg for patients of high risks,  
2640 systolic pressure of 150 mmHg for the seniors. But it is unknown whether the patients  
2641 can still benefit from further anti-hypertension treatment after achieving the above  
2642 target levels. Studies have shown that the risk of cardio-vascular events may be  
2643 increased when the diastolic pressure of older patients with diabetes or coronary heart  
2644 disease is reduced to below 60 mmHg.

2645 Blood pressure should be lowered to the above target levels timely, but it is not the  
2646 quicker the better. For most patients with hypertension, the blood pressure should be

2647 lowered to the target level gradually within several weeks to several months (not  
2648 several days) according to their disease condition. For patients with hypertension at  
2649 younger age or with a shorter process, the lowering of blood pressure may take a  
2650 shorter time; however, for patients with hypertension at older age, with longer process  
2651 or with target organ damage or complications, the lowering of blood pressure should  
2652 take a relatively longer time.

2653 3) Timing for anti-hypertension drug therapies: Patients with high risks, very high  
2654 risks or grade 3 hypertension should start anti-hypertension drug therapy immediately.  
2655 Patients with diagnosed grade 2 hypertension should consider to start  
2656 anti-hypertension drug therapies; patients with diagnosed grade 1 hypertension can  
2657 start anti-hypertension drug therapies when the blood pressure remains  $\geq 140/90$   
2658 mmHg after several weeks of lifestyle intervention.

#### 2659 5.4.2. Clinical Trial Evidence of Anti-hypertension Therapies

2660 The theoretical basis for the treatment and management of anti-hypertension has been  
2661 established by a randomized, controlled, anti-hypertension treatment clinical trial  
2662 which used the cardio-cerebrovascular complications as the primary study objective.  
2663 Dozens of clinical trials in patients with hypertension have been conducted around the  
2664 world since 1950s, and the trials were mainly divided into 4 types. In the earlier  
2665 anti-hypertension treatment clinical trials, the primary objective was to find out if  
2666 active anti-hypertension treatments could significantly reduce the risk of  
2667 cardio-cerebrovascular complications compared to placebo or non-treatment. All the  
2668 results of these trials showed that, anti-hypertension treatment could reduce the risk of  
2669 cardio-cerebrovascular complications in patients with various types of hypertension  
2670 by lowering the blood pressure, which turns out to be the most important theoretical  
2671 basis for the treatment and management of various types of hypertension.

2672 Several clinical trials have been conducted between different kinds of drugs based on  
2673 this theory. The purpose of these trials was to investigate whether new  
2674 anti-hypertensive drugs (e.g. calcium channel blocker [CCB], angiotensin-converting  
2675 enzyme inhibitor (ACEI), Angiotensin receptor antagonist (ARB)) can prevent  
2676 cardio-cerebrovascular complications more effectively compared with the traditional  
2677 anti-hypertensive drugs (e.g. thiazine diuretic, Beta blockers). The results of these  
2678 clinical trials have indicated that, the main reason for these drugs to reduce the  
2679 cardio-cerebrovascular complications was lowering blood pressure, and the overall  
2680 difference between drugs was very small, however, there was still significant  
2681 difference when the drugs were used to treat specific complications, such as, CCB

2682 was the most effective drug for treating stroke. Difference can be great between  
2683 various combined therapies, e.g. the combined therapy of CCB and ACEI can prevent  
2684 the cardio-cerebrovascular complications more effectively compared with the  
2685 combined therapy of ACEI and thiazine diuretic and that of Beta blockers and thiazine  
2686 diuretic. Compared to the monotherapy of ACEI or ARB, the ACEI+ARB combined  
2687 therapy can increase the risk of complications such as adverse reactions and renal  
2688 dysfunction instead of lowering the risks of cardio-cerebrovascular complications  
2689 more effectively.

2690 There are mainly two types of anti-hypertension therapy clinical trials in recent years.  
2691 One type is to find out an optimal target hypertension level in hypertensive patients by  
2692 comparing the patients with treatment intensification and patients without. The other  
2693 type is to investigate whether the lower hypertension level can reduce the risks of  
2694 cardio-cerebrovascular complications more efficiently in population at high risks of  
2695 cardio-cerebrovascular complications. The blood pressure levels of the patients at  
2696 enrollment were not considered usually, so there were hypertensive patients, patients  
2697 with normal blood pressure and patients whose blood pressure had been controlled to  
2698 normal included in the trials. In the group with lower blood pressure, significant  
2699 decrease in the risk of some complications was observed, but with rising trend in the  
2700 risk of some other complications. These results of the trials suggested that, after  
2701 achieving the target level of below 140/90 mmHg, individualized anti-hypertension  
2702 treatment should be used, and the disease conditions of the patients, the composition  
2703 and conduction of the anti-hypertensive regimen should be fully considered.

2704 Although most of the anti-hypertension treatment clinical trials have been performed  
2705 in European countries and America, China has also independently conducted a series  
2706 of clinical trials in this field and made contributions to many international multicenter  
2707 trials. It was confirmed in the earlier anti-hypertension treatment clinical trial  
2708 (Syst-China) conducted in the systole of the Chinese old people and the trials of  
2709 Nifedipine conducted in Shanghai (STONE) and Chengdu (CNIT), that active  
2710 anti-hypertensive regimen based on CCB (e.g. Nitrendipine, Nifedipine) may reduce  
2711 the occurrence and mortality of strokes in Chinese hypertensive patients. According to  
2712 this, the FEVER study (Felodipine decreases the risk of complications) showed that  
2713 the combined therapy of Hydrochlorothiazide and Felodipine could decrease the  
2714 occurrence of fetal and non-fetal strokes by 27% when compared to the monotherapy  
2715 of Hydrochlorothiazide, though the blood pressure had been further decreased by 4/2  
2716 mmHg after adding Felodipine. It was discovered after the advanced conduction and

2717 analysis of the FEVER study, that the risk of stroke, heart event and overall mortality  
2718 were the lowest when the blood pressure was below 120/70mmHg after treatment.  
2719 The interim report of the ongoing Chinese Hypertension Intervention Efficacy Study  
2720 (CHIEF) shows that the combined therapy of the initial small dose of Amlodipine and  
2721 Telmisartan or Compound Amiloride can apparently lower the blood pressure of  
2722 hypertensive patients and achieve a control rate of 80%, which indicates that the  
2723 combined therapy based on calcium channel blockers is one of the optimized  
2724 anti-hypertensive therapies for the hypertensive patients in China.

2725 In addition to the above primary prevention anti-hypertension clinical trials, China has  
2726 contributed to the secondary prevention post-stroke anti-hypertension clinical trials.  
2727 Post-Stroke Antihypertensive Treatment Study (PATS) conducted independently by  
2728 China is the first international placebo-controlled secondary prevention post-stroke  
2729 anti-hypertension clinical trial in a large scale. The results of the study showed that  
2730 the blood pressure was lowered by 5/2 mmHg and the occurrence of stroke by 29%  
2731 Indapamide-treated group (2.5mg/d) compared with placebo-treated group. China has  
2732 also taken an active part in PROGRESS study later on, and recruited 1/4 patients of  
2733 the whole study (6105 patients). The study results indicated that the combined therapy  
2734 of Perindopril and Indapamide or the monotherapy of Perindopril reduced the overall  
2735 recurrence of stroke by 28%, and the combined therapy turned out to be more  
2736 effective than the monotherapy in reducing blood pressure. The analysis results of the  
2737 subgroup indicated that there was a greater reduction in the risk of stroke in Asian  
2738 population (e.g. China and Japan). The results of the post-hoc analysis indicated that  
2739 the mean post-treatment blood pressure was lowered to 112/72mmHg but no J shaped  
2740 curve was observed. The 1520 patients recruited by China were further followed up,  
2741 and the mean data of 6-years' follow-up confirmed that hypertensive treatment  
2742 reduced the recurrence of stroke obviously, and the overall mortality and risk of  
2743 cardiac infarction were on a declining curve.

2744 The scholars in China have also taken an active part in two important studies, HYVET  
2745 study (HYVET, n=3845) and ADVANCE study (ADVANCE, n=11140), and help  
2746 recruited about 40% and 30% patients respectively. The results of HYVET study  
2747 showed that when the anti-hypertensive treatment was performed in hypertensive  
2748 patients of advanced age (>80 yrs) whose systolic pressure was above 160 mmHg, the  
2749 sustained release Indapamide (1.5mg/d) lowered the systolic pressure to 150 mmHg  
2750 and the risk of stroke and death was lowered compared to placebo. However,  
2751 ADVANCE study results showed that when anti-hypertensive treatment of Perindopril

2752 (2-4mg)/Indapamide (0.625-1.25mg) in small dose was provided to patients with  
2753 diabetes, the blood pressure was lowered by 5.6/2.2 mmHg to an average level of  
2754 135/75 mmHg compared to the conventional treatments. The endpoint events of great  
2755 vessels combined with capillaries were lowered by 9%.

2756 The results of ALLHAT study suggested that there was no significant difference in the  
2757 effect of Amlodipine, Lisinopril and Chlorthalidone on coronary events. VALUE study  
2758 confirmed that earlier control of blood pressure may contribute in reducing the risks  
2759 of cardiovascular events. It was demonstrated in the Cardiac Insufficiency Bisoprolol  
2760 Study II (CIBIS-2) that Bisoprolol could obviously decrease cardiovascular death and  
2761 the overall mortality in patients with congestive heart failure. The subgroup analysis  
2762 of ACTION study showed that when Nifedipine controlled release tablets were used  
2763 to treat hypertensive patients accompanied with coronary heart disease, the risk of  
2764 cardiovascular events was significantly reduced.

2765 The combination treatment trials provided clear evidence. In the LIFE study, the  
2766 hypertensive patients with left ventricular hypertrophy were randomly treated, and the  
2767 results showed Losartan±Hydrochlorothiazide group had better effect in reducing  
2768 complex cardiovascular events compared with the Atenolol±Hydrochlorothiazide  
2769 group. The results of ASCOT-BPLA study showed that the Amlodipine±Perindopril  
2770 could lower the risk of cardiovascular events more effectively compared to the  
2771 Atenolol±Bendrofluazide. The ACCOMPLISH study results showed that  
2772 Benazepril+Amlodipine combination therapy had better results in reducing complex  
2773 endpoint events compared with Benazepril+Hydrochlorothiazide. The ONTARGET  
2774 study results indicated the monotherapy of Telmisartan or Ramipril could reduce the  
2775 risk of cardiovascular events, but no difference was observed in main complex  
2776 cardiovascular endpoint events when treated with the combination therapy of the two  
2777 drugs. ONTARGET and HOPE study suggested that ARB or ACEI could prevent  
2778 cardiovascular events of patients with high risks of cardiovascular disease (coronary  
2779 heart disease, brain stroke, peripheral vascular disease, diabetes with target-organ  
2780 damage).

2781 Dispute about the target blood pressure level for some hypertensive patients at high  
2782 risk arose in their hypertensive treatment. The ACCORD and INVEST studies showed  
2783 that for older diabetic patients mainly with coronary heart disease, when the systolic  
2784 pressure was reduced to below 115-120mmHg through anti-hypertension treatment,  
2785 the risk of cardiovascular events was increased. However, the HOT study results  
2786 suggested that cardiovascular events could be reduced when the diastolic pressure was



2787 lowered to below 80mmHg.

2788 In short, anti-hypertension therapies can reduce the risks of cardio-cerebrovascular  
2789 complications efficiently in various types of hypertensive patients. The overall  
2790 difference was small in CCB, ACEI, ARB, thiazide-type diuretics and Beta blockers,  
2791 however, there may be significant difference when the drugs or their combination  
2792 therapies were used to treat specific complications. CCB or diuretics was the most  
2793 effective drug among them when preventing stroke. ACEI or ARB had better effect in  
2794 protecting target organ. And Beta blockers were better in preventing heart disease.

2795 According to the above statements, the risk of hypertensive patients depends not only  
2796 on BP level, but also on the complications, co-existing conditions and other  
2797 cardiovascular risk factors. Hyperhomocysteinemia is the most common risk factor  
2798 for Chinese hypertensive patients apart from diabetes and dyslipidemia, and it has  
2799 significant positive correlation with the risk of brain stroke, whose risks can be  
2800 increased by it. It is showed in multivitamin treatment trials independently conducted  
2801 by China and the meta analysis of folic acid treatment trials that supplement of folic  
2802 acid can significantly reduce the risk of brain stroke (-18%). However, larger scale  
2803 clinical trials about the prevention of brain stroke in Chinese hypertensive patients by  
2804 supplement of folic acid are still needed.

2805 With the rapid development of the hypertension target organ subclinical lesion  
2806 detection technique in recent years, such as ultrasound cardiogram in detecting left  
2807 ventricular hypertrophy, and vascular ultrasound in detecting intima-media thickness  
2808 (IMT), proteinuria and new onset diabetes mellitus ,etc., as well as the extensive  
2809 clinical trials with the primary objective of intermediate vascular detection indicator,  
2810 subgroup analysis and post-hoc analysis aiming at intermediate detection indicator are  
2811 increasing in recent years. These studies play an important role in probing the damage  
2812 mechanism of hypertension and the protection mechanism of anti-hypertension  
2813 treatment due to the small sample size required and the availability of obvious  
2814 observation results within one year. But due to the complexity of the detection  
2815 technique, many risk factors, the uncertainty of the correlation of  
2816 cardio-cerebrovascular complications and the inconsistency of the study results at  
2817 times, that whether the intermediate measurement indicators clinical trials can take  
2818 place of those with big sample size, long period, aiming at cardio-cerebrovascular  
2819 complications still deserves further investigation.

#### 2820 5.4.3. Basic Principle for the Use of Anti-hypertensive Drugs

2821 The use of anti-hypertensive drugs should follow 4 principles, i.e. starting with small

2822 dose, preference for long-acting drugs, combined use and individualized treatment.

2823 1) Small dose: Small therapeutic dose should be selected at initial treatment, and the  
2824 dose can be gradually increased as required. Since long-term or even life-time use of  
2825 anti-hypertensive drugs is needed, and the safety and tolerability of the drugs are  
2826 considered of more importance than the efficacy.

2827 2) Preference for long-acting drugs: Long-acting drugs with 24-hour anti-hypertension  
2828 effect are preferred so as to control the nighttime BP and morning surge, thus  
2829 effectively preventing of cardio-cerebrovascular complications. If the intermediate or  
2830 short-acting drugs are taken, it needs to be taken 2-3 times daily in order to achieve  
2831 stable BP.

2832 3) Combined use: It has better anti-hypertensive effect and less adverse reactions. The  
2833 combination therapy of two or more anti-hypertensive drugs can be used when the  
2834 monotherapy of drug at low dose is not satisfying. In fact, combined therapy is often  
2835 required for patients with grade 2 or above hypertension to achieve stable BP. For  
2836 patients with  $BP \geq 160/100\text{mmHg}$  or at intermediate or higher risks, combined  
2837 therapy at low dose or fixed compound preparation at low dose can be used.

2838 4) Individualized treatment: Anti-hypertensive drugs should be selected according to  
2839 the patient's condition, individual willingness or long-term tolerability.

#### 2840 5.4.4. Types and Characteristics of Common Anti-hypertensive Drugs

2841 Common anti-hypertensive drugs include calcium channel blocker (CCB),  
2842 angiotensin-converting enzyme inhibitor (ACEI), Angiotensin receptor antagonist  
2843 (ARB), diuretics,  $\beta$  blockers (Table 5-1) and the compound preparations of fixed ratio  
2844 of the above drugs. In addition,  $\alpha$ -receptor blocker or anti-hypertensive drugs of other  
2845 types can be applied to some hypertensive population.

2846 CCB, ACEI, ARB, diuretics, Beta blockers and compound preparations of fixed ratio  
2847 at low dose can be used as initial medication or long-term medication, monotherapy  
2848 or combination therapy (Table 5-1). Though the above anti-hypertensive drugs are all  
2849 recommended as initial medication or long-term medication, it cannot be taken for  
2850 granted that the drugs can be used at one's will or that the drugs have the same chance  
2851 to be selected for initial medication. However, certain type of anti-hypertensive drug  
2852 should be prioritized based on the patients' risk factors, subclinical target organ  
2853 damage and the co-existing medical conditions (which are sometimes referred to as  
2854 compelling Indication).

2855 1) Calcium channel blocker: vessel dilation and blood pressure reduction are achieved  
2856 when the calcium channel blocker blocks the calcium channel on the vascular smooth

2857 muscles. Calcium channel blocker includes dihyridin type of calcium antagonists and  
2858 non-dihyridin type of calcium antagonists. The former comprises of Nifedipine,  
2859 Nitrendipine, lacidipine, Amlodipine and Felodipine. Previous anti-hypertensive  
2860 treatment clinical trials with big sample size conducted in China were mainly using  
2861 the dihyridin type of calcium antagonists as study drug, and it was confirmed that  
2862 anti-hypertensive treatment based on dihyridin type of calcium antagonists could  
2863 reduce the risk of brain stroke in hypertensive patients significantly. This type of drug  
2864 can be combined with the other 4 types, especially for elderly hypertension patients,  
2865 patients with isolated systolic hypertension, hypertensive patients accompanied with  
2866 stable angina pectoris, coronary sclerosis, artery atherosclerosis or peripheral vascular  
2867 disease. Common adverse effects include tachycardia caused by reflexive  
2868 sympathetic activation, flushing, edema in ankles, and gingival hyperplasia, etc. There  
2869 are no absolute contraindications for dihyridin type of CCB, but patients with  
2870 tachycardia or cardiac failure should use them with caution. If the patients must be  
2871 treated with this type of drugs, then certain preparation such as molecular long-acting  
2872 drug Amlodipine should be selected cautiously. Usually, the short-acting Nifedipine is  
2873 not recommended for patients with acute coronary syndromes.

2874 Clinically common non-dihyridin type of calcium antagonists include Verpamil and  
2875 Diltiazem, both of which can be used for anti-hypertensive treatment. While the  
2876 common adverse effects are inhibition of cardiac systolic function and conduction,  
2877 and sometimes gingival hyperplasia. Patients with II or III atrioventricular block or  
2878 cardiac failure are prohibited to use. Therefore, questioning of detailed medical  
2879 history and ECG examination should be performed before taking non-dihyridin type  
2880 of CCB, and re-examination within 2-6 weeks after starting the medication is  
2881 required.

2882 2) ACEI: ACEI can reduce blood pressure by inhibiting the Angiotensin-converting  
2883 enzyme inhibitors' reducing the activity of the renin-angiotensin-aldosterone system  
2884 (RAAS). Frequently prescribed ACE inhibitors include captopril, enalapril,  
2885 Benazepril, Ramipril and Perindopril, etc. A large number of clinical trials with big  
2886 sample size have been conducted in European and American populations, whose  
2887 results have showed that this type of drug can protect the target organ and prevent the  
2888 cardiovascular endpoint events of hypertensive patients. ACEI demonstrates good  
2889 anti-hypertensive effect when used alone, and it has no adverse effect in glucolipid  
2890 metabolism. Lowering salt assumption or adding diuretics may help increase the  
2891 anti-hypertensive effect, especially for patients with chronic heart failure, myocardial

2892 infarction accompanied with cardiac insufficiency, diabetic nephropathy, non-diabetic  
2893 nephropathy, metabolic syndrome, proteinuria, or microalbuminuria. Persistent dry  
2894 cough is a relatively common adverse effect in the early period of administration, and  
2895 patients with mild symptoms can continue the medication, but for patients who are  
2896 intolerable, ARB is often used instead. Other adverse reactions include hypotension,  
2897 rash, occasional seen angioneurotic edema and dysgeusia. And long-term use of ACEi  
2898 may result in increased serum potassium, therefore, regular examination of the serum  
2899 potassium and serum creatinine should be performed. The ACE inhibitors are  
2900 contraindicated in patients with bilateral renal artery stenosis, hyperkalemia and  
2901 pregnant women.

2902 3) ARB: ARB can lower the BP by blocking the activation of angiotensin II AT1  
2903 receptors. Common ARB inhibitors include Losartan, Valsartan, Irbesartan, and  
2904 Telmisartan, etc. A large number of clinical trials with big sample size have been  
2905 conducted in European and American population, whose results have showed that  
2906 ARB can lower the risk of cardiovascular events of hypertensive patients, and  
2907 proteinuria, or microalbuminuria of the diabetic patients or nephritic patients, and  
2908 especially for patients with left ventricular hypertrophy, cardiac failure, atrial  
2909 fibrillation (for prevention), diabetic nephropathy, metabolic syndrome, proteinuria, or  
2910 microalbuminuria and patients who are intolerant to ACEI. Adverse reactions are  
2911 rare, except for occasional diarrhea. Serum potassium may be increased by long-term  
2912 use, therefore, regular examination of the serum potassium and serum creatinine  
2913 should be performed. The ARB inhibitors are contraindicated in patients with bilateral  
2914 renal artery stenosis, hyperkalemia and pregnant women.

2915 4) Diuretics: the anti-hypertension is realized by promoting urine output and lowering  
2916 high blood volume load. Diuretics include Thiazide-type diuretics, loop diuretic,  
2917 potassium-sparing diuretics and aldosterone antagonists. Thiazide-type diuretics are  
2918 mainly used to control BP. In China, common Thiazide-type diuretics are  
2919 Hydrochlorothiazide and Indapamide. PATS study has confirmed that Indapamide  
2920 treatment could apparently reduce the relapse of stroke. Thiazide-type diuretics at low  
2921 dose (e.g. Hydrochlorothiazide 6.25-25mg) have little effect on metabolism, and its  
2922 anti-hypertensive reaction (of the other type) can be significantly enhanced when  
2923 combined with other anti-hypertensive drugs (especially ACEI or ARB). Diuretics are  
2924 particularly fit for old and elderly patients with hypertension, isolated systolic  
2925 hypertension or cardiac failure, and it is one of the fundamental drugs for refractory  
2926 hypertension. Due to the close relationship between adverse reactions and dose, low

2927 dose is usually adopted. Thiazide-type diuretics can result in hypokaliemia, therefore,  
2928 regular examination of the serum potassium and supplement of potassium should be  
2929 performed for long-term users. Diuretics are contraindicated in patients with gout.  
2930 And patients with hyperuricemia or obvious renal deficiency should use Diuretics  
2931 with caution, and when required, loop diuretic, such as Furosemide should be  
2932 considered.

2933 Potassium-sparing diuretics (e.g. Amiloride) and Aldosterone antagonists (e.g.  
2934 Spironolactone) may be applied to control BP at times. Thiazide-type diuretics will  
2935 not increase the discharge of potassium while promoting urine output. The risks of  
2936 hyperkalemia should be noticed when combined with potassium-sparing  
2937 anti-hypertension drugs (e.g. ACEI or ARB). Long-term use of Spironolactone may  
2938 result in adverse reactions such as gynecomasty.

2939 5)  $\beta$ -receptor blocker: Beta blockers can lower BP by suppressing the activities of  
2940 over-activated sympathetic nerve system, myocardial contraction and slowing down  
2941 heart rate. Common  $\beta$ -receptor blockers include Metoprolol, Bisoprolol, Carvedilol  
2942 and Atenolol. Metoprolol and Bisoprolol have high selectivity for  $\beta_1$  receptor, and  
2943 they can block  $\beta_2$  receptor with less adverse reactions. They can lower BP, protect  
2944 target organ and reduce the cardiovascular events.  $\beta$  blocker is particularly applicable  
2945 for hypertensive patients with tachyarrhythmia, coronary angina pectoris, chronic  
2946 heart failure, enhanced sympathetic nerve system activity and hyperdynamic status.  
2947 Common adverse reactions include fatigue, cold extremities, unrest, upset stomach,  
2948 and it may also influence glucose and lipid metabolism.  $\beta$  blocker is contraindicated  
2949 in patients with advanced heart block and asthma. Patients with chronic obstructive  
2950 pulmonary disease, Peripheral vascular disease or abnormal glucose tolerance and  
2951 athletes should use with caution.  $\beta$  blocker with high selectivity can be selected with  
2952 caution as necessary. Rebound reaction (i.e. worsening of the existing symptoms or  
2953 occurring of new symptoms) may happen due to a sudden interruption during  
2954 long-term use, and the common rebound reactions include rebound elevated BP,  
2955 headache, anxiety, which are called withdrawal syndrome.

2956 6)  $\alpha$ -receptor blocker: It is not used as the first choice for treatment of hypertension,  
2957 and it applies for hypertensive patients with prostatic hyperplasia, and refractory  
2958 hypertension. The initial dose should be taken before bedtime, so as to avoid postural  
2959 hypotension. Sitting BP should be measured during medication and the  
2960 controlled-release preparation should be used.  $\alpha$ -receptor blocker is contraindicated  
2961 for patients with postural hypotension. Patients with cardiac failure should use with

2962 caution.

2963 7) Renin Inhibitors: a new type of anti-hypertensive drugs, represented by Aliskiren,  
2964 and it can significantly reduce BP of the hypertensive patients, but clinical trials with  
2965 big sample size to assess the effect on cardiovascular events are still needed.

#### 2966 5.4.5. Combined Use of Anti-hypertensive Drugs

2967 1) Purpose of combined medication: combined use of anti-hypertensive drugs has  
2968 become a fundamental method for anti-hypertensive treatment. At least 2 types of  
2969 anti-hypertensive drugs are required for many hypertensive patients to achieve the  
2970 goal of BP lowering.

2971 2) Indications of combined medication: for high-risk patients with grade II  
2972 hypertension and (or) with many risk factors, target organ damage or clinical  
2973 conditions, the initial therapy generally require 2 anti-hypertensive drugs at low dose.  
2974 Dose increase base on the initial therapy or 3 or 4 anti-hypertensive drugs are  
2975 acceptable if the BP level couldn't be achieved.

2976 3) Methods of combined medication: the mechanism of the 2 drugs should be  
2977 complementary for each other when used in combination. Therefore, the adverse  
2978 reactions would be cancelled or relieved by the combination. For example, adding  
2979 Thiazide-type diuretics at low dose in the combination of ACEI or ARB will achieve  
2980 or exceed 2 times of the original anti-hypertensive effect of ACEI or ARB. Similarly,  
2981 adding Dihydropyridines CCB would have the same effects. For detailed information  
2982 of combination regimen, see Table 5-2:

2983 (1) ACEI or ARB+Thiazide-type diuretics: the adverse reaction of diuretics is to  
2984 activate RAAS, imposing bad effects on lowering BP. While used in combination with  
2985 ACEI or ARB, the bad effects can be cancelled. In addition, since ACEI and ARB can  
2986 increase the serum potassium level, the adverse reactions such as Hypokalemia lead  
2987 by long-term use of Thiazide-type diuretics can be prevented. ARB or ACEI+  
2988 Thiazide-type diuretics combination has good anti-hypertensive effects due to its  
2989 synergistic effect.

2990 (2) Dihydropyridines CCB+ACEI or ARB: as the former has direct effect of dilating  
2991 artery, and the latter blocks RAAS, the combination can dilate both artery and vein, so  
2992 the two drugs have synergistic effect. The commonly seen edema in ankles caused by  
2993 Dihydropyridines CCB can be removed by ACEI or ARB. CHIEF study showed that  
2994 long-acting Dihydropyridines calcium antagonist channel blockers at low dose plus  
2995 ARB as initial treatment for hypertensive patients could remarkably increase the  
2996 control rate of hypertension. Moreover, ACEI or ARB could partially block the

2997 adverse reactions of reflexive increased Sympathetic nervous tension and rapid heart  
2998 rate resulting from BBC.

2999 (3) CCB+Thiazide-type diuretics: FEVER study showed that Dihydropyridines CCB  
3000 + Thiazide-type diuretics treatment could reduce the occurrence of stroke in  
3001 hypertensive patients.

3002 (4) Dihydropyridines CCB (D-CCB) +  $\beta$  blockers: the effect of dilating vein and  
3003 increasing heart rate in the former can counteract the shrinking and lowering heart rate  
3004 effect of  $\beta$  blockers. Adverse reactions can be reduced by the combination therapy.

3005 Mainly recommended optimized combination regimens include: D-CCB+ARB,  
3006 D-CCB+ACEI, ARB+Thiazide-type diuretics, ACEI+Thiazide-type diuretics, D-CCB  
3007 Thiazide-type diuretics, and D-CCB+  $\beta$  blockers.

3008 Secondly recommended optimized combination regimens: diuretics+ $\beta$  blockers,  
3009  $\alpha$ -blockers+ $\beta$ -blockers, D-CCB+potassium-sparing diuretics, and Thiazide-type  
3010 diuretics + potassium-sparing diuretics.

3011 Combination regimens that are non-conventionally recommended but used with  
3012 caution when necessary include ACEI+ $\beta$ -blockers, ARB+ $\beta$ -blockers, ACEI+ARB,  
3013 and centrally acting antihypertensive drugs + $\beta$ -blockers.

3014 Combination of more than 2 types of drugs: (1) Combination of 3 types of drugs: the  
3015 combination is formed by adding another type of anti-hypertensive drug based on one  
3016 of the above combination therapy consisted of 2 types, and the combination therapy of  
3017 Dihydropyridines CCB+ACEI (or ARB)+Thiazide-type diuretics is the most  
3018 frequently used. (2) Combination of 4 types of drugs: it is mainly applied for patients  
3019 with refractory hypertension. The combination can be formed by adding another type  
3020 of anti-hypertensive drug based on one of the above combination therapy consisted of  
3021 3 types, such as  $\beta$  blockers, Spironolactone, Clonidine or  $\alpha$  blockers.

3022 4) Fixed compound preparation: it is a group of commonly used anti-hypertensive  
3023 drugs. It is usually comprised of 2 types of low dose anti-hypertensive drugs with  
3024 different mechanisms, and it is also called single tablet fixed compound preparation.  
3025 Different from the separately prescribed anti-hypertensive combination therapy, it is  
3026 easy to use and improves patient compliance, and it is becoming the new trend for the  
3027 combination therapy. Fixed compound preparation can be used as one of the initial  
3028 drug treatment for some patients with grade 2 or 3 hypertension or patients at high  
3029 risk. Contraindications for the corresponding composition and potential adverse effect  
3030 should be noticed in use.

3031. Traditional fixed compound preparation includes: (1) Compound Reserpine Tablets

Hutchison Medi Pharma Ltd.

Confidential

Simplified Chinese Protocol Version 3.0, dated 24 Nov 2014

Translated from Simplified Chinese to English on 5Dec2014 by Kuntuo

English Protocol Version 3.0, dated 5Dec2014

3032 (Compound anti-hypertension tablet), (2) Compound Hypotensive Tablets Compound  
3033 Reserpine And Hydrochlorthiazide Tablets (Beijing Hypotensive No.0), (3) Zhenju  
3034 Jiangya Tablet, main ingredients include Reserpine Tablets, Hydrochlorothiazide, and  
3035 Dihydralazine Hydrochloride or Clonidine. Despite the disputation about rationality  
3036 of the composition of the compound preparation, it is widely used in the grass roots.

3037. New type of fixed compound preparation includes: It is usually comprised of 2 types  
3038 of anti-hypertensive drugs with different mechanism. Most of this kind of drug is  
3039 orally taken, 1 tablet/d. It is easy to use and improves patient compliance. Principal  
3040 types of fixed compound preparation on Chinese market include: ACEI+  
3041 Thiazide-type diuretics, ARB+ Thiazide-type diuretics, Dihydropyridines CCB+ARB,  
3042 Dihydropyridines CCB+ $\beta$  blockers; Thiazide-type diuretics+potassium-sparing  
3043 diuretics.

3044. Fixed compound preparation comprised of anti-hypertensive drugs and other  
3045 cardiovascular drugs: Dihydropyridines CCB+Statin, and ACEI+folic acid. The  
3046 medication of this kind of drugs should be based on the coexisting risk factors or  
3047 medical conditions, and the indications and contraindications of anti-hypertensive  
3048 drugs and non- anti-hypertensive drugs should be considered.

## 3049 5.5. Management of Relative Risk Factors

### 3050 5.5.1. Lipid Regulation Treatment

3051 Dyslipidemia is an important risk factor of atherosclerosis. The risk of cardiovascular  
3052 disease will be significantly increased for hypertension with dyslipidemia.  
3053 Hypertension is the most dangerous pathogenic factor for Chinese population  
3054 compared with other cardiovascular diseases. *Guidelines on Prevention and Treatment*  
3055 *of Blood Lipid Abnormality in Chinese Adults* emphasizes the importance of  
3056 stratification of cardiovascular risks imposed on patients with dyslipidemia by  
3057 hypertension in Chinese population.

3058 The efficacy of combination therapy with Statins in the treatment of hypertension was  
3059 evaluated in ALLHAT and ASCOT trials. ASCOT study results showed that lipid  
3060 regulation treatment was helpful, which reduced the risk of stroke by 15% and 30% as  
3061 primary prevention and secondary prevention. The series of international trials about  
3062 Statins in coronary disease and the study of Xuezhikang conducted in China indicated  
3063 that secondary prevention could be of significant benefit for patients with coronary  
3064 disease and hypertension, since it could reduce the coronary events and overall  
3065 mortality remarkably. Similar effect could be achieved by lipid regulation treatment of  
3066 Statins for patients with or without hypertension in preventing cardiovascular events,



3067 i.e. it could effectively reduce the risks of cardiovascular events. Low dose of Statins  
3068 was safe and effective when used in patients with hypertension and dyslipidemia as  
3069 primary prevention. Drug treatment of Statins is not required for all the patients with  
3070 hypertension as primary prevention. Lipid regulation treatment of Statins could be of  
3071 significant benefit for patients with moderate and high risks of cardiovascular disease,  
3072 but not for patients with low risks. Based on the consideration of safety and  
3073 benefit/cost ratio, treatment of Statins for patients with low risks as primary  
3074 prevention should be used with caution.

3075 Patients with hypertension and dyslipidemia should adopt active anti-hypertensive  
3076 treatment and appropriate lipid regulation treatment. Recommendations for lipid  
3077 regulation treatment are as follows: firstly, change to curative lifestyle. Statins should  
3078 be the first choice of drug therapy when the lipid level can't reach the goal after strict  
3079 implementation of curative lifestyle for 3-4 months (Table 2). The dispute about the  
3080 relationship between blood TC level and cerebral hemorrhage is still ongoing and  
3081 needs further investigation. Adverse reactions such as abnormal liver function and  
3082 myalgia should be noted, and regular examination of hematology, ALT, AST and CK  
3083 should be performed during the treatment of Statins.

#### 3084 5.5.2 Anti-platelet Therapy

3085 Supported by numerous clinical study evidences, the effect of aspirin in secondary  
3086 prevention of cardio-cerebrovascular diseases is well recognized. Aspirin can  
3087 effectively reduce the risks of serious cardiovascular disease by 25%, among which,  
3088 non-fatal myocardial infarction is reduced by 1/3, non-fatal brain stroke is reduced by  
3089 1/4, and tall the vascular events are reduced by 1/6. (1) Aspirin of low dose (100 mg/d)  
3090 should be used in the secondary prevention for patients with hypertension  
3091 accompanied by co-existing stable coronary heart disease, myocardial infarction,  
3092 ischemic stroke or history of TIA and co-existing peripheral arthrosclerosis. (2)  
3093 Administration of aspirin should be based on recommendation of applicable  
3094 guidelines for patients with co-existing thrombosis accompanied with acute coronary  
3095 syndrome, ischemic stroke or TIA, and peripheral arteriosclerosis obliterans. Aspirin  
3096 of loading dose (300 mg/d) could be administered in acute period for secondary  
3097 prevention and then low dose (100 mg/d) should be used. (3) Anticoagulants such as  
3098 Warfarin are preferred for hypertensive patients with atrial fibrillation. For patients at  
3099 moderate or low risks and that cannot administer oral anticoagulants, aspirin can be  
3100 given according to the applicable guidelines. (4) Aspirin of low dose (75mg~  
3101 100mg/d) can be used in the primary prevention for patients with hypertension

3102 accompanied by co-existing diabetes or patients at high risk of cardiovascular events.  
3103 (5) Clopidogrel (75 mg/d) can be used for patients who cannot tolerate aspirin.  
3104 The followings should be paid attention to long-term use of aspirin for patients with  
3105 hypertension: (1) aspirin should be initiated when BP is stable (<150/90 mmHg), and  
3106 it might increase the risk of cerebral hemorrhage for patients with poor-controlled BP.  
3107 (2) high risk factors such as disease of digestive tract (peptic ulcers and its  
3108 complications), age >65 yrs, concomitant medication of corticosteroids or other  
3109 anticoagulants or nonsteroidal anti-inflammatory drugs should be screened before  
3110 administration. Prevention actions (screening and treatment of Helicobacter pylori  
3111 infection, preventive use of proton pump inhibitor and application of proper  
3112 combination therapy of antithrombotic drugs) should be taken if high risk factors exist.  
3113 (3) Patients with co-existing active gastric ulcer, severe hepatopathy, and hemorrhagic  
3114 disease should use aspirin with caution or discontinue aspirin treatment.

#### 3115 5.5.3. Blood Glucose Control

3116 The risk of cardiovascular disease is higher in hypertensive patients with diabetes.  
3117 The increasing risk of cardiovascular disease is associated with FBG or glycosylated  
3118 hemoglobin (HbA1c) above normal level. UKPDS study indicates enhancement of  
3119 blood glucose control has little prevention effect in major vascular events, but has  
3120 significant lowering effect in microvascular complications compared to conventional  
3121 blood glucose control. The ideal target of diabetes treatment is: FBG  $\leq 6.1$  mmol/L or  
3122 HbA1c  $\leq 6.5\%$ . For old people, especially for those live alone, with long course of  
3123 disease, many complications, diabetic patients with poor self-control, blood glucose  
3124 control shouldn't be too strict, the target level is FBG  $\leq 7.0$  mmol/L or HbA1c  $\leq 7.0\%$ ,  
3125 PBG  $\leq 10.0$  mmol/L. For diabetic patients at middle or young age, blood glucose  
3126 should be controlled within normal limit, i.e. FBG  $\leq 6.1$  mmol/L, 2hPBG  
3127  $\leq 8.10$  mmol/L, HbA1c  $\leq 6.5\%$ .

#### 3128 5.5.4. Comprehensive Intervention of Various Dangerous Factors

3129 Hypertensive patients often have many coexisting cardiovascular risk compositions,  
3130 including risk factors, coexisting target organ damage and concurrent medical  
3131 conditions. In addition to intervention in certain risk composition, comprehensive  
3132 intervention of various dangerous factors should be emphasized. Comprehensive  
3133 intervention is good for overall control of cardiovascular risk factors and prevention  
3134 of cardiovascular disease in the early period. There are many aspects involved in the  
3135 comprehensive intervention of hypertensive patients, e.g. anti-hypertension, lipid  
3136 regulation, antithrombus treatment. Data suggests hyperhomocysteinemia is

3137 associated with risk of brain stroke, while the risk can be lowered by adding folic acid.  
3138 Thus, supplement of folic acid in population who has deficiency of folic acid can be  
3139 one of the comprehensive intervention measures. The goal of prevention of  
3140 cardiovascular disease can be achieved by managing various risk factors, protecting  
3141 target organs and treating the diagnosed diabetic patients.

3142 Inexpensive, low dose fixed compound preparation (Polypill) is beneficial in  
3143 improving the compliance and effect of comprehensive intervention. At present, the  
3144 Polypill that is available on the market includes anti-hypertensive drugs/lipid  
3145 regulating agents (Amlodipine/Atorvastatin) fixed compound preparation;  
3146 anti-hypertensive drugs/folic acid (Enalapril/folic acid) fixed compound preparation.  
3147 The ongoing international Polypill intervention study (TIPS) will evaluate pilypill  
3148 (ACEI, Hydrochlorothiazide of low dose, Atenolol, Simvastatin) as primary  
3149 prevention in population at moderate or severe risk and susceptible to cardiovascular  
3150 disease.

#### 3151 5.6. Periodic Checkups and Recording in Hypertension Treatment

3152 5.6.1. Objectives and Details: in the period after the treatment initiation, in order to  
3153 assess the treatment response and maintain the BP at target level, periodic checkups  
3154 should be enhanced, and intervals between periodic checkups should be shorter.

3155 The relationship with patients should be well established in the periodic checkups,  
3156 except close monitoring of patients' BP, other risk factors and improvement of  
3157 medical conditions and observing the efficacy. The patients should be given lectures  
3158 about healthcare, they should know the condition of their diseases, including  
3159 hypertension, risk factors and co-existing clinical conditions, they should know the  
3160 importance of controlling BP, and the necessity of lifelong treatment. On time  
3161 administration should be stressed at periodic checkups to get a satisfying efficacy, and  
3162 patients should get acquainted with potential adverse effect of the drug therapy, and  
3163 once they experience the adverse effect, they should report as soon as possible. The  
3164 importance of changing lifestyle should be explained to patients in a simple way to let  
3165 them know the objective of treatment and stick to the plan for a long term.

3166 Intervals between periodic checkups: intervals should be determined according to the  
3167 patients' stratification of overall cardiovascular risk and BP level in discretion of  
3168 doctors. If the current BP level of hypertensive patient is high-normal BP or grade1,  
3169 and the risk stratification of the patient is in low grade or the patient is taking only one  
3170 drug, the periodic checkup can be arranged once every 1-3months. For those  
3171 newly-diagnosed case with high risk and complex diseases, the intervals should be

3172 shorter, for those with high risk and BP not attained to standard level, periodic  
3173 checkup should be at least once every two weeks; for those with stable BP attained to  
3174 standard level, follow-up should be once a month. If the BP is reduced to the target  
3175 level and other risk factors are controlled after treatment, follow-up can be reduced.  
3176 Transferring patients to the specialized clinics of hypertension or specialized clinics of  
3177 hospital at higher level should be considered if the patient's BP level is still not  
3178 reaching the target level after 6 months' treatment and use of at least 3 types of drugs.  
3179 Specialized clinics of hypertension should be set up in qualified hospitals at different  
3180 levels, intensified follow-up should be done to improve the treatment rate and control  
3181 rate of hypertension.

3182 Special emphasis is: for patient who decided not to receive treatment temporarily,  
3183 regular follow-up and monitoring should be performed, and in case of delay the  
3184 decision about whether or not to give the patient anti-hypertensive drugs should be  
3185 made based on the follow-up results.

3186 Dose reduction: lifelong treatment is always needed for hypertensive patients. If the  
3187 patient discontinues the drug on his/her own will after the diagnosis, his/her BP level  
3188 will return to the pretreatment level (sooner or later). However, if the BP level of the  
3189 patient is under control for a long time, administration frequency or dose could be  
3190 carefully and gradually reduced, especially for those patients who receive the  
3191 treatment seriously, observe the lifestyle changing progress and results closely. The  
3192 BP level should be cautiously monitored when the patient is trying this gradual  
3193 reduction.

3194 Medical record: It usually takes a hypertensive decade to receive the treatment, and  
3195 there are many changes in the regimen, including choice of drugs. It is better for  
3196 doctors to recommend patients to keep a detailed recording of drugs he/she received  
3197 and the efficacy. Doctors should maintain the complete record for the patients he/she  
3198 treated for availability at any time.

3199 BP level at clinics of hypertension: the BP value measured by the doctor at clinics.

3200 BP level at admission: the BP value measured by the doctor at admission.

3201 Diagnosis of hypertension (example):

3202 For newly found elevated BP, if the BP is between 140-179/90-109mmHg, then  
3203 patient needs a reexamination (usually arranged after 2 weeks), if the 3 BP levels  
3204 which are not measured within 1 day meet the hypertension criteria, then a  
3205 hypertension should be diagnosed.

3206 For patient who was diagnosed as primary hypertension and is receiving

3207 anti-hypertensive treatment, if the BP level for this time is <140/90mmHg, then a  
3208 primary hypertension should be diagnosed (with treatment of anti-hypertensive  
3209 drugs).

3210 If the mean BP value is 152/96mmHg, then a grade 1 primary hypertension should be  
3211 diagnosed.

3212 If the hypertensive patient has coexisting risk factors or target organ damage, then the  
3213 risk factors or target organ damage can be listed, such as hypertension,  
3214 hypercholesterolemia, left ventricular hypertrophy.

3215 If the hypertensive patient has coexisting clinical conditions, then clinical conditions  
3216 could be listed, such as hypertension, coronary heart disease, angina pectoris, sequel  
3217 of cerebral infarction and diabetes.

3218 Writing about the hypertension risk stratification in the clinic medical record or  
3219 in-patient case history: risk stratification provides reference mainly for prognosis and  
3220 medical decision-making. Risk stratification (such as high risk) is not recommended  
3221 to be included in the hypertension diagnosis of clinic medical record. There is no  
3222 explicit provision about whether to include the risk stratification in the hypertension  
3223 diagnosis of in-patient case history. However, exclusion of risk stratification in the  
3224 hypertension diagnosis of in-patient case history is preferred. And the severity can be  
3225 narrated in the case analysis.

#### 3226 5.6.2. Dose Adjustment

3227 For most patients with non-acute hypertension or acute hypertension, the  
3228 anti-hypertensive treatment should be performed gradually to find the minimum  
3229 effective dose. Thus, treatment should be initiated with low dose, dose can be  
3230 increased if there is insufficient efficacy and few adverse reactions or the reactions are  
3231 tolerable after 2-4 weeks of treatment. If the adverse reactions are intolerable, then  
3232 treatment can be switched to another drug. BP measurement should be performed at  
3233 the same time during follow-up period. For patient with severe hypertension, early  
3234 control of BP should be done to increase dose and combined medication. During the  
3235 follow-up period, necessary examinations are required as well as subjects' subjective  
3236 feeling to understand the target organ condition and adverse reactions. For patients  
3237 with non-acute hypertension or acute hypertension, if the BP is controlled and  
3238 maintained stable for over 1 year after treatment, under the premise of not affecting  
3239 efficacy, dose reduction can be attempted to reduce the potential adverse reactions.

#### 3240 5.6.3. Annual Assessment of Risk Stratification and Adjustment of Stratification and 3241 Management Level

3242 For patients who are clearly diagnosed as hypertension in early period, risk  
3243 stratification should be based on BP level, co-existing risk factors, target organ  
3244 damage, clinical conditions. For patients who were diagnosed as hypertension  
3245 previously but the previous conditions could not be determined at present, risk  
3246 stratification should be based on current conditions. Try to use the mean value of  
3247 several BP values measured not in 1 day to be the BP value for risk stratification and  
3248 BP classification, or use the mean value of the BP measured in the latter 6 days of 7  
3249 continuous days (e.g. home blood pressure). The hypertensive patients should be  
3250 evaluated annually. An annual evaluation of patients who are under risk stratification  
3251 and classification should be conducted by the physician in charge. New management  
3252 level is determined in compliance with follow-up recording (BP recording for the  
3253 whole year, change of risk factors). Clinical assessment, reconfirmation of  
3254 management level, follow-up management according to the new level management  
3255 should be conducted when the hypertensive patients under management experience  
3256 condition change and diseases related to hypertension. In general, for patients with  
3257 co-existing heart, brain and kidney diseases and diabetes and pertaining to the high  
3258 risk or very high risk population, risk stratification and management level remain  
3259 unchanged for long term; for patients with co-existing target organ damage and  
3260 pertaining to the high risk population, the level remains unchanged; for patients who  
3261 are classified as moderate risk level or high risk level only based on BP level and/or  
3262 1-2 changeable risk factors, the management level can be adjusted after 1 year's  
3263 management according to the practical condition; for patients with well-controlled BP  
3264 for long time (6 continuous months), risk stratification and management level can be  
3265 lowered with caution; for patients with newly occurred cardio-cerebrovascular disease  
3266 or nephropathy and diabetes, assessment should be changed: e.g. previous assessed as  
3267 low risk or moderate risk should be changed to high risk or very high risk, and the  
3268 management level should be increased meanwhile.
