# Supplementary material
Source: PubMed Central journal article supplement (PMC6583690)
Supplement: jama-319-2486-s004.pdf [file jama-319-2486-s004.pdf]

1 **Tests for the proportional hazards assumption:**

2

3 **Methodology:** The method was added to the Statistical Methods (line 209):  
4 Post-hoc tests for interaction of treatment by each covariate were performed by fitting Cox models  
5 including treatment, covariate, and covariate by treatment interaction term. The significance level for  
6 interaction test was set to two-sided 0.10.

7 The assumption of proportionality was assessed firstly by examining plots of complementary log-log  
8 (event times) versus log (time) and, if this raised concerns, by adding interaction of treatment with time to  
9 the stratified Cox model to assess the extent to which this represented random variation. If a lack of  
10 proportionality was evident, the variation in treatment effect would be described by presenting piecewise  
11 hazard ratio calculated over distinct time-periods from a post-hoc analysis. In such circumstances, the  
12 hazard ratio can still be meaningfully interpreted as an average hazard ratio over time.<sup>1,2</sup>

13

14 The proportionality check for PFS: As shown in the plot of complementary log-log (event times) versus log  
15 (time), a concern was raised on the proportional hazards assumption. Therefore, the assumption was  
16 further tested by adding treatment by time interaction term to the stratified Cox model. The result  
17 showed that the p-value for the interaction is 0.0029. Therefore the piecewise HRs were explored for two  
18 periods: 0 to 1.85 months post-randomization, and 1.85 months post-randomization to thereafter). The  
19 cutoff 1.85 months post-randomization was the time point where the two PFS curves were getting to the  
20 closest.

21

22 **Figure1** Plot of Negative Log of Estimate Progression Free Survival Probability

23

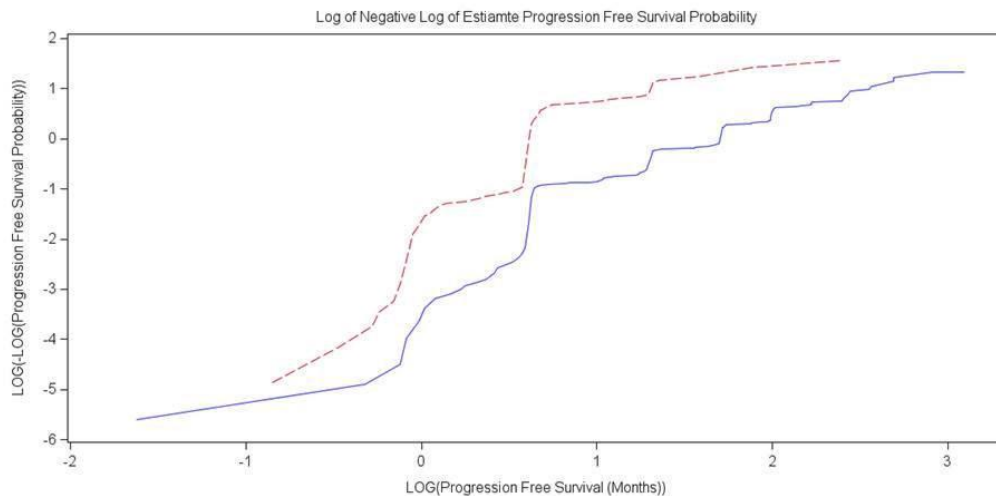

24

25

<sup>1</sup> Borucka, Jadwiga. Extensions of Cox Model For Non-Proportional Hazards Purpose. *Ekonometria* 2014;3(45): 85-101.

<sup>2</sup> Allison, Paul D. 2010. *Survival Analysis Using SAS®: A Practical Guide*, Second Edition. Cary, NC: SAS Institute Inc

26  
27

**Table 1.** Testing of Treatment-by-Time Interaction Using Stratified Cox Model

| Parameter                           | Degree of Freedom | Parameter Estimate | Standard Error | Chi-Square | p-value |
|-------------------------------------|-------------------|--------------------|----------------|------------|---------|
| Treatment                           | 1                 | -1.98435           | 0.24602        | 65.0601    | <.0001  |
| Treatment*Progression Free Survival | 1                 | -0.27557           | 0.09266        | 8.8444     | 0.0029  |

28  
29  
30  
31  
32  
33

Note: The stratified cox model included treatment and interaction of treatment by progression free survival time (continuous variable). Stratified factors included use of VEGF inhibitor (yes vs. no) and KRAS gene state (wild type vs. mutated).

34  
35

**Table 2.** Piecewise Hazard Ratios (Fruquintinib vs Placebo) from Stratified Cox Model

| Time from Randomization (Months) | Hazard Ratio | 95% Confidence Interval |
|----------------------------------|--------------|-------------------------|
| (0, 1.85]                        | 0.20         | (0.14,0.29)             |
| (1.85,∞)                         | 0.12         | (0.05, 0.26)            |

36  
37  
38  
39  
40

Note: The stratified cox model included treatment and interaction of treatment by progression free survival time ( $\leq 18.5$  months or  $>18.5$  months). Stratified factors included use of VEGF inhibitor (yes vs. no) and KRAS gene state (wild type vs. mutated).
